# Supplementary material
Source: publisher figshare collection journal article supplement (https://acs.figshare.com/ndownloader/files/3976981)
Supplement: Supplementary file 1 [file 3976981]

data_global

_publ_contact_letter
;

These are the CIF format data (8 structures) for the paper 

"Synthesis and reactions of a cyclopentadienyl-amidinate 
titanium tert-butoxyimido compound"

Laura R. Groom, Andrew D. Schwarz, Ainara Nova, 
Eric Clot, and Philip Mountford


;
_publ_contact_author
;
 Prof P. Mountford           
 Chemistry Research Laboratory
 Mansfield Road
 Oxford
 OX1 3TA
 UK
;      
_publ_contact_author_phone      '+44 1865 285140'
_publ_contact_author_email      Philip.Mountford@chem.ox.ac.uk


data_compound_19

# local code LG2

_chemical_name_systematic         
;
C5Me5Ti(PhDIPA)(NOtBu)
;
_chemical_melting_point           ?

_refine_special_details 
; 
Hydrogen atoms were placed geometrically with reference to a Fourier
difference map and refined in a riding model. 

Flack parameter of 0.52 is due to the crystal being an intimate twin of both 
enantiomers and partial compatibility with P b c a. 

A possible transformation to P b c a was suggested by examination of the 
intensities of the reflections affected by the respective glide planes. Further 
investigation found that while the Ti and N atom positions were commensurate
with transformation from P 21 21 21 to P b c a, the Cp*, iso-propyl and OtBu
atoms were not. Transformation and attempted refinement in P b c a led to a
very disordered and unstable model. Therefore the lower symmetry space group
was selected as the most suitable in this case.
; 
_cell_length_a                    16.6135(2)
_cell_length_b                    17.1813(2)
_cell_length_c                    19.3943(2)
_cell_angle_alpha                 90
_cell_angle_beta                  90
_cell_angle_gamma                 90
_cell_volume                      5535.94(11)
 
_symmetry_cell_setting            'Orthorhombic' 
_symmetry_space_group_name_H-M    'P 21 21 21 ' 
_symmetry_space_group_name_Hall   'P 2ac 2ab' 
loop_
 _symmetry_equiv_pos_as_xyz
 'x,y,z'
 'x+1/2,-y+1/2,-z'
 '-x,y+1/2,-z+1/2'
 '-x+1/2,-y,z+1/2'

loop_
_atom_type_symbol
_atom_type_scat_dispersion_real
_atom_type_scat_dispersion_imag
_atom_type_scat_Cromer_Mann_a1
_atom_type_scat_Cromer_Mann_b1
_atom_type_scat_Cromer_Mann_a2
_atom_type_scat_Cromer_Mann_b2
_atom_type_scat_Cromer_Mann_a3
_atom_type_scat_Cromer_Mann_b3
_atom_type_scat_Cromer_Mann_a4
_atom_type_scat_Cromer_Mann_b4
_atom_type_scat_Cromer_Mann_c
_atom_type_scat_source  
 C       0.0033   0.0016   2.3100  20.8439   1.0200  10.2075   1.5886   0.5687
   0.8650  51.6512   0.2156 'International Tables Vol C 4.2.6.8 and 6.1.1.4'
 H       0.0000   0.0000   0.4930  10.5109   0.3229  26.1257   0.1402   3.1424
   0.0408  57.7998   0.0030 'International Tables Vol C 4.2.6.8 and 6.1.1.4'
 N       0.0061   0.0033  12.2126   0.0057   3.1322   9.8933   2.0125  28.9975
   1.1663   0.5826 -11.5290 'International Tables Vol C 4.2.6.8 and 6.1.1.4'
 O       0.0106   0.0060   3.0485  13.2771   2.2868   5.7011   1.5463   0.3239
   0.8670  32.9089   0.2508 'International Tables Vol C 4.2.6.8 and 6.1.1.4'
 Ti      0.2776   0.4457   9.7595   7.8508   7.3558   0.5000   1.6991  35.6338
   1.9021 116.1050   1.2807 'International Tables Vol C 4.2.6.8 and 6.1.1.4'
 
 
_cell_formula_units_Z                    8


_chemical_formula_sum             'C27 H43 N3 O1 Ti1'
_chemical_formula_moiety          'C27 H43 N3 O1 Ti1'
_chemical_compound_source                ?
_chemical_formula_weight            473.51
 
 
_cell_measurement_reflns_used         6909
_cell_measurement_theta_min              5
_cell_measurement_theta_max             27
_cell_measurement_temperature          150
 
_exptl_crystal_description        'block' 
_exptl_crystal_colour             'green' 
_exptl_crystal_size_min           0.300 
_exptl_crystal_size_mid           0.300 
_exptl_crystal_size_max           0.300 
 
_exptl_crystal_density_diffrn     1.136 
_exptl_crystal_density_meas       ? 
_exptl_crystal_density_method     'not measured' 
_exptl_crystal_F_000              2048 
_exptl_absorpt_coefficient_mu     0.331 
 
_exptl_absorpt_correction_type    multi-scan 
_exptl_absorpt_process_details    'DENZO/SCALEPACK (Otwinowski & Minor, 1997)' 
_exptl_absorpt_correction_T_min   0.91 
_exptl_absorpt_correction_T_max   0.91 
_diffrn_measurement_device_type   'Nonius KappaCCD' 
_diffrn_measurement_device        'Area' 
_diffrn_radiation_monochromator   'graphite' 
_diffrn_radiation_type            'Mo K\a'
_diffrn_radiation_wavelength           0.71073
_diffrn_measurement_method        \w 
 
_computing_data_collection        'COLLECT (Nonius, 2001).' 
_computing_cell_refinement        'DENZO/SCALEPACK (Otwinowski & Minor, 1997)' 
_computing_data_reduction         'DENZO/SCALEPACK (Otwinowski & Minor, 1997)' 
_computing_structure_solution     'SIR92 (Altomare et al., 1994)' 
_computing_structure_refinement   'CRYSTALS (Betteridge et al., 2003)' 
_computing_publication_material   'CRYSTALS (Betteridge et al., 2003)' 
_computing_molecular_graphics     'CAMERON (Watkin et al., 1996)' 
 
_diffrn_standards_interval_time   . 
_diffrn_standards_interval_count  . 
_diffrn_standards_number          0 
_diffrn_standards_decay_%         ? 
 
_diffrn_ambient_temperature        150
_diffrn_reflns_number             65185
_reflns_number_total              12594 
_diffrn_reflns_av_R_equivalents   0.0389
 
 
_diffrn_reflns_theta_min          5.121 
_diffrn_reflns_theta_max          27.478 
_diffrn_measured_fraction_theta_max 0.990 
 
_diffrn_reflns_theta_full         26.929 
_diffrn_measured_fraction_theta_full 0.990 
 
 
_diffrn_reflns_limit_h_min        -21 
_diffrn_reflns_limit_h_max        21 
_diffrn_reflns_limit_k_min        -22 
_diffrn_reflns_limit_k_max        22 
_diffrn_reflns_limit_l_min        -25 
_diffrn_reflns_limit_l_max        25 
_reflns_limit_h_min               -21 
_reflns_limit_h_max               21 
_reflns_limit_k_min               0 
_reflns_limit_k_max               22 
_reflns_limit_l_min               0 
_reflns_limit_l_max               25 
 
_oxford_diffrn_Wilson_B_factor    2.50 
_oxford_diffrn_Wilson_scale       40.04 
 
_atom_sites_solution_primary      Direct 
_atom_sites_solution_secondary  difmap
_atom_sites_solution_hydrogens    geom
 
_refine_diff_density_min          -0.28 
_refine_diff_density_max          0.24 
 
 
# The current dictionary definitions do not cover the 
# situation where the reflections used for refinement were 
# selected by a user-defined sigma threshold 
 
 
# The values actually used during refinement 
_oxford_reflns_threshold_expression_ref     I>3.0\s(I)
_refine_ls_number_reflns          7629 
_refine_ls_number_restraints      0 
_refine_ls_number_parameters      578 
_oxford_refine_ls_R_factor_ref    0.0459 
_refine_ls_wR_factor_ref          0.0520 
_refine_ls_goodness_of_fit_ref    1.0998 
_refine_ls_shift/su_max           0.0005598 
_refine_ls_shift/su_mean          0.0000220 
 
 
# The values computed from all data 
_oxford_reflns_number_all         12594 
_refine_ls_R_factor_all           0.0897 
_refine_ls_wR_factor_all          0.1035 
 
# The values computed with a 2 sigma cutoff - a la SHELX 
_reflns_threshold_expression      I>2.0\s(I)
_reflns_number_gt                 8647 
_refine_ls_R_factor_gt            0.0531 
_refine_ls_wR_factor_gt           0.0571 
 
_refine_ls_abs_structure_Flack    0.52(3) 
_refine_ls_abs_structure_details  'Flack (1983), 5711 Friedel-pairs' 
_chemical_absolute_configuration  'ad' 
 
 
_refine_ls_structure_factor_coef  F 
_refine_ls_matrix_type            full
_refine_ls_hydrogen_treatment     none
_refine_ls_weighting_scheme       calc 
_refine_ls_weighting_details 
;
 Method, part 1, Chebychev polynomial, (Watkin, 1994, Prince, 1982) 
 [weight] = 1.0/[A~0~*T~0~(x)+A~1~*T~1~(x) ... +A~n-1~]*T~n-1~(x)] 
 where A~i~ are the Chebychev coefficients listed below and x= Fcalc/Fmax 
 Method = Robust Weighting (Prince, 1982) 
 W = [weight] * [1-(deltaF/6*sigmaF)^2^]^2^ 
 A~i~ are: 
 0.381 0.228 0.172 
;
_publ_section_references 
; 
Nonius (2001). COLLECT. Nonius BV, Delft, The Netherlands. 
 
Otwinowski, Z. & Minor, W. (1997). Methods in Enzymology, Vol. 276, 
edited by C. W. Carter Jr & R. M. Sweet, pp. 307--326. 
New York: Academic Press. 
 
Betteridge, P.W., Carruthers, J.R., Cooper, R.I., 
Prout, K. & Watkin, D.J. (2003). J. Appl. Cryst. 36, 1487. 
 
Watkin, D.J., Prout, C.K. & Pearce, L.J. (1996). CAMERON, Chemical 
Crystallography Laboratory, Oxford, UK. 
 
Altomare, A., Cascarano, G., Giacovazzo, C., Guagliardi, A., Burla, M.C., 
Polidori, G. & Camalli, M. (1994). J. Appl. Cryst. 27, 435. 
 
Watkin D.J. (1994). 
Acta Cryst, A50, 411-437. 
 
Prince, E. 
Mathematical Techniques in Crystallography 
and Materials Science 
Springer-Verlag, New York, 1982. 
 
Flack, H. D. (1983). Acta Cryst. A39, 876-881. 
; 

# Uequiv = arithmetic mean of Ui i.e. Ueqiv = (U1+U2+U3)/3


loop_
_atom_site_label
_atom_site_type_symbol
_atom_site_fract_x
_atom_site_fract_y
_atom_site_fract_z
_atom_site_U_iso_or_equiv
_atom_site_occupancy
_atom_site_adp_type
_atom_site_refinement_flags_posn
_atom_site_refinement_flags_adp
_atom_site_refinement_flags_occupancy
_atom_site_disorder_assembly
_atom_site_disorder_group
_atom_site_attached_hydrogens
Ti1 Ti 0.65901(3) 0.06622(4) 0.86334(3) 0.0252 1.0000 Uani . . . . . . 
N1 N 0.74722(17) 0.09546(19) 0.90051(17) 0.0324 1.0000 Uani . . . . . . 
N2 N 0.67714(19) 0.04889(18) 0.75655(15) 0.0297 1.0000 Uani . . . . . . 
N3 N 0.62858(18) 0.16123(17) 0.79855(16) 0.0280 1.0000 Uani . . . . . . 
O1 O 0.80621(15) 0.11584(17) 0.94733(14) 0.0365 1.0000 Uani . . . . . . 
C1 C 0.8869(2) 0.0929(3) 0.9255(2) 0.0388 1.0000 Uani . . . . . . 
C2 C 0.9397(3) 0.1300(3) 0.9801(2) 0.0539 1.0000 Uani . . . . . . 
C3 C 0.9044(2) 0.1246(3) 0.8543(2) 0.0496 1.0000 Uani . . . . . . 
C4 C 0.8923(3) 0.0057(3) 0.9278(3) 0.0639 1.0000 Uani . . . . . . 
C5 C 0.6652(2) 0.1248(2) 0.74669(18) 0.0283 1.0000 Uani . . . . . . 
C6 C 0.6960(2) 0.1668(2) 0.6836(2) 0.0277 1.0000 Uani . . . . . . 
C7 C 0.7718(3) 0.2017(3) 0.6853(2) 0.0399 1.0000 Uani . . . . . . 
C8 C 0.8005(2) 0.2412(2) 0.6282(3) 0.0437 1.0000 Uani . . . . . . 
C9 C 0.7537(3) 0.2464(3) 0.5697(2) 0.0464 1.0000 Uani . . . . . . 
C10 C 0.6801(3) 0.2122(3) 0.5673(2) 0.0513 1.0000 Uani . . . . . . 
C11 C 0.6511(3) 0.1725(3) 0.6245(2) 0.0403 1.0000 Uani . . . . . . 
C12 C 0.7197(2) 0.0008(2) 0.7048(2) 0.0310 1.0000 Uani . . . . . . 
C13 C 0.7657(3) -0.0630(3) 0.7419(2) 0.0460 1.0000 Uani . . . . . . 
C14 C 0.6610(3) -0.0342(3) 0.6533(2) 0.0438 1.0000 Uani . . . . . . 
C15 C 0.6225(3) 0.2463(2) 0.8014(2) 0.0353 1.0000 Uani . . . . . . 
C16 C 0.6733(3) 0.2766(2) 0.8598(2) 0.0493 1.0000 Uani . . . . . . 
C17 C 0.5349(3) 0.2704(2) 0.8112(3) 0.0539 1.0000 Uani . . . . . . 
C18 C 0.6122(2) 0.0163(3) 0.96900(19) 0.0373 1.0000 Uani . . . . . . 
C19 C 0.6168(2) -0.0466(2) 0.9220(2) 0.0346 1.0000 Uani . . . . . . 
C20 C 0.5583(2) -0.0345(2) 0.87016(19) 0.0328 1.0000 Uani . . . . . . 
C21 C 0.51943(19) 0.0367(2) 0.88354(19) 0.0310 1.0000 Uani . . . . . . 
C22 C 0.5527(2) 0.0676(2) 0.94505(18) 0.0318 1.0000 Uani . . . . . . 
C23 C 0.6612(3) 0.0252(3) 1.03411(19) 0.0565 1.0000 Uani . . . . . . 
C24 C 0.6701(3) -0.1171(3) 0.9283(3) 0.0648 1.0000 Uani . . . . . . 
C25 C 0.5366(3) -0.0894(3) 0.8128(2) 0.0519 1.0000 Uani . . . . . . 
C26 C 0.4524(2) 0.0714(3) 0.8418(2) 0.0490 1.0000 Uani . . . . . . 
C27 C 0.5261(3) 0.1406(2) 0.9820(2) 0.0502 1.0000 Uani . . . . . . 
Ti101 Ti 0.66713(3) 0.43469(4) 0.36002(3) 0.0260 1.0000 Uani . . . . . . 
N101 N 0.75557(17) 0.4075(2) 0.39890(17) 0.0331 1.0000 Uani . . . . . . 
N102 N 0.68436(18) 0.45027(18) 0.25203(15) 0.0298 1.0000 Uani . . . . . . 
N103 N 0.63739(18) 0.33825(18) 0.29688(16) 0.0287 1.0000 Uani . . . . . . 
O101 O 0.81187(15) 0.3890(2) 0.44834(15) 0.0452 1.0000 Uani . . . . . . 
C101 C 0.8940(2) 0.3985(3) 0.4236(2) 0.0420 1.0000 Uani . . . . . . 
C102 C 0.9441(3) 0.3658(4) 0.4821(3) 0.0648 1.0000 Uani . . . . . . 
C103 C 0.9047(3) 0.3537(4) 0.3582(3) 0.0751 1.0000 Uani . . . . . . 
C104 C 0.9099(4) 0.4840(4) 0.4140(4) 0.0887 1.0000 Uani . . . . . . 
C105 C 0.6713(2) 0.3739(2) 0.24308(18) 0.0259 1.0000 Uani . . . . . . 
C106 C 0.6978(2) 0.3308(2) 0.1804(2) 0.0301 1.0000 Uani . . . . . . 
C107 C 0.7731(2) 0.2958(2) 0.1776(2) 0.0357 1.0000 Uani . . . . . . 
C108 C 0.7957(3) 0.2542(2) 0.1197(2) 0.0456 1.0000 Uani . . . . . . 
C109 C 0.7454(3) 0.2487(3) 0.0628(3) 0.0490 1.0000 Uani . . . . . . 
C110 C 0.6711(3) 0.2847(3) 0.0656(2) 0.0505 1.0000 Uani . . . . . . 
C111 C 0.6472(3) 0.3252(3) 0.1239(2) 0.0423 1.0000 Uani . . . . . . 
C112 C 0.7230(2) 0.4970(3) 0.1987(2) 0.0356 1.0000 Uani . . . . . . 
C113 C 0.7780(3) 0.5569(3) 0.2312(2) 0.0448 1.0000 Uani . . . . . . 
C114 C 0.6595(3) 0.5363(3) 0.1532(2) 0.0495 1.0000 Uani . . . . . . 
C115 C 0.6325(3) 0.2529(2) 0.3009(2) 0.0339 1.0000 Uani . . . . . . 
C116 C 0.6469(3) 0.2272(3) 0.3739(2) 0.0499 1.0000 Uani . . . . . . 
C117 C 0.5527(3) 0.2243(3) 0.2742(3) 0.0630 1.0000 Uani . . . . . . 
C118 C 0.5984(2) 0.4568(2) 0.4639(2) 0.0369 1.0000 Uani . . . . . . 
C119 C 0.6327(2) 0.5276(2) 0.4431(2) 0.0350 1.0000 Uani . . . . . . 
C120 C 0.5941(2) 0.5509(2) 0.38210(19) 0.0314 1.0000 Uani . . . . . . 
C121 C 0.53644(19) 0.4947(2) 0.36442(19) 0.0333 1.0000 Uani . . . . . . 
C122 C 0.5387(2) 0.4366(2) 0.4156(2) 0.0373 1.0000 Uani . . . . . . 
C123 C 0.6208(3) 0.4124(3) 0.5286(2) 0.0621 1.0000 Uani . . . . . . 
C124 C 0.6958(2) 0.5725(3) 0.4825(2) 0.0579 1.0000 Uani . . . . . . 
C125 C 0.6057(3) 0.6275(2) 0.3450(3) 0.0551 1.0000 Uani . . . . . . 
C126 C 0.4817(2) 0.4956(3) 0.3026(2) 0.0561 1.0000 Uani . . . . . . 
C127 C 0.4831(3) 0.3673(2) 0.4198(3) 0.0621 1.0000 Uani . . . . . . 
H21 H 0.9946 0.1187 0.9707 0.0626 1.0000 Uiso R . . . . . 
H22 H 0.9257 0.1098 1.0240 0.0626 1.0000 Uiso R . . . . . 
H23 H 0.9318 0.1847 0.9797 0.0626 1.0000 Uiso R . . . . . 
H31 H 0.9572 0.1097 0.8408 0.0602 1.0000 Uiso R . . . . . 
H32 H 0.9005 0.1798 0.8547 0.0602 1.0000 Uiso R . . . . . 
H33 H 0.8664 0.1039 0.8227 0.0602 1.0000 Uiso R . . . . . 
H41 H 0.9443 -0.0113 0.9141 0.0804 1.0000 Uiso R . . . . . 
H42 H 0.8823 -0.0103 0.9739 0.0804 1.0000 Uiso R . . . . . 
H43 H 0.8530 -0.0164 0.8981 0.0804 1.0000 Uiso R . . . . . 
H71 H 0.8041 0.1979 0.7255 0.0526 1.0000 Uiso R . . . . . 
H81 H 0.8520 0.2651 0.6290 0.0540 1.0000 Uiso R . . . . . 
H91 H 0.7734 0.2741 0.5308 0.0609 1.0000 Uiso R . . . . . 
H101 H 0.6484 0.2153 0.5266 0.0611 1.0000 Uiso R . . . . . 
H111 H 0.5994 0.1489 0.6230 0.0500 1.0000 Uiso R . . . . . 
H121 H 0.7569 0.0328 0.6807 0.0364 1.0000 Uiso R . . . . . 
H131 H 0.7933 -0.0941 0.7090 0.0580 1.0000 Uiso R . . . . . 
H132 H 0.8035 -0.0404 0.7728 0.0580 1.0000 Uiso R . . . . . 
H133 H 0.7291 -0.0946 0.7671 0.0580 1.0000 Uiso R . . . . . 
H141 H 0.6895 -0.0646 0.6204 0.0542 1.0000 Uiso R . . . . . 
H142 H 0.6234 -0.0661 0.6770 0.0542 1.0000 Uiso R . . . . . 
H143 H 0.6333 0.0066 0.6303 0.0542 1.0000 Uiso R . . . . . 
H151 H 0.6421 0.2676 0.7594 0.0463 1.0000 Uiso R . . . . . 
H161 H 0.6703 0.3317 0.8623 0.0609 1.0000 Uiso R . . . . . 
H162 H 0.6538 0.2547 0.9016 0.0609 1.0000 Uiso R . . . . . 
H163 H 0.7277 0.2612 0.8531 0.0609 1.0000 Uiso R . . . . . 
H171 H 0.5303 0.3255 0.8125 0.0643 1.0000 Uiso R . . . . . 
H172 H 0.5156 0.2491 0.8533 0.0643 1.0000 Uiso R . . . . . 
H173 H 0.5040 0.2506 0.7739 0.0643 1.0000 Uiso R . . . . . 
H231 H 0.6469 0.0721 1.0570 0.0718 1.0000 Uiso R . . . . . 
H232 H 0.6515 -0.0177 1.0638 0.0718 1.0000 Uiso R . . . . . 
H233 H 0.7167 0.0267 1.0222 0.0718 1.0000 Uiso R . . . . . 
H241 H 0.6616 -0.1504 0.8898 0.0789 1.0000 Uiso R . . . . . 
H242 H 0.6576 -0.1444 0.9696 0.0789 1.0000 Uiso R . . . . . 
H243 H 0.7248 -0.1010 0.9293 0.0789 1.0000 Uiso R . . . . . 
H251 H 0.4953 -0.0671 0.7852 0.0677 1.0000 Uiso R . . . . . 
H252 H 0.5182 -0.1372 0.8316 0.0677 1.0000 Uiso R . . . . . 
H253 H 0.5828 -0.0985 0.7852 0.0677 1.0000 Uiso R . . . . . 
H261 H 0.4362 0.1197 0.8611 0.0623 1.0000 Uiso R . . . . . 
H262 H 0.4080 0.0365 0.8417 0.0623 1.0000 Uiso R . . . . . 
H263 H 0.4704 0.0793 0.7958 0.0623 1.0000 Uiso R . . . . . 
H271 H 0.4854 0.1657 0.9558 0.0641 1.0000 Uiso R . . . . . 
H272 H 0.5055 0.1273 1.0261 0.0641 1.0000 Uiso R . . . . . 
H273 H 0.5708 0.1746 0.9872 0.0641 1.0000 Uiso R . . . . . 
H1021 H 0.9998 0.3696 0.4714 0.0900 1.0000 Uiso R . . . . . 
H1022 H 0.9333 0.3939 0.5233 0.0900 1.0000 Uiso R . . . . . 
H1023 H 0.9301 0.3127 0.4885 0.0900 1.0000 Uiso R . . . . . 
H1031 H 0.9579 0.3593 0.3409 0.0934 1.0000 Uiso R . . . . . 
H1032 H 0.8948 0.3006 0.3688 0.0934 1.0000 Uiso R . . . . . 
H1033 H 0.8673 0.3708 0.3243 0.0934 1.0000 Uiso R . . . . . 
H1041 H 0.9633 0.4923 0.3980 0.1018 1.0000 Uiso R . . . . . 
H1042 H 0.9026 0.5100 0.4568 0.1018 1.0000 Uiso R . . . . . 
H1043 H 0.8727 0.5037 0.3812 0.1018 1.0000 Uiso R . . . . . 
H1071 H 0.8079 0.2997 0.2163 0.0412 1.0000 Uiso R . . . . . 
H1081 H 0.8469 0.2296 0.1189 0.0579 1.0000 Uiso R . . . . . 
H1091 H 0.7619 0.2209 0.0230 0.0580 1.0000 Uiso R . . . . . 
H1101 H 0.6360 0.2818 0.0270 0.0652 1.0000 Uiso R . . . . . 
H1111 H 0.5955 0.3487 0.1263 0.0560 1.0000 Uiso R . . . . . 
H1121 H 0.7548 0.4636 0.1707 0.0480 1.0000 Uiso R . . . . . 
H1131 H 0.8036 0.5869 0.1964 0.0595 1.0000 Uiso R . . . . . 
H1132 H 0.8176 0.5316 0.2585 0.0595 1.0000 Uiso R . . . . . 
H1133 H 0.7463 0.5899 0.2595 0.0595 1.0000 Uiso R . . . . . 
H1141 H 0.6854 0.5659 0.1182 0.0644 1.0000 Uiso R . . . . . 
H1142 H 0.6278 0.5698 0.1811 0.0644 1.0000 Uiso R . . . . . 
H1143 H 0.6260 0.4981 0.1325 0.0644 1.0000 Uiso R . . . . . 
H1151 H 0.6738 0.2315 0.2728 0.0416 1.0000 Uiso R . . . . . 
H1161 H 0.6442 0.1721 0.3772 0.0612 1.0000 Uiso R . . . . . 
H1162 H 0.6986 0.2444 0.3882 0.0612 1.0000 Uiso R . . . . . 
H1163 H 0.6070 0.2497 0.4028 0.0612 1.0000 Uiso R . . . . . 
H1171 H 0.5503 0.1692 0.2770 0.0777 1.0000 Uiso R . . . . . 
H1172 H 0.5108 0.2463 0.3012 0.0777 1.0000 Uiso R . . . . . 
H1173 H 0.5466 0.2401 0.2275 0.0777 1.0000 Uiso R . . . . . 
H1231 H 0.5893 0.3664 0.5311 0.0788 1.0000 Uiso R . . . . . 
H1232 H 0.6101 0.4440 0.5678 0.0788 1.0000 Uiso R . . . . . 
H1233 H 0.6762 0.3991 0.5277 0.0788 1.0000 Uiso R . . . . . 
H1241 H 0.7095 0.6185 0.4580 0.0728 1.0000 Uiso R . . . . . 
H1242 H 0.6750 0.5860 0.5265 0.0728 1.0000 Uiso R . . . . . 
H1243 H 0.7424 0.5411 0.4880 0.0728 1.0000 Uiso R . . . . . 
H1251 H 0.5729 0.6294 0.3049 0.0683 1.0000 Uiso R . . . . . 
H1252 H 0.5906 0.6681 0.3756 0.0683 1.0000 Uiso R . . . . . 
H1253 H 0.6605 0.6337 0.3322 0.0683 1.0000 Uiso R . . . . . 
H1261 H 0.4480 0.4510 0.3029 0.0763 1.0000 Uiso R . . . . . 
H1262 H 0.4494 0.5412 0.3030 0.0763 1.0000 Uiso R . . . . . 
H1263 H 0.5140 0.4952 0.2622 0.0763 1.0000 Uiso R . . . . . 
H1271 H 0.4484 0.3672 0.3809 0.0804 1.0000 Uiso R . . . . . 
H1272 H 0.4520 0.3704 0.4608 0.0804 1.0000 Uiso R . . . . . 
H1273 H 0.5139 0.3206 0.4202 0.0804 1.0000 Uiso R . . . . . 
loop_
_atom_site_aniso_label
_atom_site_aniso_U_11
_atom_site_aniso_U_22
_atom_site_aniso_U_33
_atom_site_aniso_U_23
_atom_site_aniso_U_13
_atom_site_aniso_U_12
Ti1 0.0256(3) 0.0260(3) 0.0241(3) 0.0038(3) 0.0018(2) -0.0025(3) 
N1 0.0267(14) 0.0380(19) 0.0325(19) -0.0016(15) -0.0014(13) -0.0041(14) 
N2 0.0356(15) 0.0272(18) 0.0262(15) 0.0011(13) 0.0043(13) 0.0025(14) 
N3 0.0333(16) 0.0235(16) 0.0271(17) 0.0039(14) 0.0030(13) 0.0005(13) 
O1 0.0258(12) 0.0507(17) 0.0329(15) -0.0096(13) 0.0029(11) -0.0044(12) 
C1 0.0285(18) 0.051(2) 0.037(2) 0.0023(19) -0.0004(17) 0.0034(17) 
C2 0.037(2) 0.084(4) 0.041(3) -0.003(3) -0.0054(19) -0.008(2) 
C3 0.0323(19) 0.081(3) 0.036(2) 0.002(2) 0.0069(18) -0.0092(19) 
C4 0.049(3) 0.060(3) 0.082(4) -0.005(3) -0.015(3) 0.018(2) 
C5 0.0309(18) 0.033(2) 0.0208(18) 0.0056(16) -0.0023(16) -0.0049(16) 
C6 0.0291(19) 0.027(2) 0.027(2) 0.0013(16) 0.0050(16) -0.0010(15) 
C7 0.037(2) 0.041(3) 0.041(2) 0.011(2) 0.001(2) 0.0035(19) 
C8 0.034(2) 0.037(2) 0.060(3) 0.009(2) 0.013(2) -0.0002(17) 
C9 0.062(3) 0.040(3) 0.037(3) 0.013(2) 0.022(2) 0.010(2) 
C10 0.067(3) 0.058(3) 0.028(2) 0.013(2) 0.004(2) 0.008(3) 
C11 0.045(2) 0.044(2) 0.032(2) 0.0045(19) 0.000(2) -0.0038(19) 
C12 0.0355(19) 0.030(2) 0.028(2) 0.0011(17) 0.0099(16) -0.0017(16) 
C13 0.046(2) 0.043(2) 0.049(2) -0.001(2) 0.0091(18) 0.002(2) 
C14 0.047(2) 0.042(2) 0.042(2) -0.007(2) 0.004(2) -0.0013(19) 
C15 0.046(2) 0.029(2) 0.031(2) -0.0006(18) 0.0090(17) 0.0006(17) 
C16 0.059(2) 0.0297(19) 0.059(3) -0.006(2) -0.006(2) -0.0003(17) 
C17 0.059(3) 0.034(2) 0.069(3) 0.004(2) -0.004(2) 0.0127(19) 
C18 0.0322(18) 0.055(3) 0.0246(18) 0.0136(18) -0.0020(15) -0.0111(18) 
C19 0.0295(17) 0.032(2) 0.043(2) 0.0165(17) 0.0071(16) -0.0008(14) 
C20 0.0326(17) 0.0322(18) 0.034(2) -0.0018(16) 0.0064(16) -0.0112(15) 
C21 0.0231(15) 0.0363(19) 0.0337(19) 0.0084(15) 0.0007(14) -0.0054(14) 
C22 0.0298(16) 0.0329(17) 0.0328(19) -0.0010(17) 0.0094(14) -0.0093(16) 
C23 0.055(2) 0.088(3) 0.0265(18) 0.017(2) -0.0053(19) -0.026(2) 
C24 0.055(3) 0.052(3) 0.087(4) 0.034(3) 0.012(3) 0.009(2) 
C25 0.054(2) 0.054(2) 0.047(2) -0.0098(19) 0.014(2) -0.018(2) 
C26 0.0328(17) 0.055(2) 0.059(3) 0.014(2) -0.0092(16) -0.0015(18) 
C27 0.051(2) 0.042(2) 0.058(3) -0.0118(19) 0.025(2) -0.0115(19) 
Ti101 0.0244(3) 0.0272(3) 0.0264(3) -0.0050(3) 0.0003(3) 0.0031(3) 
N101 0.0262(14) 0.042(2) 0.0311(19) -0.0076(15) -0.0025(12) 0.0056(14) 
N102 0.0333(14) 0.0277(19) 0.0284(16) -0.0024(13) 0.0044(13) 0.0035(14) 
N103 0.0349(16) 0.0241(16) 0.0270(17) -0.0048(14) 0.0018(13) 0.0020(13) 
O101 0.0252(13) 0.076(2) 0.0348(16) 0.0045(15) -0.0060(12) 0.0006(14) 
C101 0.0267(19) 0.059(3) 0.041(2) 0.000(2) -0.0029(18) -0.0015(18) 
C102 0.033(2) 0.112(5) 0.049(3) 0.008(3) -0.011(2) 0.007(3) 
C103 0.037(2) 0.128(5) 0.060(3) -0.028(4) -0.006(2) 0.025(3) 
C104 0.061(3) 0.089(5) 0.116(5) 0.026(4) -0.027(4) -0.037(3) 
C105 0.0281(17) 0.023(2) 0.0263(19) -0.0018(15) -0.0014(15) 0.0020(15) 
C106 0.036(2) 0.028(2) 0.026(2) -0.0075(17) 0.0043(17) -0.0034(16) 
C107 0.037(2) 0.031(2) 0.039(2) 0.0026(19) 0.0036(19) 0.0007(18) 
C108 0.047(2) 0.034(2) 0.056(3) -0.010(2) 0.026(2) 0.0006(18) 
C109 0.071(3) 0.036(2) 0.041(3) -0.015(2) 0.023(2) -0.017(2) 
C110 0.058(3) 0.055(3) 0.039(3) -0.018(2) 0.001(2) -0.014(2) 
C111 0.039(2) 0.050(3) 0.038(2) -0.014(2) -0.004(2) -0.0039(19) 
C112 0.040(2) 0.030(2) 0.037(2) -0.0013(19) 0.0085(18) -0.0030(17) 
C113 0.051(2) 0.036(2) 0.048(2) -0.006(2) 0.0114(18) -0.0118(19) 
C114 0.058(3) 0.047(3) 0.045(3) 0.020(2) 0.002(2) -0.003(2) 
C115 0.044(2) 0.0200(18) 0.038(2) -0.0057(18) 0.0075(17) 0.0027(16) 
C116 0.060(3) 0.035(2) 0.054(3) 0.0113(19) 0.001(2) 0.0026(19) 
C117 0.083(3) 0.040(2) 0.066(3) -0.003(2) -0.012(3) -0.028(2) 
C118 0.041(2) 0.041(2) 0.0295(19) -0.0003(16) 0.0120(16) 0.0157(17) 
C119 0.0317(18) 0.036(2) 0.037(2) -0.0187(17) 0.0012(16) 0.0036(15) 
C120 0.0322(17) 0.0248(18) 0.0372(19) 0.0004(15) 0.0076(15) 0.0072(14) 
C121 0.0246(15) 0.043(2) 0.0320(19) -0.0064(19) -0.0020(15) 0.0072(14) 
C122 0.0292(16) 0.0314(18) 0.051(2) -0.010(2) 0.0155(16) -0.0033(16) 
C123 0.082(3) 0.073(3) 0.030(2) 0.011(2) 0.020(2) 0.033(3) 
C124 0.040(2) 0.067(3) 0.067(3) -0.039(3) -0.0041(19) 0.005(2) 
C125 0.058(3) 0.034(2) 0.073(3) 0.008(2) 0.025(2) 0.0101(19) 
C126 0.033(2) 0.085(3) 0.051(2) -0.015(2) -0.0130(18) 0.012(2) 
C127 0.048(2) 0.038(2) 0.100(4) -0.015(2) 0.034(3) -0.0086(19) 

_refine_ls_extinction_method 
    'None'
_oxford_refine_ls_scale 0.1573(2) 
loop_
 _geom_bond_atom_site_label_1
 _geom_bond_site_symmetry_1
 _geom_bond_atom_site_label_2
 _geom_bond_site_symmetry_2
 _geom_bond_distance
 _geom_bond_publ_flag
Ti1 . N1 . 1.709(3)    yes
Ti1 . N2 . 2.114(3)    yes
Ti1 . N3 . 2.121(3)    yes
Ti1 . C18 . 2.354(4)    yes
Ti1 . C19 . 2.355(3)    yes
Ti1 . C20 . 2.411(3)    yes
Ti1 . C21 . 2.406(3)    yes
Ti1 . C22 . 2.374(3)    yes
N1 . O1 . 1.381(4)    yes
N2 . C5 . 1.333(5)    yes
N2 . C12 . 1.481(5)    yes
N3 . C5 . 1.332(5)    yes
N3 . C15 . 1.465(5)    yes
O1 . C1 . 1.460(5)    yes
C1 . C2 . 1.516(6)    yes
C1 . C3 . 1.512(6)    yes
C1 . C4 . 1.501(7)    yes
C2 . H21 . 0.950    no
C2 . H22 . 0.950    no
C2 . H23 . 0.950    no
C3 . H31 . 0.950    no
C3 . H32 . 0.950    no
C3 . H33 . 0.950    no
C4 . H41 . 0.950    no
C4 . H42 . 0.950    no
C4 . H43 . 0.950    no
C5 . C6 . 1.509(5)    yes
C6 . C7 . 1.395(6)    yes
C6 . C11 . 1.371(6)    yes
C7 . C8 . 1.383(6)    yes
C7 . H71 . 0.950    no
C8 . C9 . 1.378(7)    yes
C8 . H81 . 0.950    no
C9 . C10 . 1.358(7)    yes
C9 . H91 . 0.950    no
C10 . C11 . 1.390(6)    yes
C10 . H101 . 0.950    no
C11 . H111 . 0.950    no
C12 . C13 . 1.519(6)    yes
C12 . C14 . 1.519(6)    yes
C12 . H121 . 0.950    no
C13 . H131 . 0.950    no
C13 . H132 . 0.950    no
C13 . H133 . 0.950    no
C14 . H141 . 0.950    no
C14 . H142 . 0.950    no
C14 . H143 . 0.950    no
C15 . C16 . 1.507(6)    yes
C15 . C17 . 1.525(6)    yes
C15 . H151 . 0.950    no
C16 . H161 . 0.950    no
C16 . H162 . 0.950    no
C16 . H163 . 0.950    no
C17 . H171 . 0.950    no
C17 . H172 . 0.950    no
C17 . H173 . 0.950    no
C18 . C19 . 1.418(6)    yes
C18 . C22 . 1.403(6)    yes
C18 . C23 . 1.511(5)    yes
C19 . C20 . 1.414(5)    yes
C19 . C24 . 1.505(5)    yes
C20 . C21 . 1.407(5)    yes
C20 . C25 . 1.502(5)    yes
C21 . C22 . 1.418(5)    yes
C21 . C26 . 1.501(5)    yes
C22 . C27 . 1.509(5)    yes
C23 . H231 . 0.950    no
C23 . H232 . 0.950    no
C23 . H233 . 0.950    no
C24 . H241 . 0.950    no
C24 . H242 . 0.950    no
C24 . H243 . 0.950    no
C25 . H251 . 0.950    no
C25 . H252 . 0.950    no
C25 . H253 . 0.950    no
C26 . H261 . 0.950    no
C26 . H262 . 0.950    no
C26 . H263 . 0.950    no
C27 . H271 . 0.950    no
C27 . H272 . 0.950    no
C27 . H273 . 0.950    no
Ti101 . N101 . 1.716(3)    yes
Ti101 . N102 . 2.131(3)    yes
Ti101 . N103 . 2.119(3)    yes
Ti101 . C118 . 2.347(4)    yes
Ti101 . C119 . 2.340(4)    yes
Ti101 . C120 . 2.375(3)    yes
Ti101 . C121 . 2.405(3)    yes
Ti101 . C122 . 2.390(3)    yes
N101 . O101 . 1.377(4)    yes
N102 . C105 . 1.341(5)    yes
N102 . C112 . 1.458(5)    yes
N103 . C105 . 1.334(5)    yes
N103 . C115 . 1.470(5)    yes
O101 . C101 . 1.456(5)    yes
C101 . C102 . 1.517(6)    yes
C101 . C103 . 1.494(7)    yes
C101 . C104 . 1.503(8)    yes
C102 . H1021 . 0.950    no
C102 . H1022 . 0.950    no
C102 . H1023 . 0.950    no
C103 . H1031 . 0.950    no
C103 . H1032 . 0.950    no
C103 . H1033 . 0.950    no
C104 . H1041 . 0.950    no
C104 . H1042 . 0.950    no
C104 . H1043 . 0.950    no
C105 . C106 . 1.491(5)    yes
C106 . C107 . 1.388(6)    yes
C106 . C111 . 1.384(6)    yes
C107 . C108 . 1.383(6)    yes
C107 . H1071 . 0.950    no
C108 . C109 . 1.388(7)    yes
C108 . H1081 . 0.950    no
C109 . C110 . 1.382(7)    yes
C109 . H1091 . 0.950    no
C110 . C111 . 1.385(6)    yes
C110 . H1101 . 0.950    no
C111 . H1111 . 0.950    no
C112 . C113 . 1.513(6)    yes
C112 . C114 . 1.532(6)    yes
C112 . H1121 . 0.950    no
C113 . H1131 . 0.950    no
C113 . H1132 . 0.950    no
C113 . H1133 . 0.950    no
C114 . H1141 . 0.950    no
C114 . H1142 . 0.950    no
C114 . H1143 . 0.950    no
C115 . C116 . 1.504(6)    yes
C115 . C117 . 1.505(6)    yes
C115 . H1151 . 0.950    no
C116 . H1161 . 0.950    no
C116 . H1162 . 0.950    no
C116 . H1163 . 0.950    no
C117 . H1171 . 0.950    no
C117 . H1172 . 0.950    no
C117 . H1173 . 0.950    no
C118 . C119 . 1.403(6)    yes
C118 . C122 . 1.407(6)    yes
C118 . C123 . 1.514(6)    yes
C119 . C120 . 1.404(5)    yes
C119 . C124 . 1.509(5)    yes
C120 . C121 . 1.402(5)    yes
C120 . C125 . 1.512(5)    yes
C121 . C122 . 1.409(6)    yes
C121 . C126 . 1.506(5)    yes
C122 . C127 . 1.510(5)    yes
C123 . H1231 . 0.950    no
C123 . H1232 . 0.950    no
C123 . H1233 . 0.950    no
C124 . H1241 . 0.950    no
C124 . H1242 . 0.950    no
C124 . H1243 . 0.950    no
C125 . H1251 . 0.950    no
C125 . H1252 . 0.950    no
C125 . H1253 . 0.950    no
C126 . H1261 . 0.950    no
C126 . H1262 . 0.950    no
C126 . H1263 . 0.950    no
C127 . H1271 . 0.950    no
C127 . H1272 . 0.950    no
C127 . H1273 . 0.950    no
loop_
 _geom_angle_atom_site_label_1
 _geom_angle_site_symmetry_1
 _geom_angle_atom_site_label_2
 _geom_angle_site_symmetry_2
 _geom_angle_atom_site_label_3
 _geom_angle_site_symmetry_3
 _geom_angle
 _geom_angle_publ_flag
N1 . Ti1 . N2 . 109.42(14)    yes
N1 . Ti1 . N3 . 103.18(14)    yes
N2 . Ti1 . N3 . 64.02(12)    yes
N1 . Ti1 . C18 . 91.34(15)    yes
N2 . Ti1 . C18 . 148.09(14)    yes
N3 . Ti1 . C18 . 135.82(14)    yes
N1 . Ti1 . C19 . 107.09(15)    yes
N2 . Ti1 . C19 . 113.55(14)    yes
N3 . Ti1 . C19 . 148.09(13)    yes
C18 . Ti1 . C19 . 35.04(15)    yes
N1 . Ti1 . C20 . 141.55(15)    yes
N2 . Ti1 . C20 . 92.96(12)    yes
N3 . Ti1 . C20 . 114.80(13)    yes
C18 . Ti1 . C20 . 57.41(13)    yes
C19 . Ti1 . C20 . 34.48(13)    yes
N1 . Ti1 . C21 . 145.08(15)    yes
N2 . Ti1 . C21 . 105.50(13)    yes
N3 . Ti1 . C21 . 91.67(12)    yes
C18 . Ti1 . C21 . 57.49(12)    yes
C19 . Ti1 . C21 . 57.35(12)    yes
N1 . Ti1 . C22 . 110.72(14)    yes
N2 . Ti1 . C22 . 139.61(13)    yes
N3 . Ti1 . C22 . 102.14(13)    yes
C18 . Ti1 . C22 . 34.53(14)    yes
C19 . Ti1 . C22 . 57.60(13)    yes
C20 . Ti1 . C21 . 33.97(13)    yes
C20 . Ti1 . C22 . 56.90(13)    yes
C21 . Ti1 . C22 . 34.51(12)    yes
Ti1 . N1 . O1 . 163.8(3)    yes
Ti1 . N2 . C5 . 88.9(2)    yes
Ti1 . N2 . C12 . 144.2(3)    yes
C5 . N2 . C12 . 121.3(3)    yes
Ti1 . N3 . C5 . 88.7(2)    yes
Ti1 . N3 . C15 . 139.6(3)    yes
C5 . N3 . C15 . 121.9(3)    yes
N1 . O1 . C1 . 113.1(3)    yes
O1 . C1 . C2 . 102.4(3)    yes
O1 . C1 . C3 . 110.1(3)    yes
C2 . C1 . C3 . 112.0(4)    yes
O1 . C1 . C4 . 108.4(4)    yes
C2 . C1 . C4 . 111.3(4)    yes
C3 . C1 . C4 . 112.1(4)    yes
C1 . C2 . H21 . 109.7    no
C1 . C2 . H22 . 109.3    no
H21 . C2 . H22 . 109.5    no
C1 . C2 . H23 . 109.4    no
H21 . C2 . H23 . 109.5    no
H22 . C2 . H23 . 109.5    no
C1 . C3 . H31 . 109.4    no
C1 . C3 . H32 . 110.0    no
H31 . C3 . H32 . 109.5    no
C1 . C3 . H33 . 109.0    no
H31 . C3 . H33 . 109.5    no
H32 . C3 . H33 . 109.5    no
C1 . C4 . H41 . 110.7    no
C1 . C4 . H42 . 107.9    no
H41 . C4 . H42 . 109.5    no
C1 . C4 . H43 . 109.8    no
H41 . C4 . H43 . 109.5    no
H42 . C4 . H43 . 109.5    no
N2 . C5 . N3 . 114.8(3)    yes
N2 . C5 . C6 . 122.2(3)    yes
N3 . C5 . C6 . 122.9(3)    yes
C5 . C6 . C7 . 119.5(4)    yes
C5 . C6 . C11 . 121.8(3)    yes
C7 . C6 . C11 . 118.7(4)    yes
C6 . C7 . C8 . 120.3(4)    yes
C6 . C7 . H71 . 120.0    no
C8 . C7 . H71 . 119.8    no
C7 . C8 . C9 . 119.8(4)    yes
C7 . C8 . H81 . 120.6    no
C9 . C8 . H81 . 119.6    no
C8 . C9 . C10 . 120.5(4)    yes
C8 . C9 . H91 . 119.5    no
C10 . C9 . H91 . 120.0    no
C9 . C10 . C11 . 119.8(4)    yes
C9 . C10 . H101 . 120.2    no
C11 . C10 . H101 . 120.0    no
C10 . C11 . C6 . 121.0(4)    yes
C10 . C11 . H111 . 119.8    no
C6 . C11 . H111 . 119.2    no
N2 . C12 . C13 . 108.7(3)    yes
N2 . C12 . C14 . 111.1(3)    yes
C13 . C12 . C14 . 110.4(4)    yes
N2 . C12 . H121 . 108.7    no
C13 . C12 . H121 . 108.9    no
C14 . C12 . H121 . 108.9    no
C12 . C13 . H131 . 109.2    no
C12 . C13 . H132 . 109.7    no
H131 . C13 . H132 . 109.5    no
C12 . C13 . H133 . 109.5    no
H131 . C13 . H133 . 109.5    no
H132 . C13 . H133 . 109.5    no
C12 . C14 . H141 . 109.8    no
C12 . C14 . H142 . 109.4    no
H141 . C14 . H142 . 109.5    no
C12 . C14 . H143 . 109.1    no
H141 . C14 . H143 . 109.5    no
H142 . C14 . H143 . 109.5    no
N3 . C15 . C16 . 109.5(3)    yes
N3 . C15 . C17 . 110.0(3)    yes
C16 . C15 . C17 . 110.3(4)    yes
N3 . C15 . H151 . 109.2    no
C16 . C15 . H151 . 108.6    no
C17 . C15 . H151 . 109.3    no
C15 . C16 . H161 . 110.7    no
C15 . C16 . H162 . 108.3    no
H161 . C16 . H162 . 109.5    no
C15 . C16 . H163 . 109.5    no
H161 . C16 . H163 . 109.5    no
H162 . C16 . H163 . 109.5    no
C15 . C17 . H171 . 110.6    no
C15 . C17 . H172 . 109.0    no
H171 . C17 . H172 . 109.5    no
C15 . C17 . H173 . 108.8    no
H171 . C17 . H173 . 109.5    no
H172 . C17 . H173 . 109.5    no
Ti1 . C18 . C19 . 72.5(2)    yes
Ti1 . C18 . C22 . 73.5(2)    yes
C19 . C18 . C22 . 107.7(3)    yes
Ti1 . C18 . C23 . 120.8(3)    yes
C19 . C18 . C23 . 125.8(4)    yes
C22 . C18 . C23 . 126.4(4)    yes
Ti1 . C19 . C18 . 72.4(2)    yes
Ti1 . C19 . C20 . 74.9(2)    yes
C18 . C19 . C20 . 107.9(3)    yes
Ti1 . C19 . C24 . 121.8(3)    yes
C18 . C19 . C24 . 126.4(4)    yes
C20 . C19 . C24 . 125.5(4)    yes
Ti1 . C20 . C19 . 70.59(19)    yes
Ti1 . C20 . C21 . 72.83(19)    yes
C19 . C20 . C21 . 108.2(3)    yes
Ti1 . C20 . C25 . 125.2(2)    yes
C19 . C20 . C25 . 126.8(4)    yes
C21 . C20 . C25 . 124.9(4)    yes
Ti1 . C21 . C20 . 73.21(19)    yes
Ti1 . C21 . C22 . 71.50(18)    yes
C20 . C21 . C22 . 107.6(3)    yes
Ti1 . C21 . C26 . 122.9(2)    yes
C20 . C21 . C26 . 125.9(4)    yes
C22 . C21 . C26 . 126.5(4)    yes
Ti1 . C22 . C21 . 74.00(19)    yes
Ti1 . C22 . C18 . 72.0(2)    yes
C21 . C22 . C18 . 108.5(3)    yes
Ti1 . C22 . C27 . 122.9(2)    yes
C21 . C22 . C27 . 126.6(4)    yes
C18 . C22 . C27 . 124.7(4)    yes
C18 . C23 . H231 . 109.9    no
C18 . C23 . H232 . 109.7    no
H231 . C23 . H232 . 109.5    no
C18 . C23 . H233 . 108.8    no
H231 . C23 . H233 . 109.5    no
H232 . C23 . H233 . 109.5    no
C19 . C24 . H241 . 109.4    no
C19 . C24 . H242 . 109.7    no
H241 . C24 . H242 . 109.5    no
C19 . C24 . H243 . 109.3    no
H241 . C24 . H243 . 109.5    no
H242 . C24 . H243 . 109.5    no
C20 . C25 . H251 . 109.8    no
C20 . C25 . H252 . 109.6    no
H251 . C25 . H252 . 109.5    no
C20 . C25 . H253 . 109.1    no
H251 . C25 . H253 . 109.5    no
H252 . C25 . H253 . 109.5    no
C21 . C26 . H261 . 110.2    no
C21 . C26 . H262 . 109.0    no
H261 . C26 . H262 . 109.5    no
C21 . C26 . H263 . 109.2    no
H261 . C26 . H263 . 109.5    no
H262 . C26 . H263 . 109.5    no
C22 . C27 . H271 . 109.4    no
C22 . C27 . H272 . 109.5    no
H271 . C27 . H272 . 109.5    no
C22 . C27 . H273 . 109.6    no
H271 . C27 . H273 . 109.5    no
H272 . C27 . H273 . 109.5    no
N101 . Ti101 . N102 . 110.55(14)    yes
N101 . Ti101 . N103 . 103.92(14)    yes
N102 . Ti101 . N103 . 63.99(12)    yes
N101 . Ti101 . C118 . 94.78(15)    yes
N102 . Ti101 . C118 . 152.75(13)    yes
N103 . Ti101 . C118 . 120.62(14)    yes
N101 . Ti101 . C119 . 95.32(14)    yes
N102 . Ti101 . C119 . 128.63(14)    yes
N103 . Ti101 . C119 . 151.01(13)    yes
C118 . Ti101 . C119 . 34.83(14)    yes
N101 . Ti101 . C120 . 125.95(15)    yes
N102 . Ti101 . C120 . 98.06(12)    yes
N103 . Ti101 . C120 . 129.96(12)    yes
C118 . Ti101 . C120 . 57.37(13)    yes
C119 . Ti101 . C120 . 34.64(13)    yes
N101 . Ti101 . C121 . 150.93(14)    yes
N102 . Ti101 . C121 . 95.87(12)    yes
N103 . Ti101 . C121 . 98.35(12)    yes
C118 . Ti101 . C121 . 57.39(13)    yes
C119 . Ti101 . C121 . 57.47(13)    yes
N101 . Ti101 . C122 . 124.72(16)    yes
N102 . Ti101 . C122 . 124.16(13)    yes
N103 . Ti101 . C122 . 93.63(12)    yes
C118 . Ti101 . C122 . 34.55(14)    yes
C119 . Ti101 . C122 . 57.42(13)    yes
C120 . Ti101 . C121 . 34.11(12)    yes
C120 . Ti101 . C122 . 56.72(13)    yes
C121 . Ti101 . C122 . 34.16(14)    yes
Ti101 . N101 . O101 . 161.9(3)    yes
Ti101 . N102 . C105 . 89.0(2)    yes
Ti101 . N102 . C112 . 145.6(3)    yes
C105 . N102 . C112 . 121.2(3)    yes
Ti101 . N103 . C105 . 89.7(2)    yes
Ti101 . N103 . C115 . 139.7(3)    yes
C105 . N103 . C115 . 121.5(3)    yes
N101 . O101 . C101 . 112.4(3)    yes
O101 . C101 . C102 . 103.0(4)    yes
O101 . C101 . C103 . 109.4(4)    yes
C102 . C101 . C103 . 112.3(4)    yes
O101 . C101 . C104 . 108.4(4)    yes
C102 . C101 . C104 . 111.0(5)    yes
C103 . C101 . C104 . 112.2(5)    yes
C101 . C102 . H1021 . 110.2    no
C101 . C102 . H1022 . 109.6    no
H1021 . C102 . H1022 . 109.5    no
C101 . C102 . H1023 . 108.6    no
H1021 . C102 . H1023 . 109.5    no
H1022 . C102 . H1023 . 109.5    no
C101 . C103 . H1031 . 110.9    no
C101 . C103 . H1032 . 106.9    no
H1031 . C103 . H1032 . 109.5    no
C101 . C103 . H1033 . 110.5    no
H1031 . C103 . H1033 . 109.5    no
H1032 . C103 . H1033 . 109.5    no
C101 . C104 . H1041 . 110.6    no
C101 . C104 . H1042 . 109.3    no
H1041 . C104 . H1042 . 109.5    no
C101 . C104 . H1043 . 108.5    no
H1041 . C104 . H1043 . 109.5    no
H1042 . C104 . H1043 . 109.5    no
N102 . C105 . N103 . 114.6(3)    yes
N102 . C105 . C106 . 122.9(3)    yes
N103 . C105 . C106 . 122.3(3)    yes
C105 . C106 . C107 . 120.9(4)    yes
C105 . C106 . C111 . 120.0(3)    yes
C107 . C106 . C111 . 119.1(4)    yes
C106 . C107 . C108 . 119.9(4)    yes
C106 . C107 . H1071 . 119.2    no
C108 . C107 . H1071 . 120.8    no
C107 . C108 . C109 . 121.2(4)    yes
C107 . C108 . H1081 . 119.1    no
C109 . C108 . H1081 . 119.7    no
C108 . C109 . C110 . 118.4(4)    yes
C108 . C109 . H1091 . 120.5    no
C110 . C109 . H1091 . 121.1    no
C109 . C110 . C111 . 120.8(5)    yes
C109 . C110 . H1101 . 119.6    no
C111 . C110 . H1101 . 119.6    no
C110 . C111 . C106 . 120.5(4)    yes
C110 . C111 . H1111 . 120.7    no
C106 . C111 . H1111 . 118.8    no
N102 . C112 . C113 . 110.2(4)    yes
N102 . C112 . C114 . 110.4(3)    yes
C113 . C112 . C114 . 110.8(4)    yes
N102 . C112 . H1121 . 108.5    no
C113 . C112 . H1121 . 108.2    no
C114 . C112 . H1121 . 108.7    no
C112 . C113 . H1131 . 110.2    no
C112 . C113 . H1132 . 109.9    no
H1131 . C113 . H1132 . 109.5    no
C112 . C113 . H1133 . 108.3    no
H1131 . C113 . H1133 . 109.5    no
H1132 . C113 . H1133 . 109.5    no
C112 . C114 . H1141 . 109.6    no
C112 . C114 . H1142 . 108.8    no
H1141 . C114 . H1142 . 109.5    no
C112 . C114 . H1143 . 110.0    no
H1141 . C114 . H1143 . 109.5    no
H1142 . C114 . H1143 . 109.5    no
N103 . C115 . C116 . 109.5(3)    yes
N103 . C115 . C117 . 110.9(3)    yes
C116 . C115 . C117 . 111.6(4)    yes
N103 . C115 . H1151 . 108.5    no
C116 . C115 . H1151 . 108.1    no
C117 . C115 . H1151 . 108.2    no
C115 . C116 . H1161 . 110.4    no
C115 . C116 . H1162 . 109.0    no
H1161 . C116 . H1162 . 109.5    no
C115 . C116 . H1163 . 108.9    no
H1161 . C116 . H1163 . 109.5    no
H1162 . C116 . H1163 . 109.5    no
C115 . C117 . H1171 . 110.2    no
C115 . C117 . H1172 . 109.0    no
H1171 . C117 . H1172 . 109.5    no
C115 . C117 . H1173 . 109.2    no
H1171 . C117 . H1173 . 109.5    no
H1172 . C117 . H1173 . 109.5    no
Ti101 . C118 . C119 . 72.3(2)    yes
Ti101 . C118 . C122 . 74.4(2)    yes
C119 . C118 . C122 . 107.9(3)    yes
Ti101 . C118 . C123 . 120.7(3)    yes
C119 . C118 . C123 . 125.1(4)    yes
C122 . C118 . C123 . 126.9(4)    yes
Ti101 . C119 . C118 . 72.9(2)    yes
Ti101 . C119 . C120 . 74.0(2)    yes
C118 . C119 . C120 . 107.7(3)    yes
Ti101 . C119 . C124 . 121.8(2)    yes
C118 . C119 . C124 . 125.5(4)    yes
C120 . C119 . C124 . 126.7(4)    yes
Ti101 . C120 . C119 . 71.3(2)    yes
Ti101 . C120 . C121 . 74.13(19)    yes
C119 . C120 . C121 . 108.8(3)    yes
Ti101 . C120 . C125 . 125.5(2)    yes
C119 . C120 . C125 . 126.2(4)    yes
C121 . C120 . C125 . 124.7(4)    yes
Ti101 . C121 . C120 . 71.76(18)    yes
Ti101 . C121 . C122 . 72.34(19)    yes
C120 . C121 . C122 . 107.3(3)    yes
Ti101 . C121 . C126 . 121.5(3)    yes
C120 . C121 . C126 . 126.9(4)    yes
C122 . C121 . C126 . 125.9(4)    yes
Ti101 . C122 . C121 . 73.50(19)    yes
Ti101 . C122 . C118 . 71.06(19)    yes
C121 . C122 . C118 . 108.3(3)    yes
Ti101 . C122 . C127 . 124.0(3)    yes
C121 . C122 . C127 . 125.5(4)    yes
C118 . C122 . C127 . 126.1(4)    yes
C118 . C123 . H1231 . 109.0    no
C118 . C123 . H1232 . 109.2    no
H1231 . C123 . H1232 . 109.5    no
C118 . C123 . H1233 . 110.2    no
H1231 . C123 . H1233 . 109.5    no
H1232 . C123 . H1233 . 109.5    no
C119 . C124 . H1241 . 109.8    no
C119 . C124 . H1242 . 109.1    no
H1241 . C124 . H1242 . 109.5    no
C119 . C124 . H1243 . 109.5    no
H1241 . C124 . H1243 . 109.5    no
H1242 . C124 . H1243 . 109.5    no
C120 . C125 . H1251 . 110.3    no
C120 . C125 . H1252 . 108.0    no
H1251 . C125 . H1252 . 109.5    no
C120 . C125 . H1253 . 110.1    no
H1251 . C125 . H1253 . 109.5    no
H1252 . C125 . H1253 . 109.5    no
C121 . C126 . H1261 . 110.0    no
C121 . C126 . H1262 . 110.0    no
H1261 . C126 . H1262 . 109.5    no
C121 . C126 . H1263 . 108.4    no
H1261 . C126 . H1263 . 109.5    no
H1262 . C126 . H1263 . 109.5    no
C122 . C127 . H1271 . 109.2    no
C122 . C127 . H1272 . 109.5    no
H1271 . C127 . H1272 . 109.5    no
C122 . C127 . H1273 . 109.7    no
H1271 . C127 . H1273 . 109.5    no
H1272 . C127 . H1273 . 109.5    no


#===end

data_compound_22

# local code ADS189

_chemical_name_systematic         
;
Cp*Ti{PhC(NiPr)2}{OC(NOtBu)N(Tol)C(NTol)O}

;
_chemical_melting_point           ?


_refine_special_details 
; 
H atoms were placed geometrically with reference to a Fourier difference 
map and refined in a riding model.
; 
_cell_length_a                    10.8924(4)
_cell_length_b                    11.4025(4)
_cell_length_c                    18.6552(6)
_cell_angle_alpha                 72.928(3)
_cell_angle_beta                  79.432(3)
_cell_angle_gamma                 68.018(3)
_cell_volume                      2046.79(13)
 
_symmetry_cell_setting            'Triclinic' 
_symmetry_space_group_name_H-M    'P -1 ' 
_symmetry_space_group_name_Hall   '-P 1' 
loop_
 _symmetry_equiv_pos_as_xyz
 'x,y,z'
 '-x,-y,-z'

loop_
_atom_type_symbol
_atom_type_scat_dispersion_real
_atom_type_scat_dispersion_imag
_atom_type_scat_Cromer_Mann_a1
_atom_type_scat_Cromer_Mann_b1
_atom_type_scat_Cromer_Mann_a2
_atom_type_scat_Cromer_Mann_b2
_atom_type_scat_Cromer_Mann_a3
_atom_type_scat_Cromer_Mann_b3
_atom_type_scat_Cromer_Mann_a4
_atom_type_scat_Cromer_Mann_b4
_atom_type_scat_Cromer_Mann_c
_atom_type_scat_source  
 C       0.0181   0.0091   2.3100  20.8439   1.0200  10.2075   1.5886   0.5687
   0.8650  51.6512   0.2156 'International Tables Vol C 4.2.6.8 and 6.1.1.4'
 H       0.0000   0.0000   0.4930  10.5109   0.3229  26.1257   0.1402   3.1424
   0.0408  57.7998   0.0030 'International Tables Vol C 4.2.6.8 and 6.1.1.4'
 N       0.0311   0.0180  12.2126   0.0057   3.1322   9.8933   2.0125  28.9975
   1.1663   0.5826 -11.5290 'International Tables Vol C 4.2.6.8 and 6.1.1.4'
 O       0.0492   0.0322   3.0485  13.2771   2.2868   5.7011   1.5463   0.3239
   0.8670  32.9089   0.2508 'International Tables Vol C 4.2.6.8 and 6.1.1.4'
 Ti      0.2191   1.8069   9.7595   7.8508   7.3558   0.5000   1.6991  35.6338
   1.9021 116.1050   1.2807 'International Tables Vol C 4.2.6.8 and 6.1.1.4'
 
 
_cell_formula_units_Z                    2


_chemical_formula_sum             'C43 H57 N5 O3 Ti1'
_chemical_formula_moiety          'C43 H57 N5 O3 Ti1'
_chemical_compound_source                ?
_chemical_formula_weight            739.86
 
 
_cell_measurement_reflns_used        11089
_cell_measurement_theta_min              4
_cell_measurement_theta_max             76
_cell_measurement_temperature          150
 
_exptl_crystal_description        'block' 
_exptl_crystal_colour             'orange' 
_exptl_crystal_size_min           0.200 
_exptl_crystal_size_mid           0.200 
_exptl_crystal_size_max           0.200 
 
_exptl_crystal_density_diffrn     1.200 
_exptl_crystal_density_meas       ? 
_exptl_crystal_density_method     'not measured' 
_exptl_crystal_F_000              792 
_exptl_absorpt_coefficient_mu     2.109 
 
_exptl_absorpt_correction_type    multi-scan 
_exptl_absorpt_process_details    'CrysAlis, (Oxford Diffraction, 2002)' 
_exptl_absorpt_correction_T_min   0.66 
_exptl_absorpt_correction_T_max   0.66 
_diffrn_measurement_device_type   'Oxford Diffraction SuperNova' 
_diffrn_measurement_device        'Area' 
_diffrn_radiation_monochromator   'graphite' 
_diffrn_radiation_type            'Cu K\a'
_diffrn_radiation_wavelength           1.54184
_diffrn_measurement_method        \w 
 
_computing_data_collection        'SuperNova, (Oxford Diffraction, 2010)' 
_computing_cell_refinement        'CrysAlis, (Oxford Diffraction, 2002)' 
_computing_data_reduction         'CrysAlis, (Oxford Diffraction, 2002)' 
_computing_structure_solution     'SIR92 (Altomare et al., 1994)' 
_computing_structure_refinement   'CRYSTALS (Betteridge et al., 2003)' 
_computing_publication_material   'CRYSTALS (Betteridge et al., 2003)' 
_computing_molecular_graphics     'CAMERON (Watkin et al., 1996)' 
 
_diffrn_standards_interval_time   . 
_diffrn_standards_interval_count  . 
_diffrn_standards_number          0 
_diffrn_standards_decay_%         ? 
 
_diffrn_ambient_temperature        150
_diffrn_reflns_number             20801 
_reflns_number_total              8469 
_diffrn_reflns_av_R_equivalents   0.026 
 
 
_diffrn_reflns_theta_min          4.315 
_diffrn_reflns_theta_max          76.262 
_diffrn_measured_fraction_theta_max 0.986 
 
_diffrn_reflns_theta_full         73.974 
_diffrn_measured_fraction_theta_full 0.996 
 
 
_diffrn_reflns_limit_h_min        -13 
_diffrn_reflns_limit_h_max        13 
_diffrn_reflns_limit_k_min        -14 
_diffrn_reflns_limit_k_max        14 
_diffrn_reflns_limit_l_min        -23 
_diffrn_reflns_limit_l_max        19 
_reflns_limit_h_min               -13 
_reflns_limit_h_max               13 
_reflns_limit_k_min               -13 
_reflns_limit_k_max               14 
_reflns_limit_l_min               0 
_reflns_limit_l_max               23 
 
_oxford_diffrn_Wilson_B_factor    1.91 
_oxford_diffrn_Wilson_scale       0.03 
 
_atom_sites_solution_primary      Direct
_atom_sites_solution_secondary  difmap
_atom_sites_solution_hydrogens    geom
 
_refine_diff_density_min          -0.41 
_refine_diff_density_max          0.28 
 
 
# The current dictionary definitions do not cover the 
# situation where the reflections used for refinement were 
# selected by a user-defined sigma threshold 
 
 
# The values actually used during refinement 
_oxford_reflns_threshold_expression_ref     I>3.0\s(I)
_refine_ls_number_reflns          7291 
_refine_ls_number_restraints      0 
_refine_ls_number_parameters      469 
_oxford_refine_ls_R_factor_ref    0.0388 
_refine_ls_wR_factor_ref          0.0431 
_refine_ls_goodness_of_fit_ref    1.0661 
_refine_ls_shift/su_max           0.0017559 
_refine_ls_shift/su_mean          0.0000642 
 
 
# The values computed from all data 
_oxford_reflns_number_all         8435 
_refine_ls_R_factor_all           0.0468 
_refine_ls_wR_factor_all          0.0465 
 
# The values computed with a 2 sigma cutoff - a la SHELX 
_reflns_threshold_expression      I>2.0\s(I)
_reflns_number_gt                 7624 
_refine_ls_R_factor_gt            0.0413 
_refine_ls_wR_factor_gt           0.0438 
 
_chemical_absolute_configuration  '.' 
 
 
_refine_ls_structure_factor_coef  F 
_refine_ls_matrix_type            full
_refine_ls_hydrogen_treatment     none          
_refine_ls_weighting_scheme       calc 
_refine_ls_weighting_details 
;
 Method, part 1, Chebychev polynomial, (Watkin, 1994, Prince, 1982) 
 [weight] = 1.0/[A~0~*T~0~(x)+A~1~*T~1~(x) ... +A~n-1~]*T~n-1~(x)] 
 where A~i~ are the Chebychev coefficients listed below and x= Fcalc/Fmax 
 Method = Robust Weighting (Prince, 1982) 
 W = [weight] * [1-(deltaF/6*sigmaF)^2^]^2^ 
 A~i~ are: 
 14.2 2.34 11.6 3.15 
;
_publ_section_references 
; 
Oxford Diffraction, (2010). CrysAlisPro. 
 
Oxford Diffraction, (2010). Supernova User Manual. 
 
Betteridge, P.W., Carruthers, J.R., Cooper, R.I., 
Prout, K. & Watkin, D.J. (2003). J. Appl. Cryst. 36, 1487. 
 
Watkin, D.J., Prout, C.K. & Pearce, L.J. (1996). CAMERON, Chemical 
Crystallography Laboratory, Oxford, UK. 
 
Altomare, A., Cascarano, G., Giacovazzo, C., Guagliardi, A., Burla, M.C., 
Polidori, G. & Camalli, M. (1994). J. Appl. Cryst. 27, 435. 
 
Watkin D.J. (1994). 
Acta Cryst, A50, 411-437. 
 
Prince, E. 
Mathematical Techniques in Crystallography 
and Materials Science 
Springer-Verlag, New York, 1982. 
; 

# Uequiv = arithmetic mean of Ui i.e. Ueqiv = (U1+U2+U3)/3


loop_
_atom_site_label
_atom_site_type_symbol
_atom_site_fract_x
_atom_site_fract_y
_atom_site_fract_z
_atom_site_U_iso_or_equiv
_atom_site_occupancy
_atom_site_adp_type
_atom_site_refinement_flags_posn
_atom_site_refinement_flags_adp
_atom_site_refinement_flags_occupancy
_atom_site_disorder_assembly
_atom_site_disorder_group
_atom_site_attached_hydrogens
Ti1 Ti 0.44388(2) 0.796484(19) 0.762824(11) 0.0174 1.0000 Uani . . . . . . 
O1 O 0.20845(9) 1.22527(8) 0.65705(5) 0.0268 1.0000 Uani . . . . . . 
O2 O 0.36877(9) 0.89320(8) 0.66866(5) 0.0226 1.0000 Uani . . . . . . 
O3 O 0.26361(8) 0.86886(8) 0.80717(5) 0.0221 1.0000 Uani . . . . . . 
N1 N 0.31235(10) 1.11335(10) 0.64041(6) 0.0244 1.0000 Uani . . . . . . 
N2 N 0.49682(10) 0.84625(10) 0.84808(6) 0.0209 1.0000 Uani . . . . . . 
N3 N 0.59337(10) 0.88049(10) 0.73309(6) 0.0225 1.0000 Uani . . . . . . 
N4 N 0.15380(10) 1.01257(10) 0.70675(6) 0.0230 1.0000 Uani . . . . . . 
N5 N 0.03689(11) 0.91273(11) 0.80687(6) 0.0278 1.0000 Uani . . . . . . 
C1 C 0.21327(13) 1.34293(12) 0.60063(8) 0.0282 1.0000 Uani . . . . . . 
C2 C 0.34934(16) 1.35521(16) 0.59290(12) 0.0474 1.0000 Uani . . . . . . 
C3 C 0.17695(19) 1.34135(16) 0.52637(9) 0.0416 1.0000 Uani . . . . . . 
C4 C 0.10651(18) 1.44957(15) 0.63271(10) 0.0432 1.0000 Uani . . . . . . 
C5 C 0.28047(12) 1.01084(12) 0.67094(7) 0.0215 1.0000 Uani . . . . . . 
C6 C 0.14827(12) 0.92649(11) 0.77758(7) 0.0219 1.0000 Uani . . . . . . 
C7 C 0.04373(12) 1.08072(12) 0.66173(7) 0.0229 1.0000 Uani . . . . . . 
C8 C 0.05895(13) 1.06972(13) 0.58819(7) 0.0270 1.0000 Uani . . . . . . 
C9 C -0.04562(14) 1.13817(14) 0.54226(8) 0.0304 1.0000 Uani . . . . . . 
C10 C -0.16719(14) 1.21472(13) 0.56955(8) 0.0314 1.0000 Uani . . . . . . 
C11 C -0.18065(14) 1.22536(14) 0.64331(8) 0.0334 1.0000 Uani . . . . . . 
C12 C -0.07616(13) 1.16010(13) 0.68933(8) 0.0289 1.0000 Uani . . . . . . 
C13 C -0.28331(16) 1.28106(17) 0.52129(10) 0.0438 1.0000 Uani . . . . . . 
C14 C 0.02494(12) 0.83859(13) 0.88116(8) 0.0273 1.0000 Uani . . . . . . 
C15 C 0.05589(14) 0.86458(14) 0.94271(8) 0.0323 1.0000 Uani . . . . . . 
C16 C 0.02827(16) 0.79767(16) 1.01591(9) 0.0391 1.0000 Uani . . . . . . 
C17 C -0.03159(16) 0.70363(15) 1.03029(9) 0.0397 1.0000 Uani . . . . . . 
C18 C -0.06108(15) 0.67699(14) 0.96872(9) 0.0370 1.0000 Uani . . . . . . 
C19 C -0.03361(14) 0.74276(14) 0.89516(9) 0.0323 1.0000 Uani . . . . . . 
C20 C -0.0665(2) 0.6357(2) 1.10994(10) 0.0576 1.0000 Uani . . . . . . 
C21 C 0.55913(11) 0.91913(11) 0.79693(7) 0.0206 1.0000 Uani . . . . . . 
C22 C 0.58044(12) 1.03595(12) 0.80617(7) 0.0231 1.0000 Uani . . . . . . 
C23 C 0.49253(15) 1.16039(13) 0.77705(8) 0.0316 1.0000 Uani . . . . . . 
C24 C 0.51226(17) 1.26898(14) 0.78526(9) 0.0398 1.0000 Uani . . . . . . 
C25 C 0.61860(18) 1.25476(15) 0.82137(9) 0.0394 1.0000 Uani . . . . . . 
C26 C 0.70709(15) 1.13172(15) 0.84946(8) 0.0344 1.0000 Uani . . . . . . 
C27 C 0.68813(13) 1.02179(13) 0.84194(8) 0.0274 1.0000 Uani . . . . . . 
C28 C 0.43065(13) 0.86879(13) 0.92155(7) 0.0258 1.0000 Uani . . . . . . 
C29 C 0.53300(16) 0.82973(15) 0.97823(8) 0.0341 1.0000 Uani . . . . . . 
C30 C 0.33004(14) 1.00596(14) 0.91935(8) 0.0324 1.0000 Uani . . . . . . 
C31 C 0.66604(13) 0.94504(13) 0.66824(7) 0.0272 1.0000 Uani . . . . . . 
C32 C 0.63985(16) 0.92975(16) 0.59466(8) 0.0351 1.0000 Uani . . . . . . 
C33 C 0.81430(15) 0.88917(15) 0.67894(9) 0.0354 1.0000 Uani . . . . . . 
C34 C 0.56744(14) 0.57909(12) 0.82329(7) 0.0270 1.0000 Uani . . . . . . 
C35 C 0.61409(13) 0.59545(11) 0.74590(8) 0.0250 1.0000 Uani . . . . . . 
C36 C 0.50709(13) 0.61869(11) 0.70468(7) 0.0243 1.0000 Uani . . . . . . 
C37 C 0.39396(13) 0.61692(12) 0.75642(8) 0.0252 1.0000 Uani . . . . . . 
C38 C 0.43223(14) 0.58979(12) 0.82975(7) 0.0275 1.0000 Uani . . . . . . 
C39 C 0.6520(2) 0.54399(15) 0.88650(10) 0.0469 1.0000 Uani . . . . . . 
C40 C 0.75611(14) 0.57284(15) 0.71645(10) 0.0382 1.0000 Uani . . . . . . 
C41 C 0.51136(17) 0.63719(15) 0.62151(8) 0.0366 1.0000 Uani . . . . . . 
C42 C 0.25987(15) 0.63691(15) 0.73540(11) 0.0403 1.0000 Uani . . . . . . 
C43 C 0.34577(19) 0.57111(15) 0.90171(9) 0.0433 1.0000 Uani . . . . . . 
H21 H 0.3511 1.4325 0.5559 0.0590 1.0000 Uiso R . . . . . 
H22 H 0.3679 1.3588 0.6399 0.0590 1.0000 Uiso R . . . . . 
H23 H 0.4144 1.2815 0.5781 0.0590 1.0000 Uiso R . . . . . 
H31 H 0.1800 1.4182 0.4895 0.0520 1.0000 Uiso R . . . . . 
H32 H 0.0899 1.3376 0.5325 0.0520 1.0000 Uiso R . . . . . 
H33 H 0.2384 1.2669 0.5107 0.0520 1.0000 Uiso R . . . . . 
H41 H 0.1008 1.5324 0.5998 0.0527 1.0000 Uiso R . . . . . 
H42 H 0.1284 1.4456 0.6806 0.0527 1.0000 Uiso R . . . . . 
H43 H 0.0235 1.4372 0.6380 0.0527 1.0000 Uiso R . . . . . 
H81 H 0.1410 1.0156 0.5693 0.0339 1.0000 Uiso R . . . . . 
H91 H -0.0335 1.1323 0.4915 0.0378 1.0000 Uiso R . . . . . 
H111 H -0.2628 1.2789 0.6624 0.0409 1.0000 Uiso R . . . . . 
H121 H -0.0864 1.1692 0.7393 0.0361 1.0000 Uiso R . . . . . 
H131 H -0.3581 1.3291 0.5487 0.0551 1.0000 Uiso R . . . . . 
H132 H -0.2607 1.3386 0.4770 0.0551 1.0000 Uiso R . . . . . 
H133 H -0.3042 1.2168 0.5079 0.0551 1.0000 Uiso R . . . . . 
H151 H 0.0959 0.9290 0.9346 0.0403 1.0000 Uiso R . . . . . 
H161 H 0.0506 0.8168 1.0571 0.0489 1.0000 Uiso R . . . . . 
H181 H -0.1012 0.6126 0.9769 0.0448 1.0000 Uiso R . . . . . 
H191 H -0.0546 0.7224 0.8541 0.0402 1.0000 Uiso R . . . . . 
H201 H -0.1059 0.5748 1.1088 0.0721 1.0000 Uiso R . . . . . 
H202 H -0.1276 0.6988 1.1350 0.0721 1.0000 Uiso R . . . . . 
H203 H 0.0116 0.5912 1.1361 0.0721 1.0000 Uiso R . . . . . 
H231 H 0.4200 1.1704 0.7516 0.0388 1.0000 Uiso R . . . . . 
H241 H 0.4517 1.3537 0.7663 0.0483 1.0000 Uiso R . . . . . 
H251 H 0.6314 1.3296 0.8268 0.0479 1.0000 Uiso R . . . . . 
H261 H 0.7808 1.1223 0.8738 0.0429 1.0000 Uiso R . . . . . 
H271 H 0.7484 0.9371 0.8615 0.0341 1.0000 Uiso R . . . . . 
H281 H 0.3818 0.8107 0.9399 0.0329 1.0000 Uiso R . . . . . 
H291 H 0.4888 0.8444 1.0253 0.0427 1.0000 Uiso R . . . . . 
H292 H 0.5893 0.8807 0.9600 0.0427 1.0000 Uiso R . . . . . 
H293 H 0.5848 0.7399 0.9843 0.0427 1.0000 Uiso R . . . . . 
H301 H 0.2922 1.0118 0.9688 0.0410 1.0000 Uiso R . . . . . 
H302 H 0.3739 1.0680 0.8992 0.0410 1.0000 Uiso R . . . . . 
H303 H 0.2618 1.0233 0.8885 0.0410 1.0000 Uiso R . . . . . 
H311 H 0.6351 1.0355 0.6664 0.0341 1.0000 Uiso R . . . . . 
H321 H 0.6870 0.9717 0.5537 0.0445 1.0000 Uiso R . . . . . 
H322 H 0.5473 0.9681 0.5886 0.0445 1.0000 Uiso R . . . . . 
H323 H 0.6685 0.8396 0.5961 0.0445 1.0000 Uiso R . . . . . 
H331 H 0.8609 0.9307 0.6374 0.0443 1.0000 Uiso R . . . . . 
H332 H 0.8281 0.9039 0.7239 0.0443 1.0000 Uiso R . . . . . 
H333 H 0.8462 0.7980 0.6825 0.0443 1.0000 Uiso R . . . . . 
H391 H 0.5987 0.5387 0.9329 0.0575 1.0000 Uiso R . . . . . 
H392 H 0.6906 0.6092 0.8795 0.0575 1.0000 Uiso R . . . . . 
H393 H 0.7203 0.4621 0.8871 0.0575 1.0000 Uiso R . . . . . 
H401 H 0.7631 0.5896 0.6632 0.0470 1.0000 Uiso R . . . . . 
H402 H 0.7870 0.6299 0.7305 0.0470 1.0000 Uiso R . . . . . 
H403 H 0.8084 0.4849 0.7369 0.0470 1.0000 Uiso R . . . . . 
H421 H 0.2008 0.6311 0.7796 0.0507 1.0000 Uiso R . . . . . 
H422 H 0.2268 0.7207 0.7022 0.0507 1.0000 Uiso R . . . . . 
H423 H 0.2670 0.5717 0.7113 0.0507 1.0000 Uiso R . . . . . 
H431 H 0.2595 0.5836 0.8905 0.0549 1.0000 Uiso R . . . . . 
H432 H 0.3400 0.6328 0.9282 0.0549 1.0000 Uiso R . . . . . 
H433 H 0.3829 0.4853 0.9319 0.0549 1.0000 Uiso R . . . . . 
H411 H 0.5980 0.6335 0.5992 0.0430 1.0000 Uiso R . . . . . 
H412 H 0.4490 0.7195 0.6004 0.0430 1.0000 Uiso R . . . . . 
H413 H 0.4899 0.5699 0.6121 0.0430 1.0000 Uiso R . . . . . 
loop_
_atom_site_aniso_label
_atom_site_aniso_U_11
_atom_site_aniso_U_22
_atom_site_aniso_U_33
_atom_site_aniso_U_23
_atom_site_aniso_U_13
_atom_site_aniso_U_12
Ti1 0.01983(11) 0.01423(11) 0.01831(11) -0.00302(7) -0.00319(7) -0.00613(8) 
O1 0.0274(4) 0.0191(4) 0.0295(5) -0.0031(3) 0.0015(4) -0.0070(3) 
O2 0.0237(4) 0.0202(4) 0.0212(4) -0.0027(3) -0.0026(3) -0.0058(3) 
O3 0.0208(4) 0.0229(4) 0.0209(4) -0.0032(3) -0.0030(3) -0.0066(3) 
N1 0.0212(5) 0.0210(5) 0.0284(5) -0.0033(4) -0.0014(4) -0.0065(4) 
N2 0.0239(5) 0.0205(5) 0.0202(5) -0.0056(4) -0.0023(4) -0.0090(4) 
N3 0.0248(5) 0.0211(5) 0.0229(5) -0.0051(4) 0.0010(4) -0.0109(4) 
N4 0.0203(5) 0.0224(5) 0.0236(5) 0.0003(4) -0.0030(4) -0.0082(4) 
N5 0.0236(5) 0.0265(5) 0.0287(5) 0.0032(4) -0.0033(4) -0.0104(4) 
C1 0.0281(6) 0.0197(6) 0.0329(7) -0.0003(5) -0.0029(5) -0.0084(5) 
C2 0.0359(8) 0.0309(8) 0.0682(11) 0.0113(7) -0.0111(7) -0.0182(6) 
C3 0.0552(10) 0.0312(7) 0.0329(7) -0.0010(6) -0.0086(7) -0.0115(7) 
C4 0.0476(9) 0.0248(7) 0.0495(9) -0.0092(6) 0.0013(7) -0.0062(6) 
C5 0.0213(5) 0.0217(6) 0.0202(5) -0.0021(4) -0.0040(4) -0.0071(4) 
C6 0.0226(6) 0.0186(5) 0.0236(6) -0.0020(4) -0.0040(4) -0.0075(4) 
C7 0.0214(6) 0.0206(5) 0.0252(6) 0.0003(4) -0.0045(5) -0.0089(5) 
C8 0.0261(6) 0.0270(6) 0.0278(6) -0.0050(5) -0.0036(5) -0.0095(5) 
C9 0.0342(7) 0.0330(7) 0.0265(6) -0.0018(5) -0.0080(5) -0.0159(6) 
C10 0.0282(7) 0.0277(6) 0.0358(7) 0.0052(5) -0.0107(5) -0.0129(5) 
C11 0.0245(6) 0.0297(7) 0.0360(7) 0.0007(5) -0.0041(5) -0.0043(5) 
C12 0.0260(6) 0.0275(6) 0.0275(6) -0.0021(5) -0.0023(5) -0.0065(5) 
C13 0.0367(8) 0.0420(8) 0.0471(9) 0.0097(7) -0.0206(7) -0.0149(7) 
C14 0.0194(6) 0.0233(6) 0.0306(6) 0.0013(5) -0.0003(5) -0.0046(5) 
C15 0.0306(7) 0.0293(7) 0.0322(7) -0.0034(5) 0.0011(5) -0.0098(5) 
C16 0.0411(8) 0.0381(8) 0.0298(7) -0.0053(6) 0.0022(6) -0.0091(6) 
C17 0.0363(8) 0.0308(7) 0.0351(8) 0.0021(6) 0.0065(6) -0.0048(6) 
C18 0.0307(7) 0.0250(6) 0.0442(8) 0.0042(6) 0.0025(6) -0.0096(5) 
C19 0.0267(6) 0.0267(6) 0.0377(7) 0.0018(5) -0.0038(5) -0.0096(5) 
C20 0.0645(12) 0.0482(10) 0.0385(9) 0.0061(8) 0.0115(8) -0.0153(9) 
C21 0.0186(5) 0.0171(5) 0.0256(6) -0.0049(4) -0.0040(4) -0.0046(4) 
C22 0.0250(6) 0.0198(6) 0.0257(6) -0.0082(4) 0.0018(5) -0.0089(5) 
C23 0.0343(7) 0.0212(6) 0.0363(7) -0.0056(5) -0.0046(6) -0.0066(5) 
C24 0.0533(9) 0.0181(6) 0.0425(8) -0.0073(6) 0.0004(7) -0.0082(6) 
C25 0.0589(10) 0.0302(7) 0.0396(8) -0.0170(6) 0.0106(7) -0.0271(7) 
C26 0.0395(8) 0.0407(8) 0.0357(7) -0.0187(6) 0.0061(6) -0.0253(6) 
C27 0.0266(6) 0.0272(6) 0.0322(6) -0.0115(5) 0.0006(5) -0.0118(5) 
C28 0.0299(6) 0.0276(6) 0.0233(6) -0.0094(5) 0.0018(5) -0.0130(5) 
C29 0.0423(8) 0.0378(7) 0.0233(6) -0.0081(5) -0.0050(5) -0.0136(6) 
C30 0.0313(7) 0.0341(7) 0.0345(7) -0.0174(6) 0.0021(5) -0.0096(6) 
C31 0.0321(7) 0.0236(6) 0.0273(6) -0.0068(5) 0.0049(5) -0.0141(5) 
C32 0.0400(8) 0.0423(8) 0.0241(6) -0.0073(6) 0.0054(5) -0.0196(6) 
C33 0.0317(7) 0.0387(8) 0.0397(8) -0.0106(6) 0.0069(6) -0.0202(6) 
C34 0.0357(7) 0.0151(5) 0.0277(6) -0.0039(5) -0.0096(5) -0.0038(5) 
C35 0.0263(6) 0.0167(5) 0.0318(6) -0.0073(5) -0.0046(5) -0.0053(5) 
C36 0.0296(6) 0.0174(5) 0.0276(6) -0.0084(4) -0.0039(5) -0.0070(5) 
C37 0.0282(6) 0.0169(5) 0.0340(6) -0.0081(5) -0.0030(5) -0.0099(5) 
C38 0.0365(7) 0.0146(5) 0.0282(6) -0.0029(4) 0.0005(5) -0.0085(5) 
C39 0.0655(11) 0.0255(7) 0.0441(9) -0.0083(6) -0.0327(8) 0.0037(7) 
C40 0.0262(7) 0.0271(7) 0.0580(9) -0.0121(6) -0.0006(6) -0.0055(5) 
C41 0.0486(9) 0.0341(7) 0.0294(7) -0.0139(6) -0.0051(6) -0.0113(6) 
C42 0.0308(7) 0.0316(7) 0.0668(10) -0.0194(7) -0.0081(7) -0.0124(6) 
C43 0.0572(10) 0.0250(7) 0.0351(8) 0.0007(6) 0.0111(7) -0.0131(7) 

_refine_ls_extinction_method 
    'None'
_oxford_refine_ls_scale 5.816(7) 
loop_
 _geom_bond_atom_site_label_1
 _geom_bond_site_symmetry_1
 _geom_bond_atom_site_label_2
 _geom_bond_site_symmetry_2
 _geom_bond_distance
 _geom_bond_publ_flag
Ti1 . O2 . 1.9197(9)    yes
Ti1 . O3 . 1.9527(9)    yes
Ti1 . N2 . 2.0726(10)    yes
Ti1 . N3 . 2.0979(10)    yes
Ti1 . C34 . 2.3761(12)    yes
Ti1 . C35 . 2.4125(12)    yes
Ti1 . C36 . 2.3944(12)    yes
Ti1 . C37 . 2.3459(12)    yes
Ti1 . C38 . 2.3596(12)    yes
O1 . N1 . 1.4242(14)    yes
O1 . C1 . 1.4539(15)    yes
O2 . C5 . 1.3337(15)    yes
O3 . C6 . 1.3184(15)    yes
N1 . C5 . 1.2851(17)    yes
N2 . C21 . 1.3345(16)    yes
N2 . C28 . 1.4731(15)    yes
N3 . C21 . 1.3318(16)    yes
N3 . C31 . 1.4812(16)    yes
N4 . C5 . 1.4141(16)    yes
N4 . C6 . 1.4024(15)    yes
N4 . C7 . 1.4267(16)    yes
N5 . C6 . 1.2822(17)    yes
N5 . C14 . 1.4073(17)    yes
C1 . C2 . 1.517(2)    yes
C1 . C3 . 1.516(2)    yes
C1 . C4 . 1.517(2)    yes
C2 . H21 . 0.950    no
C2 . H22 . 0.950    no
C2 . H23 . 0.950    no
C3 . H31 . 0.950    no
C3 . H32 . 0.950    no
C3 . H33 . 0.950    no
C4 . H41 . 0.950    no
C4 . H42 . 0.950    no
C4 . H43 . 0.950    no
C7 . C8 . 1.3883(18)    yes
C7 . C12 . 1.3899(18)    yes
C8 . C9 . 1.3930(19)    yes
C8 . H81 . 0.950    no
C9 . C10 . 1.387(2)    yes
C9 . H91 . 0.950    no
C10 . C11 . 1.393(2)    yes
C10 . C13 . 1.5113(19)    yes
C11 . C12 . 1.3912(19)    yes
C11 . H111 . 0.950    no
C12 . H121 . 0.950    no
C13 . H131 . 0.950    no
C13 . H132 . 0.950    no
C13 . H133 . 0.950    no
C14 . C15 . 1.392(2)    yes
C14 . C19 . 1.401(2)    yes
C15 . C16 . 1.395(2)    yes
C15 . H151 . 0.950    no
C16 . C17 . 1.392(2)    yes
C16 . H161 . 0.950    no
C17 . C18 . 1.388(3)    yes
C17 . C20 . 1.513(2)    yes
C18 . C19 . 1.396(2)    yes
C18 . H181 . 0.950    no
C19 . H191 . 0.950    no
C20 . H201 . 0.950    no
C20 . H202 . 0.950    no
C20 . H203 . 0.950    no
C21 . C22 . 1.4963(16)    yes
C22 . C23 . 1.3951(18)    yes
C22 . C27 . 1.3889(18)    yes
C23 . C24 . 1.388(2)    yes
C23 . H231 . 0.950    no
C24 . C25 . 1.380(3)    yes
C24 . H241 . 0.950    no
C25 . C26 . 1.383(2)    yes
C25 . H251 . 0.950    no
C26 . C27 . 1.3932(19)    yes
C26 . H261 . 0.950    no
C27 . H271 . 0.950    no
C28 . C29 . 1.5308(19)    yes
C28 . C30 . 1.5312(19)    yes
C28 . H281 . 0.950    no
C29 . H291 . 0.950    no
C29 . H292 . 0.950    no
C29 . H293 . 0.950    no
C30 . H301 . 0.950    no
C30 . H302 . 0.950    no
C30 . H303 . 0.950    no
C31 . C32 . 1.5223(19)    yes
C31 . C33 . 1.525(2)    yes
C31 . H311 . 0.950    no
C32 . H321 . 0.950    no
C32 . H322 . 0.950    no
C32 . H323 . 0.950    no
C33 . H331 . 0.950    no
C33 . H332 . 0.950    no
C33 . H333 . 0.950    no
C34 . C35 . 1.4216(19)    yes
C34 . C38 . 1.417(2)    yes
C34 . C39 . 1.4980(19)    yes
C35 . C36 . 1.4135(18)    yes
C35 . C40 . 1.4946(19)    yes
C36 . C37 . 1.4218(18)    yes
C36 . C41 . 1.4975(18)    yes
C37 . C38 . 1.4161(19)    yes
C37 . C42 . 1.4990(19)    yes
C38 . C43 . 1.5009(19)    yes
C39 . H391 . 0.950    no
C39 . H392 . 0.950    no
C39 . H393 . 0.950    no
C40 . H401 . 0.950    no
C40 . H402 . 0.950    no
C40 . H403 . 0.950    no
C41 . H411 . 0.950    no
C41 . H412 . 0.950    no
C41 . H413 . 0.950    no
C42 . H421 . 0.950    no
C42 . H422 . 0.950    no
C42 . H423 . 0.950    no
C43 . H431 . 0.950    no
C43 . H432 . 0.950    no
C43 . H433 . 0.950    no
loop_
 _geom_angle_atom_site_label_1
 _geom_angle_site_symmetry_1
 _geom_angle_atom_site_label_2
 _geom_angle_site_symmetry_2
 _geom_angle_atom_site_label_3
 _geom_angle_site_symmetry_3
 _geom_angle
 _geom_angle_publ_flag
O2 . Ti1 . O3 . 84.63(4)    yes
O2 . Ti1 . N2 . 134.28(4)    yes
O3 . Ti1 . N2 . 83.60(4)    yes
O2 . Ti1 . N3 . 90.54(4)    yes
O3 . Ti1 . N3 . 127.99(4)    yes
N2 . Ti1 . N3 . 63.73(4)    yes
O2 . Ti1 . C34 . 139.35(4)    yes
O3 . Ti1 . C34 . 116.20(4)    yes
N2 . Ti1 . C34 . 84.68(4)    yes
N3 . Ti1 . C34 . 100.59(5)    yes
O2 . Ti1 . C35 . 108.80(4)    yes
O3 . Ti1 . C35 . 143.24(4)    yes
N2 . Ti1 . C35 . 106.86(4)    yes
N3 . Ti1 . C35 . 86.97(4)    yes
C34 . Ti1 . C35 . 34.53(4)    yes
O2 . Ti1 . C36 . 81.91(4)    yes
O3 . Ti1 . C36 . 122.03(4)    yes
N2 . Ti1 . C36 . 140.17(4)    yes
N3 . Ti1 . C36 . 108.30(4)    yes
C34 . Ti1 . C36 . 57.45(4)    yes
O2 . Ti1 . C37 . 89.88(4)    yes
O3 . Ti1 . C37 . 89.37(4)    yes
N2 . Ti1 . C37 . 133.88(4)    yes
N3 . Ti1 . C37 . 142.49(4)    yes
C34 . Ti1 . C37 . 58.06(5)    yes
O2 . Ti1 . C38 . 124.20(4)    yes
O3 . Ti1 . C38 . 86.38(4)    yes
N2 . Ti1 . C38 . 98.92(4)    yes
N3 . Ti1 . C38 . 135.29(5)    yes
C34 . Ti1 . C38 . 34.82(5)    yes
C35 . Ti1 . C36 . 34.20(4)    yes
C35 . Ti1 . C37 . 57.63(4)    yes
C36 . Ti1 . C37 . 34.89(4)    yes
C35 . Ti1 . C38 . 57.53(5)    yes
C36 . Ti1 . C38 . 57.74(4)    yes
C37 . Ti1 . C38 . 35.03(5)    yes
N1 . O1 . C1 . 110.71(9)    yes
Ti1 . O2 . C5 . 113.21(7)    yes
Ti1 . O3 . C6 . 131.78(8)    yes
O1 . N1 . C5 . 109.93(10)    yes
Ti1 . N2 . C21 . 89.90(7)    yes
Ti1 . N2 . C28 . 133.35(8)    yes
C21 . N2 . C28 . 127.01(10)    yes
Ti1 . N3 . C21 . 88.89(7)    yes
Ti1 . N3 . C31 . 143.43(9)    yes
C21 . N3 . C31 . 121.39(10)    yes
C5 . N4 . C6 . 117.85(10)    yes
C5 . N4 . C7 . 116.86(10)    yes
C6 . N4 . C7 . 123.88(10)    yes
C6 . N5 . C14 . 120.60(11)    yes
O1 . C1 . C2 . 110.62(11)    yes
O1 . C1 . C3 . 109.54(11)    yes
C2 . C1 . C3 . 111.48(14)    yes
O1 . C1 . C4 . 102.32(11)    yes
C2 . C1 . C4 . 111.92(14)    yes
C3 . C1 . C4 . 110.59(13)    yes
C1 . C2 . H21 . 109.7    no
C1 . C2 . H22 . 109.5    no
H21 . C2 . H22 . 109.5    no
C1 . C2 . H23 . 109.2    no
H21 . C2 . H23 . 109.5    no
H22 . C2 . H23 . 109.5    no
C1 . C3 . H31 . 109.6    no
C1 . C3 . H32 . 109.5    no
H31 . C3 . H32 . 109.5    no
C1 . C3 . H33 . 109.3    no
H31 . C3 . H33 . 109.5    no
H32 . C3 . H33 . 109.5    no
C1 . C4 . H41 . 109.7    no
C1 . C4 . H42 . 109.3    no
H41 . C4 . H42 . 109.5    no
C1 . C4 . H43 . 109.4    no
H41 . C4 . H43 . 109.5    no
H42 . C4 . H43 . 109.5    no
N4 . C5 . O2 . 115.65(10)    yes
N4 . C5 . N1 . 124.34(11)    yes
O2 . C5 . N1 . 119.99(11)    yes
N4 . C6 . O3 . 113.47(10)    yes
N4 . C6 . N5 . 119.30(11)    yes
O3 . C6 . N5 . 127.22(11)    yes
N4 . C7 . C8 . 118.81(11)    yes
N4 . C7 . C12 . 121.39(12)    yes
C8 . C7 . C12 . 119.77(12)    yes
C7 . C8 . C9 . 120.05(12)    yes
C7 . C8 . H81 . 119.8    no
C9 . C8 . H81 . 120.2    no
C8 . C9 . C10 . 120.94(13)    yes
C8 . C9 . H91 . 119.6    no
C10 . C9 . H91 . 119.5    no
C9 . C10 . C11 . 118.29(12)    yes
C9 . C10 . C13 . 120.75(14)    yes
C11 . C10 . C13 . 120.93(14)    yes
C10 . C11 . C12 . 121.44(13)    yes
C10 . C11 . H111 . 119.2    no
C12 . C11 . H111 . 119.4    no
C11 . C12 . C7 . 119.46(13)    yes
C11 . C12 . H121 . 120.5    no
C7 . C12 . H121 . 120.0    no
C10 . C13 . H131 . 109.5    no
C10 . C13 . H132 . 109.6    no
H131 . C13 . H132 . 109.5    no
C10 . C13 . H133 . 109.3    no
H131 . C13 . H133 . 109.5    no
H132 . C13 . H133 . 109.5    no
N5 . C14 . C15 . 123.10(12)    yes
N5 . C14 . C19 . 118.68(13)    yes
C15 . C14 . C19 . 117.87(13)    yes
C14 . C15 . C16 . 120.78(14)    yes
C14 . C15 . H151 . 119.4    no
C16 . C15 . H151 . 119.8    no
C15 . C16 . C17 . 121.67(15)    yes
C15 . C16 . H161 . 119.3    no
C17 . C16 . H161 . 119.0    no
C16 . C17 . C18 . 117.40(13)    yes
C16 . C17 . C20 . 121.29(17)    yes
C18 . C17 . C20 . 121.29(16)    yes
C17 . C18 . C19 . 121.59(14)    yes
C17 . C18 . H181 . 119.1    no
C19 . C18 . H181 . 119.3    no
C14 . C19 . C18 . 120.68(15)    yes
C14 . C19 . H191 . 119.5    no
C18 . C19 . H191 . 119.8    no
C17 . C20 . H201 . 109.5    no
C17 . C20 . H202 . 109.2    no
H201 . C20 . H202 . 109.5    no
C17 . C20 . H203 . 109.7    no
H201 . C20 . H203 . 109.5    no
H202 . C20 . H203 . 109.5    no
N2 . C21 . N3 . 111.34(10)    yes
N2 . C21 . C22 . 125.53(11)    yes
N3 . C21 . C22 . 122.99(11)    yes
C21 . C22 . C23 . 119.44(12)    yes
C21 . C22 . C27 . 120.71(11)    yes
C23 . C22 . C27 . 119.84(12)    yes
C22 . C23 . C24 . 119.60(14)    yes
C22 . C23 . H231 . 120.0    no
C24 . C23 . H231 . 120.4    no
C23 . C24 . C25 . 120.51(14)    yes
C23 . C24 . H241 . 119.8    no
C25 . C24 . H241 . 119.7    no
C24 . C25 . C26 . 120.14(13)    yes
C24 . C25 . H251 . 120.0    no
C26 . C25 . H251 . 119.9    no
C25 . C26 . C27 . 119.97(14)    yes
C25 . C26 . H261 . 119.9    no
C27 . C26 . H261 . 120.1    no
C26 . C27 . C22 . 119.93(13)    yes
C26 . C27 . H271 . 120.2    no
C22 . C27 . H271 . 119.9    no
N2 . C28 . C29 . 110.77(11)    yes
N2 . C28 . C30 . 115.31(11)    yes
C29 . C28 . C30 . 111.43(11)    yes
N2 . C28 . H281 . 106.2    no
C29 . C28 . H281 . 106.2    no
C30 . C28 . H281 . 106.2    no
C28 . C29 . H291 . 109.8    no
C28 . C29 . H292 . 109.2    no
H291 . C29 . H292 . 109.5    no
C28 . C29 . H293 . 109.4    no
H291 . C29 . H293 . 109.5    no
H292 . C29 . H293 . 109.5    no
C28 . C30 . H301 . 109.7    no
C28 . C30 . H302 . 109.2    no
H301 . C30 . H302 . 109.5    no
C28 . C30 . H303 . 109.5    no
H301 . C30 . H303 . 109.5    no
H302 . C30 . H303 . 109.5    no
N3 . C31 . C32 . 110.94(11)    yes
N3 . C31 . C33 . 109.77(11)    yes
C32 . C31 . C33 . 110.98(12)    yes
N3 . C31 . H311 . 108.3    no
C32 . C31 . H311 . 108.2    no
C33 . C31 . H311 . 108.5    no
C31 . C32 . H321 . 109.9    no
C31 . C32 . H322 . 109.2    no
H321 . C32 . H322 . 109.5    no
C31 . C32 . H323 . 109.2    no
H321 . C32 . H323 . 109.5    no
H322 . C32 . H323 . 109.5    no
C31 . C33 . H331 . 109.7    no
C31 . C33 . H332 . 109.2    no
H331 . C33 . H332 . 109.5    no
C31 . C33 . H333 . 109.5    no
H331 . C33 . H333 . 109.5    no
H332 . C33 . H333 . 109.5    no
Ti1 . C34 . C35 . 74.14(7)    yes
Ti1 . C34 . C38 . 71.96(7)    yes
C35 . C34 . C38 . 108.03(11)    yes
Ti1 . C34 . C39 . 124.11(9)    yes
C35 . C34 . C39 . 124.97(14)    yes
C38 . C34 . C39 . 126.76(14)    yes
Ti1 . C35 . C34 . 71.33(7)    yes
Ti1 . C35 . C36 . 72.20(7)    yes
C34 . C35 . C36 . 107.94(11)    yes
Ti1 . C35 . C40 . 128.47(9)    yes
C34 . C35 . C40 . 124.66(13)    yes
C36 . C35 . C40 . 126.89(13)    yes
Ti1 . C36 . C35 . 73.60(7)    yes
Ti1 . C36 . C37 . 70.69(7)    yes
C35 . C36 . C37 . 108.04(11)    yes
Ti1 . C36 . C41 . 123.09(9)    yes
C35 . C36 . C41 . 126.67(13)    yes
C37 . C36 . C41 . 125.25(12)    yes
Ti1 . C37 . C36 . 74.42(7)    yes
Ti1 . C37 . C38 . 73.02(7)    yes
C36 . C37 . C38 . 107.98(11)    yes
Ti1 . C37 . C42 . 119.77(9)    yes
C36 . C37 . C42 . 124.91(13)    yes
C38 . C37 . C42 . 127.09(13)    yes
Ti1 . C38 . C34 . 73.23(7)    yes
Ti1 . C38 . C37 . 71.96(7)    yes
C34 . C38 . C37 . 107.98(11)    yes
Ti1 . C38 . C43 . 122.15(9)    yes
C34 . C38 . C43 . 126.15(14)    yes
C37 . C38 . C43 . 125.84(14)    yes
C34 . C39 . H391 . 109.5    no
C34 . C39 . H392 . 109.3    no
H391 . C39 . H392 . 109.5    no
C34 . C39 . H393 . 109.6    no
H391 . C39 . H393 . 109.5    no
H392 . C39 . H393 . 109.5    no
C35 . C40 . H401 . 109.5    no
C35 . C40 . H402 . 109.3    no
H401 . C40 . H402 . 109.5    no
C35 . C40 . H403 . 109.7    no
H401 . C40 . H403 . 109.5    no
H402 . C40 . H403 . 109.5    no
C36 . C41 . H411 . 109.5    no
C36 . C41 . H412 . 109.7    no
H411 . C41 . H412 . 109.5    no
C36 . C41 . H413 . 109.4    no
H411 . C41 . H413 . 109.4    no
H412 . C41 . H413 . 109.4    no
C37 . C42 . H421 . 109.3    no
C37 . C42 . H422 . 109.5    no
H421 . C42 . H422 . 109.5    no
C37 . C42 . H423 . 109.6    no
H421 . C42 . H423 . 109.5    no
H422 . C42 . H423 . 109.5    no
C38 . C43 . H431 . 109.3    no
C38 . C43 . H432 . 109.4    no
H431 . C43 . H432 . 109.5    no
C38 . C43 . H433 . 109.6    no
H431 . C43 . H433 . 109.5    no
H432 . C43 . H433 . 109.5    no

#===end

data_compound_23

# local code LG6

_chemical_name_systematic        
;
[Cp*Ti{PhC(NiPr)2}(mu-O)]2
;

_publ_section_exptl_refinement 
; 

The C-bound H atoms were all positioned geometrically. 
then initially refined with soft restraints on the 
bond lengths and angles to regularise their geometry
after which the positions were refined with riding constraints 
; 

_cell_length_a                    32.088(6)
_cell_length_b                    10.816(2)
_cell_length_c                    26.575(5)
_cell_angle_alpha                 90
_cell_angle_beta                  110.75(3)
_cell_angle_gamma                 90
_cell_volume                      8625(3)
 
_symmetry_cell_setting            'monoclinic' 
_symmetry_space_group_name_H-M    'P 21/c ' 
_symmetry_space_group_name_Hall   '-P 2ybc' 
loop_
 _symmetry_equiv_pos_as_xyz
 'x,y,z'
 '-x,-y,-z'
 'x,-y+1/2,z+1/2'
 '-x,y+1/2,-z+1/2'

loop_
_atom_type_symbol
_atom_type_scat_dispersion_real
_atom_type_scat_dispersion_imag
_atom_type_scat_Cromer_Mann_a1
_atom_type_scat_Cromer_Mann_b1
_atom_type_scat_Cromer_Mann_a2
_atom_type_scat_Cromer_Mann_b2
_atom_type_scat_Cromer_Mann_a3
_atom_type_scat_Cromer_Mann_b3
_atom_type_scat_Cromer_Mann_a4
_atom_type_scat_Cromer_Mann_b4
_atom_type_scat_Cromer_Mann_c
_atom_type_scat_source  
 C       0.0033   0.0016   2.3100  20.8439   1.0200  10.2075   1.5886   0.5687
   0.8650  51.6512   0.2156 'International Tables Vol C 4.2.6.8 and 6.1.1.4'
 H       0.0000   0.0000   0.4930  10.5109   0.3229  26.1257   0.1402   3.1424
   0.0408  57.7998   0.0030 'International Tables Vol C 4.2.6.8 and 6.1.1.4'
 N       0.0061   0.0033  12.2126   0.0057   3.1322   9.8933   2.0125  28.9975
   1.1663   0.5826 -11.5290 'International Tables Vol C 4.2.6.8 and 6.1.1.4'
 O       0.0106   0.0060   3.0485  13.2771   2.2868   5.7011   1.5463   0.3239
   0.8670  32.9089   0.2508 'International Tables Vol C 4.2.6.8 and 6.1.1.4'
 Ti      0.2776   0.4457   9.7595   7.8508   7.3558   0.5000   1.6991  35.6338
   1.9021 116.1050   1.2807 'International Tables Vol C 4.2.6.8 and 6.1.1.4'
 
 
_cell_formula_units_Z                    8

_chemical_formula_sum             'C46 H68 N4 O2 Ti2'
_chemical_formula_moiety          'C46 H68 N4 O2 Ti2'
_chemical_compound_source                ?
_chemical_formula_weight            804.87
 
 
_cell_measurement_reflns_used        20475
_cell_measurement_theta_min              5
_cell_measurement_theta_max             27
_cell_measurement_temperature          150
 
_exptl_crystal_description        'block' 
_exptl_crystal_colour             'orange' 
_exptl_crystal_size_min           0.200 
_exptl_crystal_size_mid           0.200 
_exptl_crystal_size_max           0.200 
 
_exptl_crystal_density_diffrn     1.240 
_exptl_crystal_density_meas       ? 
_exptl_crystal_density_method     'not measured' 
_exptl_crystal_F_000              3456 
_exptl_absorpt_coefficient_mu     0.411 

_exptl_absorpt_correction_type    multi-scan 
_exptl_absorpt_process_details    'DENZO/SCALEPACK (Otwinowski & Minor, 1997)' 
_exptl_absorpt_correction_T_min   0.92 
_exptl_absorpt_correction_T_max   0.92 
_diffrn_measurement_device_type   'Nonius KappaCCD' 
_diffrn_measurement_device        'Area' 
_diffrn_radiation_monochromator   'graphite' 
_diffrn_radiation_type            'Mo K\a'
_diffrn_radiation_wavelength           0.71073
_diffrn_measurement_method        \w/2\q 
 
 
_computing_data_collection        'COLLECT (Nonius, 2001).' 
_computing_cell_refinement        'DENZO/SCALEPACK (Otwinowski & Minor, 1997)' 
_computing_data_reduction         'DENZO/SCALEPACK (Otwinowski & Minor, 1997)' 
_computing_structure_solution     'SIR92 (Altomare et al., 1994)' 
_computing_structure_refinement   'CRYSTALS (Betteridge et al., 2003)' 
_computing_publication_material   'CRYSTALS (Betteridge et al., 2003)' 
_computing_molecular_graphics     'CAMERON (Watkin et al., 1996)' 
 
_diffrn_standards_interval_time   . 
_diffrn_standards_interval_count  . 
_diffrn_standards_number          0 
_diffrn_standards_decay_%         ? 
 
_diffrn_ambient_temperature        150
_diffrn_reflns_number             37605 
_reflns_number_total              19606 
_diffrn_reflns_av_R_equivalents   0.034 
 
 
_diffrn_reflns_theta_min          5.104 
_diffrn_reflns_theta_max          27.480 
_diffrn_measured_fraction_theta_max 0.992 
 
_diffrn_reflns_theta_full         26.931 
_diffrn_measured_fraction_theta_full 0.992 
 
 
_diffrn_reflns_limit_h_min        -41 
_diffrn_reflns_limit_h_max        41 
_diffrn_reflns_limit_k_min        -14 
_diffrn_reflns_limit_k_max        14 
_diffrn_reflns_limit_l_min        -34 
_diffrn_reflns_limit_l_max        34 
_reflns_limit_h_min               -41 
_reflns_limit_h_max               38 
_reflns_limit_k_min               0 
_reflns_limit_k_max               14 
_reflns_limit_l_min               0 
_reflns_limit_l_max               34 
 
_oxford_diffrn_Wilson_B_factor    1.58 
_oxford_diffrn_Wilson_scale       29.38 
 
_atom_sites_solution_primary      Direct 
_atom_sites_solution_secondary  difmap
_atom_sites_solution_hydrogens    geom
 
_refine_diff_density_min          -0.62 
_refine_diff_density_max          0.91 
 
 
# The current dictionary definitions do not cover the 
# situation where the reflections used for refinement were 
# selected by a user-defined sigma threshold 
 
 
# The values actually used during refinement 
_oxford_reflns_threshold_expression_ref     I>3.0\s(I)
_refine_ls_number_reflns          12385 
_refine_ls_number_restraints      0 
_refine_ls_number_parameters      973 
_oxford_refine_ls_R_factor_ref    0.0468 
_refine_ls_wR_factor_ref          0.0564 
_refine_ls_goodness_of_fit_ref    1.0811 
_refine_ls_shift/su_max           0.0007140 
_refine_ls_shift/su_mean          0.0000258 
 
 
# The values computed from all data 
_oxford_reflns_number_all         19606 
_refine_ls_R_factor_all           0.0837 
_refine_ls_wR_factor_all          0.0867 
 
# The values computed with a 2 sigma cutoff - a la SHELX 
_reflns_threshold_expression      I>2.0\s(I)
_reflns_number_gt                 13687 
_refine_ls_R_factor_gt            0.0524 
_refine_ls_wR_factor_gt           0.0599 
 
_chemical_absolute_configuration  '.' 
 
 
_refine_ls_structure_factor_coef  F 
_refine_ls_matrix_type            full
_refine_ls_hydrogen_treatment     none 
_refine_ls_weighting_scheme       calc 
_refine_ls_weighting_details 
;
 Method, part 1, Chebychev polynomial, (Watkin, 1994, Prince, 1982) 
 [weight] = 1.0/[A~0~*T~0~(x)+A~1~*T~1~(x) ... +A~n-1~]*T~n-1~(x)] 
 where A~i~ are the Chebychev coefficients listed below and x= Fcalc/Fmax 
 Method = Robust Weighting (Prince, 1982) 
 W = [weight] * [1-(deltaF/6*sigmaF)^2^]^2^ 
 A~i~ are: 
 0.961 0.706 0.577 
;
_publ_section_references 
; 
Nonius (2001). COLLECT. Nonius BV, Delft, The Netherlands. 
 
Otwinowski, Z. & Minor, W. (1997). Methods in Enzymology, Vol. 276, 
edited by C. W. Carter Jr & R. M. Sweet, pp. 307--326. 
New York: Academic Press. 
 
Betteridge, P.W., Carruthers, J.R., Cooper, R.I., 
Prout, K. & Watkin, D.J. (2003). J. Appl. Cryst. 36, 1487. 
 
Watkin, D.J., Prout, C.K. & Pearce, L.J. (1996). CAMERON, Chemical 
Crystallography Laboratory, Oxford, UK. 
 
Altomare, A., Cascarano, G., Giacovazzo, C., Guagliardi, A., Burla, M.C., 
Polidori, G. & Camalli, M. (1994). J. Appl. Cryst. 27, 435. 
 
Watkin D.J. (1994). 
Acta Cryst, A50, 411-437. 
 
Prince, E. 
Mathematical Techniques in Crystallography 
and Materials Science 
Springer-Verlag, New York, 1982. 
; 

# Uequiv = arithmetic mean of Ui i.e. Ueqiv = (U1+U2+U3)/3


loop_
_atom_site_label
_atom_site_type_symbol
_atom_site_fract_x
_atom_site_fract_y
_atom_site_fract_z
_atom_site_U_iso_or_equiv
_atom_site_occupancy
_atom_site_adp_type
_atom_site_refinement_flags_posn
_atom_site_refinement_flags_adp
_atom_site_refinement_flags_occupancy
_atom_site_disorder_assembly
_atom_site_disorder_group
_atom_site_attached_hydrogens
Ti1 Ti 0.223368(14) 0.45988(4) -0.052085(16) 0.0201 1.0000 Uani . . . . . . 
Ti2 Ti 0.276439(14) 0.57252(4) 0.045578(17) 0.0208 1.0000 Uani . . . . . . 
Ti3 Ti 0.512489(12) 0.97415(3) 0.055403(14) 0.0137 1.0000 Uani . . . . . . 
Ti4 Ti 0.011390(13) 0.97333(3) 0.055176(15) 0.0148 1.0000 Uani . . . . . . 
N1 N 0.25809(6) 0.36834(18) -0.09967(8) 0.0216 1.0000 Uani . . . . . . 
N2 N 0.22385(7) 0.54730(18) -0.12642(8) 0.0240 1.0000 Uani . . . . . . 
N3 N 0.27908(7) 0.47368(19) 0.11966(8) 0.0247 1.0000 Uani . . . . . . 
N4 N 0.24201(7) 0.64924(19) 0.09539(8) 0.0238 1.0000 Uani . . . . . . 
N101 N 0.55927(6) 1.10566(16) 0.10884(8) 0.0199 1.0000 Uani . . . . . . 
N102 N 0.48848(6) 1.10538(17) 0.10250(7) 0.0188 1.0000 Uani . . . . . . 
N201 N 0.05919(6) 1.10133(17) 0.10975(8) 0.0201 1.0000 Uani . . . . . . 
N202 N -0.01186(6) 1.10605(17) 0.10172(8) 0.0211 1.0000 Uani . . . . . . 
O1 O 0.22968(5) 0.61255(15) -0.01739(7) 0.0241 1.0000 Uani . . . . . . 
O2 O 0.27022(5) 0.42064(16) 0.01075(6) 0.0243 1.0000 Uani . . . . . . 
O101 O 0.46122(5) 1.00215(14) -0.00383(6) 0.0189 1.0000 Uani . . . . . . 
O201 O -0.03889(5) 1.00466(15) -0.00476(6) 0.0200 1.0000 Uani . . . . . . 
C1 C 0.25122(8) 0.4623(2) -0.13358(9) 0.0225 1.0000 Uani . . . . . . 
C2 C 0.27238(8) 0.4703(2) -0.17597(10) 0.0254 1.0000 Uani . . . . . . 
C3 C 0.25165(10) 0.4115(3) -0.22523(11) 0.0396 1.0000 Uani . . . . . . 
C4 C 0.27058(11) 0.4133(3) -0.26495(12) 0.0475 1.0000 Uani . . . . . . 
C5 C 0.31070(11) 0.4729(3) -0.25566(12) 0.0419 1.0000 Uani . . . . . . 
C6 C 0.33151(11) 0.5305(3) -0.20744(13) 0.0401 1.0000 Uani . . . . . . 
C7 C 0.31256(10) 0.5301(3) -0.16764(11) 0.0340 1.0000 Uani . . . . . . 
C8 C 0.29088(8) 0.2716(2) -0.09788(10) 0.0266 1.0000 Uani . . . . . . 
C9 C 0.31242(9) 0.2218(3) -0.04138(11) 0.0350 1.0000 Uani . . . . . . 
C10 C 0.27158(11) 0.1674(3) -0.13717(13) 0.0466 1.0000 Uani . . . . . . 
C11 C 0.21596(9) 0.6661(2) -0.15572(10) 0.0285 1.0000 Uani . . . . . . 
C12 C 0.18743(12) 0.6550(3) -0.21549(12) 0.0478 1.0000 Uani . . . . . . 
C13 C 0.19524(11) 0.7593(3) -0.12860(13) 0.0420 1.0000 Uani . . . . . . 
C14 C 0.14958(10) 0.4552(3) -0.04916(15) 0.0406 1.0000 Uani . . . . . . 
C15 C 0.17247(9) 0.3522(3) -0.02115(10) 0.0322 1.0000 Uani . . . . . . 
C16 C 0.17943(8) 0.2703(2) -0.05912(12) 0.0322 1.0000 Uani . . . . . . 
C17 C 0.16034(9) 0.3275(3) -0.10988(10) 0.0333 1.0000 Uani . . . . . . 
C18 C 0.14196(9) 0.4402(3) -0.10303(14) 0.0421 1.0000 Uani . . . . . . 
C19 C 0.13306(14) 0.5578(4) -0.0223(2) 0.0826 1.0000 Uani . . . . . . 
C20 C 0.18329(13) 0.3238(5) 0.03719(13) 0.0712 1.0000 Uani . . . . . . 
C21 C 0.19836(12) 0.1424(3) -0.0477(2) 0.0684 1.0000 Uani . . . . . . 
C22 C 0.15696(12) 0.2751(5) -0.16364(15) 0.0729 1.0000 Uani . . . . . . 
C23 C 0.11202(12) 0.5208(5) -0.1471(2) 0.0893 1.0000 Uani . . . . . . 
C24 C 0.25007(8) 0.5514(2) 0.12760(9) 0.0230 1.0000 Uani . . . . . . 
C25 C 0.22784(9) 0.5304(2) 0.16808(10) 0.0268 1.0000 Uani . . . . . . 
C26 C 0.25097(11) 0.5558(3) 0.22209(11) 0.0386 1.0000 Uani . . . . . . 
C27 C 0.23032(13) 0.5397(3) 0.25962(13) 0.0502 1.0000 Uani . . . . . . 
C28 C 0.18700(14) 0.4989(3) 0.24376(15) 0.0520 1.0000 Uani . . . . . . 
C29 C 0.16383(12) 0.4738(3) 0.19092(16) 0.0487 1.0000 Uani . . . . . . 
C30 C 0.18387(10) 0.4900(3) 0.15251(13) 0.0376 1.0000 Uani . . . . . . 
C31 C 0.28935(9) 0.3538(2) 0.14701(11) 0.0303 1.0000 Uani . . . . . . 
C32 C 0.32887(13) 0.3599(3) 0.19961(14) 0.0568 1.0000 Uani . . . . . . 
C33 C 0.29890(11) 0.2560(3) 0.11137(14) 0.0446 1.0000 Uani . . . . . . 
C34 C 0.20886(8) 0.7439(2) 0.09505(10) 0.0268 1.0000 Uani . . . . . . 
C35 C 0.22180(10) 0.8201(3) 0.14646(11) 0.0374 1.0000 Uani . . . . . . 
C36 C 0.19983(10) 0.8288(3) 0.04691(11) 0.0371 1.0000 Uani . . . . . . 
C37 C 0.34951(9) 0.6546(3) 0.10828(10) 0.0357 1.0000 Uani . . . . . . 
C38 C 0.32642(10) 0.7598(3) 0.08191(13) 0.0377 1.0000 Uani . . . . . . 
C39 C 0.31719(9) 0.7488(3) 0.02765(12) 0.0340 1.0000 Uani . . . . . . 
C40 C 0.33487(8) 0.6353(2) 0.01838(10) 0.0250 1.0000 Uani . . . . . . 
C41 C 0.35633(8) 0.5763(3) 0.06854(11) 0.0293 1.0000 Uani . . . . . . 
C42 C 0.36866(13) 0.6394(4) 0.16826(12) 0.0614 1.0000 Uani . . . . . . 
C43 C 0.31992(13) 0.8746(3) 0.11099(18) 0.0606 1.0000 Uani . . . . . . 
C44 C 0.29481(12) 0.8453(3) -0.01437(16) 0.0529 1.0000 Uani . . . . . . 
C45 C 0.33581(10) 0.5923(3) -0.03507(11) 0.0366 1.0000 Uani . . . . . . 
C46 C 0.38352(11) 0.4615(3) 0.07784(16) 0.0489 1.0000 Uani . . . . . . 
C101 C 0.52711(8) 1.1646(2) 0.11990(8) 0.0179 1.0000 Uani . . . . . . 
C102 C 0.53401(8) 1.2872(2) 0.14860(9) 0.0212 1.0000 Uani . . . . . . 
C103 C 0.54836(10) 1.2914(2) 0.20466(10) 0.0309 1.0000 Uani . . . . . . 
C104 C 0.55490(11) 1.4037(3) 0.23141(11) 0.0386 1.0000 Uani . . . . . . 
C105 C 0.54699(11) 1.5130(2) 0.20263(11) 0.0355 1.0000 Uani . . . . . . 
C106 C 0.53250(10) 1.5105(2) 0.14714(11) 0.0342 1.0000 Uani . . . . . . 
C107 C 0.52625(9) 1.3980(2) 0.12017(10) 0.0261 1.0000 Uani . . . . . . 
C108 C 0.60382(8) 1.1603(2) 0.12160(10) 0.0240 1.0000 Uani . . . . . . 
C109 C 0.63362(9) 1.1422(3) 0.18065(11) 0.0349 1.0000 Uani . . . . . . 
C110 C 0.62697(8) 1.1074(2) 0.08564(11) 0.0299 1.0000 Uani . . . . . . 
C111 C 0.44771(8) 1.1612(2) 0.10620(10) 0.0239 1.0000 Uani . . . . . . 
C112 C 0.44534(10) 1.1524(3) 0.16250(11) 0.0362 1.0000 Uani . . . . . . 
C113 C 0.40666(8) 1.1040(3) 0.06538(11) 0.0300 1.0000 Uani . . . . . . 
C114 C 0.49126(8) 0.7623(2) 0.05511(9) 0.0202 1.0000 Uani . . . . . . 
C115 C 0.48749(8) 0.81039(19) 0.10272(9) 0.0200 1.0000 Uani . . . . . . 
C116 C 0.53085(8) 0.8430(2) 0.13797(9) 0.0191 1.0000 Uani . . . . . . 
C117 C 0.56139(8) 0.8104(2) 0.11250(9) 0.0199 1.0000 Uani . . . . . . 
C118 C 0.53722(8) 0.76299(19) 0.06128(9) 0.0192 1.0000 Uani . . . . . . 
C119 C 0.45499(10) 0.7023(2) 0.00970(11) 0.0335 1.0000 Uani . . . . . . 
C120 C 0.44643(9) 0.8075(3) 0.11714(13) 0.0352 1.0000 Uani . . . . . . 
C121 C 0.54264(9) 0.8931(2) 0.19387(9) 0.0291 1.0000 Uani . . . . . . 
C122 C 0.61130(9) 0.8079(2) 0.13907(12) 0.0328 1.0000 Uani . . . . . . 
C123 C 0.55650(10) 0.7055(2) 0.02294(11) 0.0313 1.0000 Uani . . . . . . 
C201 C 0.02733(8) 1.1630(2) 0.12012(8) 0.0195 1.0000 Uani . . . . . . 
C202 C 0.03434(8) 1.2858(2) 0.14860(9) 0.0219 1.0000 Uani . . . . . . 
C203 C 0.04967(10) 1.2915(2) 0.20452(10) 0.0319 1.0000 Uani . . . . . . 
C204 C 0.05563(11) 1.4043(3) 0.23106(11) 0.0369 1.0000 Uani . . . . . . 
C205 C 0.04594(10) 1.5129(2) 0.20162(11) 0.0358 1.0000 Uani . . . . . . 
C206 C 0.03056(10) 1.5090(2) 0.14607(11) 0.0347 1.0000 Uani . . . . . . 
C207 C 0.02500(9) 1.3956(2) 0.11978(10) 0.0270 1.0000 Uani . . . . . . 
C208 C 0.10417(8) 1.1533(2) 0.12188(10) 0.0242 1.0000 Uani . . . . . . 
C209 C 0.13398(9) 1.1409(3) 0.18123(11) 0.0364 1.0000 Uani . . . . . . 
C210 C 0.12675(8) 1.0925(3) 0.08695(11) 0.0314 1.0000 Uani . . . . . . 
C211 C -0.05199(8) 1.1623(2) 0.10682(10) 0.0244 1.0000 Uani . . . . . . 
C212 C -0.05366(10) 1.1469(3) 0.16324(11) 0.0364 1.0000 Uani . . . . . . 
C213 C -0.09384(8) 1.1094(3) 0.06489(11) 0.0318 1.0000 Uani . . . . . . 
C214 C 0.02616(8) 0.8402(2) 0.13700(9) 0.0224 1.0000 Uani . . . . . . 
C215 C 0.05775(8) 0.8079(2) 0.11335(9) 0.0203 1.0000 Uani . . . . . . 
C216 C 0.03454(8) 0.7616(2) 0.06141(9) 0.0207 1.0000 Uani . . . . . . 
C217 C -0.01172(8) 0.7626(2) 0.05325(9) 0.0214 1.0000 Uani . . . . . . 
C218 C -0.01681(8) 0.8092(2) 0.10018(10) 0.0227 1.0000 Uani . . . . . . 
C219 C 0.03692(11) 0.8890(2) 0.19305(10) 0.0344 1.0000 Uani . . . . . . 
C220 C 0.10716(9) 0.8039(3) 0.14191(12) 0.0350 1.0000 Uani . . . . . . 
C221 C 0.05483(10) 0.7050(2) 0.02414(11) 0.0327 1.0000 Uani . . . . . . 
C222 C -0.04731(10) 0.7042(2) 0.00649(11) 0.0350 1.0000 Uani . . . . . . 
C223 C -0.05916(10) 0.8054(3) 0.11211(14) 0.0410 1.0000 Uani . . . . . . 
H31 H 0.2240 0.3703 -0.2314 0.0503 1.0000 Uiso R . . . . . 
H41 H 0.2555 0.3741 -0.2989 0.0594 1.0000 Uiso R . . . . . 
H51 H 0.3237 0.4741 -0.2830 0.0546 1.0000 Uiso R . . . . . 
H61 H 0.3596 0.5705 -0.2009 0.0509 1.0000 Uiso R . . . . . 
H71 H 0.3272 0.5708 -0.1341 0.0441 1.0000 Uiso R . . . . . 
H81 H 0.3152 0.3104 -0.1085 0.0348 1.0000 Uiso R . . . . . 
H91 H 0.3340 0.1579 -0.0419 0.0572 1.0000 Uiso R . . . . . 
H92 H 0.3267 0.2877 -0.0163 0.0574 1.0000 Uiso R . . . . . 
H93 H 0.2901 0.1826 -0.0300 0.0569 1.0000 Uiso R . . . . . 
H101 H 0.2498 0.1241 -0.1251 0.0776 1.0000 Uiso R . . . . . 
H102 H 0.2571 0.1990 -0.1736 0.0766 1.0000 Uiso R . . . . . 
H103 H 0.2954 0.1108 -0.1361 0.0767 1.0000 Uiso R . . . . . 
H111 H 0.2458 0.7006 -0.1541 0.0395 1.0000 Uiso R . . . . . 
H121 H 0.1592 0.6202 -0.2152 0.0771 1.0000 Uiso R . . . . . 
H122 H 0.2016 0.5999 -0.2340 0.0775 1.0000 Uiso R . . . . . 
H123 H 0.1821 0.7372 -0.2323 0.0769 1.0000 Uiso R . . . . . 
H131 H 0.1967 0.8422 -0.1429 0.0660 1.0000 Uiso R . . . . . 
H132 H 0.2114 0.7577 -0.0907 0.0658 1.0000 Uiso R . . . . . 
H133 H 0.1648 0.7358 -0.1352 0.0661 1.0000 Uiso R . . . . . 
H191 H 0.1254 0.6259 -0.0492 0.1322 1.0000 Uiso R . . . . . 
H192 H 0.1563 0.5827 0.0120 0.1327 1.0000 Uiso R . . . . . 
H193 H 0.1061 0.5315 -0.0165 0.1322 1.0000 Uiso R . . . . . 
H201 H 0.1550 0.3263 0.0442 0.1177 1.0000 Uiso R . . . . . 
H202 H 0.2035 0.3863 0.0588 0.1182 1.0000 Uiso R . . . . . 
H203 H 0.1976 0.2413 0.0449 0.1192 1.0000 Uiso R . . . . . 
H211 H 0.2030 0.1110 -0.0815 0.1108 1.0000 Uiso R . . . . . 
H212 H 0.2260 0.1424 -0.0158 0.1105 1.0000 Uiso R . . . . . 
H213 H 0.1767 0.0901 -0.0397 0.1103 1.0000 Uiso R . . . . . 
H221 H 0.1325 0.3206 -0.1903 0.1201 1.0000 Uiso R . . . . . 
H222 H 0.1848 0.2857 -0.1700 0.1198 1.0000 Uiso R . . . . . 
H223 H 0.1494 0.1874 -0.1637 0.1199 1.0000 Uiso R . . . . . 
H231 H 0.1201 0.5074 -0.1792 0.1360 1.0000 Uiso R . . . . . 
H232 H 0.1160 0.6077 -0.1357 0.1368 1.0000 Uiso R . . . . . 
H233 H 0.0812 0.4954 -0.1547 0.1362 1.0000 Uiso R . . . . . 
H261 H 0.2813 0.5856 0.2329 0.0493 1.0000 Uiso R . . . . . 
H271 H 0.2465 0.5575 0.2965 0.0633 1.0000 Uiso R . . . . . 
H281 H 0.1731 0.4876 0.2694 0.0644 1.0000 Uiso R . . . . . 
H291 H 0.1339 0.4443 0.1802 0.0597 1.0000 Uiso R . . . . . 
H301 H 0.1672 0.4733 0.1151 0.0489 1.0000 Uiso R . . . . . 
H311 H 0.2628 0.3255 0.1550 0.0392 1.0000 Uiso R . . . . . 
H321 H 0.3321 0.2791 0.2167 0.0898 1.0000 Uiso R . . . . . 
H322 H 0.3557 0.3811 0.1919 0.0907 1.0000 Uiso R . . . . . 
H323 H 0.3227 0.4214 0.2231 0.0901 1.0000 Uiso R . . . . . 
H331 H 0.2735 0.2492 0.0775 0.0716 1.0000 Uiso R . . . . . 
H332 H 0.3252 0.2790 0.1046 0.0713 1.0000 Uiso R . . . . . 
H333 H 0.3042 0.1771 0.1308 0.0704 1.0000 Uiso R . . . . . 
H341 H 0.1802 0.7006 0.0910 0.0352 1.0000 Uiso R . . . . . 
H351 H 0.2230 0.7703 0.1773 0.0636 1.0000 Uiso R . . . . . 
H352 H 0.2507 0.8554 0.1524 0.0637 1.0000 Uiso R . . . . . 
H353 H 0.2006 0.8869 0.1414 0.0627 1.0000 Uiso R . . . . . 
H361 H 0.1732 0.8797 0.0427 0.0589 1.0000 Uiso R . . . . . 
H362 H 0.2261 0.8816 0.0518 0.0598 1.0000 Uiso R . . . . . 
H363 H 0.1942 0.7790 0.0148 0.0583 1.0000 Uiso R . . . . . 
H421 H 0.3845 0.5565 0.1753 0.1012 1.0000 Uiso R . . . . . 
H422 H 0.3886 0.7091 0.1837 0.1013 1.0000 Uiso R . . . . . 
H423 H 0.3444 0.6406 0.1823 0.1011 1.0000 Uiso R . . . . . 
H431 H 0.3123 0.8473 0.1422 0.0994 1.0000 Uiso R . . . . . 
H432 H 0.3481 0.9220 0.1249 0.0995 1.0000 Uiso R . . . . . 
H433 H 0.2954 0.9242 0.0852 0.1000 1.0000 Uiso R . . . . . 
H441 H 0.2864 0.8054 -0.0507 0.0828 1.0000 Uiso R . . . . . 
H442 H 0.3154 0.9148 -0.0104 0.0823 1.0000 Uiso R . . . . . 
H443 H 0.2682 0.8756 -0.0079 0.0821 1.0000 Uiso R . . . . . 
H451 H 0.3347 0.5009 -0.0364 0.0584 1.0000 Uiso R . . . . . 
H452 H 0.3630 0.6244 -0.0398 0.0580 1.0000 Uiso R . . . . . 
H453 H 0.3091 0.6285 -0.0629 0.0584 1.0000 Uiso R . . . . . 
H461 H 0.3696 0.4051 0.0467 0.0773 1.0000 Uiso R . . . . . 
H462 H 0.4140 0.4810 0.0804 0.0778 1.0000 Uiso R . . . . . 
H463 H 0.3845 0.4240 0.1124 0.0776 1.0000 Uiso R . . . . . 
H1031 H 0.5537 1.2161 0.2245 0.0385 1.0000 Uiso R . . . . . 
H1041 H 0.5648 1.4052 0.2694 0.0470 1.0000 Uiso R . . . . . 
H1051 H 0.5513 1.5891 0.2213 0.0445 1.0000 Uiso R . . . . . 
H1061 H 0.5270 1.5848 0.1274 0.0431 1.0000 Uiso R . . . . . 
H1071 H 0.5168 1.3967 0.0824 0.0335 1.0000 Uiso R . . . . . 
H1081 H 0.6002 1.2513 0.1150 0.0315 1.0000 Uiso R . . . . . 
H1091 H 0.6624 1.1800 0.1869 0.0578 1.0000 Uiso R . . . . . 
H1092 H 0.6204 1.1799 0.2048 0.0580 1.0000 Uiso R . . . . . 
H1093 H 0.6373 1.0546 0.1885 0.0581 1.0000 Uiso R . . . . . 
H1101 H 0.6300 1.0187 0.0907 0.0490 1.0000 Uiso R . . . . . 
H1102 H 0.6100 1.1242 0.0483 0.0487 1.0000 Uiso R . . . . . 
H1103 H 0.6565 1.1442 0.0950 0.0490 1.0000 Uiso R . . . . . 
H1111 H 0.4485 1.2508 0.0978 0.0307 1.0000 Uiso R . . . . . 
H1121 H 0.4476 1.0660 0.1727 0.0583 1.0000 Uiso R . . . . . 
H1122 H 0.4696 1.1978 0.1885 0.0581 1.0000 Uiso R . . . . . 
H1123 H 0.4169 1.1850 0.1611 0.0581 1.0000 Uiso R . . . . . 
H1131 H 0.3802 1.1472 0.0658 0.0477 1.0000 Uiso R . . . . . 
H1132 H 0.4078 1.1068 0.0294 0.0478 1.0000 Uiso R . . . . . 
H1133 H 0.4041 1.0178 0.0748 0.0484 1.0000 Uiso R . . . . . 
H1191 H 0.4542 0.7360 -0.0245 0.0519 1.0000 Uiso R . . . . . 
H1192 H 0.4266 0.7176 0.0134 0.0522 1.0000 Uiso R . . . . . 
H1193 H 0.4606 0.6141 0.0106 0.0523 1.0000 Uiso R . . . . . 
H1201 H 0.4463 0.7319 0.1365 0.0566 1.0000 Uiso R . . . . . 
H1202 H 0.4201 0.8106 0.0848 0.0558 1.0000 Uiso R . . . . . 
H1203 H 0.4464 0.8774 0.1400 0.0556 1.0000 Uiso R . . . . . 
H1211 H 0.5735 0.9172 0.2083 0.0497 1.0000 Uiso R . . . . . 
H1212 H 0.5254 0.9644 0.1940 0.0491 1.0000 Uiso R . . . . . 
H1213 H 0.5371 0.8320 0.2171 0.0491 1.0000 Uiso R . . . . . 
H1221 H 0.6244 0.8269 0.1120 0.0531 1.0000 Uiso R . . . . . 
H1222 H 0.6207 0.8681 0.1679 0.0532 1.0000 Uiso R . . . . . 
H1223 H 0.6201 0.7263 0.1536 0.0532 1.0000 Uiso R . . . . . 
H1231 H 0.5875 0.7300 0.0314 0.0502 1.0000 Uiso R . . . . . 
H1232 H 0.5391 0.7307 -0.0138 0.0498 1.0000 Uiso R . . . . . 
H1233 H 0.5543 0.6168 0.0248 0.0507 1.0000 Uiso R . . . . . 
H2031 H 0.0561 1.2166 0.2246 0.0401 1.0000 Uiso R . . . . . 
H2041 H 0.0662 1.4065 0.2692 0.0463 1.0000 Uiso R . . . . . 
H2051 H 0.0497 1.5899 0.2200 0.0454 1.0000 Uiso R . . . . . 
H2061 H 0.0238 1.5835 0.1259 0.0437 1.0000 Uiso R . . . . . 
H2071 H 0.0144 1.3929 0.0819 0.0347 1.0000 Uiso R . . . . . 
H2081 H 0.1009 1.2437 0.1133 0.0309 1.0000 Uiso R . . . . . 
H2091 H 0.1622 1.1821 0.1863 0.0578 1.0000 Uiso R . . . . . 
H2092 H 0.1203 1.1797 0.2048 0.0580 1.0000 Uiso R . . . . . 
H2093 H 0.1399 1.0535 0.1906 0.0583 1.0000 Uiso R . . . . . 
H2101 H 0.1285 1.0032 0.0929 0.0502 1.0000 Uiso R . . . . . 
H2102 H 0.1107 1.1083 0.0490 0.0492 1.0000 Uiso R . . . . . 
H2103 H 0.1566 1.1254 0.0963 0.0498 1.0000 Uiso R . . . . . 
H2111 H -0.0518 1.2527 0.0999 0.0325 1.0000 Uiso R . . . . . 
H2121 H -0.0536 1.0592 0.1709 0.0592 1.0000 Uiso R . . . . . 
H2122 H -0.0277 1.1860 0.1896 0.0593 1.0000 Uiso R . . . . . 
H2123 H -0.0806 1.1842 0.1651 0.0589 1.0000 Uiso R . . . . . 
H2131 H -0.1197 1.1514 0.0673 0.0516 1.0000 Uiso R . . . . . 
H2132 H -0.0927 1.1189 0.0291 0.0519 1.0000 Uiso R . . . . . 
H2133 H -0.0959 1.0221 0.0723 0.0522 1.0000 Uiso R . . . . . 
H2191 H 0.0107 0.8872 0.2025 0.0551 1.0000 Uiso R . . . . . 
H2192 H 0.0472 0.9731 0.1952 0.0547 1.0000 Uiso R . . . . . 
H2193 H 0.0594 0.8385 0.2187 0.0548 1.0000 Uiso R . . . . . 
H2201 H 0.1149 0.7265 0.1614 0.0567 1.0000 Uiso R . . . . . 
H2202 H 0.1166 0.8716 0.1666 0.0558 1.0000 Uiso R . . . . . 
H2203 H 0.1221 0.8098 0.1158 0.0563 1.0000 Uiso R . . . . . 
H2211 H 0.0393 0.7328 -0.0126 0.0519 1.0000 Uiso R . . . . . 
H2212 H 0.0865 0.7250 0.0347 0.0524 1.0000 Uiso R . . . . . 
H2213 H 0.0519 0.6163 0.0245 0.0521 1.0000 Uiso R . . . . . 
H2221 H -0.0763 0.7207 0.0085 0.0562 1.0000 Uiso R . . . . . 
H2222 H -0.0467 0.7380 -0.0274 0.0561 1.0000 Uiso R . . . . . 
H2223 H -0.0430 0.6156 0.0071 0.0562 1.0000 Uiso R . . . . . 
H2231 H -0.0844 0.8138 0.0789 0.0669 1.0000 Uiso R . . . . . 
H2232 H -0.0591 0.8721 0.1363 0.0668 1.0000 Uiso R . . . . . 
H2233 H -0.0609 0.7275 0.1287 0.0671 1.0000 Uiso R . . . . . 
loop_
_atom_site_aniso_label
_atom_site_aniso_U_11
_atom_site_aniso_U_22
_atom_site_aniso_U_33
_atom_site_aniso_U_23
_atom_site_aniso_U_13
_atom_site_aniso_U_12
Ti1 0.0151(2) 0.0248(2) 0.0210(2) -0.00488(16) 0.00717(16) -0.00154(16) 
Ti2 0.0153(2) 0.0268(2) 0.0211(2) -0.00544(17) 0.00743(16) -0.00179(17) 
Ti3 0.0148(2) 0.01233(17) 0.01383(17) 0.00108(14) 0.00486(14) 0.00013(14) 
Ti4 0.0154(2) 0.01300(17) 0.01560(17) 0.00062(14) 0.00516(14) 0.00006(14) 
N1 0.0190(10) 0.0235(10) 0.0226(9) -0.0028(8) 0.0079(8) 0.0030(8) 
N2 0.0218(11) 0.0247(10) 0.0239(10) -0.0009(8) 0.0061(8) 0.0024(8) 
N3 0.0212(11) 0.0263(10) 0.0253(10) -0.0021(8) 0.0064(8) 0.0030(8) 
N4 0.0203(10) 0.0300(11) 0.0232(10) 0.0010(8) 0.0103(8) 0.0060(8) 
N101 0.0225(10) 0.0158(9) 0.0218(9) -0.0020(7) 0.0083(8) -0.0029(7) 
N102 0.0188(10) 0.0179(9) 0.0201(9) 0.0006(7) 0.0074(7) 0.0046(7) 
N201 0.0200(10) 0.0174(9) 0.0232(9) -0.0019(7) 0.0080(8) -0.0020(7) 
N202 0.0192(10) 0.0191(10) 0.0242(10) -0.0014(7) 0.0069(8) 0.0022(7) 
O1 0.0210(9) 0.0260(8) 0.0239(8) -0.0037(7) 0.0060(7) 0.0010(7) 
O2 0.0216(9) 0.0255(8) 0.0237(8) -0.0050(7) 0.0055(7) 0.0018(7) 
O101 0.0142(8) 0.0235(8) 0.0187(7) 0.0018(6) 0.0054(6) 0.0008(6) 
O201 0.0143(8) 0.0259(8) 0.0190(7) 0.0022(6) 0.0050(6) 0.0006(6) 
C1 0.0170(12) 0.0282(11) 0.0195(10) -0.0048(9) 0.0029(9) -0.0008(9) 
C2 0.0230(13) 0.0292(12) 0.0249(11) 0.0013(10) 0.0096(10) 0.0038(10) 
C3 0.0316(15) 0.0591(19) 0.0288(13) -0.0070(13) 0.0116(11) -0.0053(14) 
C4 0.052(2) 0.067(2) 0.0257(13) -0.0059(14) 0.0157(13) 0.0022(17) 
C5 0.0545(19) 0.0443(16) 0.0386(15) 0.0042(13) 0.0310(15) 0.0055(14) 
C6 0.0415(17) 0.0384(15) 0.0532(18) -0.0018(14) 0.0323(15) -0.0033(13) 
C7 0.0347(15) 0.0366(14) 0.0352(14) -0.0057(12) 0.0182(12) -0.0055(12) 
C8 0.0201(12) 0.0297(13) 0.0304(13) -0.0037(10) 0.0094(10) 0.0033(10) 
C9 0.0302(15) 0.0356(14) 0.0361(14) 0.0037(11) 0.0077(11) 0.0122(11) 
C10 0.0366(17) 0.0422(17) 0.0500(18) -0.0165(14) 0.0016(14) 0.0136(13) 
C11 0.0285(14) 0.0264(12) 0.0284(12) 0.0015(10) 0.0073(10) 0.0022(10) 
C12 0.060(2) 0.0412(17) 0.0318(15) 0.0056(13) 0.0034(14) 0.0064(15) 
C13 0.0525(19) 0.0306(14) 0.0475(17) 0.0028(12) 0.0232(15) 0.0115(13) 
C14 0.0266(15) 0.0339(15) 0.072(2) -0.0047(14) 0.0308(15) -0.0075(11) 
C15 0.0287(14) 0.0417(15) 0.0276(13) -0.0060(11) 0.0118(11) -0.0200(11) 
C16 0.0154(12) 0.0232(12) 0.0545(17) -0.0020(11) 0.0079(11) -0.0062(9) 
C17 0.0209(13) 0.0508(17) 0.0266(13) -0.0123(12) 0.0065(10) -0.0177(11) 
C18 0.0172(13) 0.0451(17) 0.060(2) 0.0116(14) 0.0093(13) -0.0052(11) 
C19 0.056(2) 0.050(2) 0.172(5) -0.043(3) 0.078(3) -0.0191(18) 
C20 0.057(2) 0.126(4) 0.0335(17) -0.006(2) 0.0188(16) -0.055(2) 
C21 0.040(2) 0.0312(17) 0.133(4) 0.011(2) 0.030(2) -0.0029(14) 
C22 0.040(2) 0.131(4) 0.047(2) -0.046(2) 0.0153(16) -0.035(2) 
C23 0.0273(19) 0.104(4) 0.116(4) 0.066(3) 0.000(2) -0.006(2) 
C24 0.0148(11) 0.0305(13) 0.0219(11) -0.0047(9) 0.0043(9) -0.0034(9) 
C25 0.0276(13) 0.0259(12) 0.0296(12) 0.0008(10) 0.0135(10) 0.0003(10) 
C26 0.0406(17) 0.0502(18) 0.0254(13) 0.0050(12) 0.0122(12) 0.0001(13) 
C27 0.073(3) 0.055(2) 0.0295(14) 0.0134(14) 0.0264(16) 0.0144(17) 
C28 0.078(3) 0.0393(17) 0.062(2) 0.0163(15) 0.054(2) 0.0104(16) 
C29 0.050(2) 0.0343(15) 0.081(2) -0.0022(16) 0.0462(19) -0.0054(14) 
C30 0.0356(16) 0.0357(15) 0.0495(17) -0.0111(13) 0.0250(13) -0.0069(12) 
C31 0.0262(13) 0.0312(13) 0.0312(13) 0.0003(10) 0.0074(11) 0.0017(10) 
C32 0.059(2) 0.0378(17) 0.0484(19) 0.0053(14) -0.0119(16) 0.0048(15) 
C33 0.0504(19) 0.0322(15) 0.0544(19) 0.0028(13) 0.0225(15) 0.0110(13) 
C34 0.0214(12) 0.0319(13) 0.0277(12) -0.0017(10) 0.0096(10) 0.0052(10) 
C35 0.0376(16) 0.0408(15) 0.0328(14) -0.0065(12) 0.0114(12) 0.0088(12) 
C36 0.0394(16) 0.0396(15) 0.0310(13) 0.0038(12) 0.0109(12) 0.0164(12) 
C37 0.0297(14) 0.0528(17) 0.0234(12) -0.0095(12) 0.0078(11) -0.0230(13) 
C38 0.0315(15) 0.0370(15) 0.0539(18) -0.0130(13) 0.0265(13) -0.0135(12) 
C39 0.0260(14) 0.0311(13) 0.0486(16) -0.0022(12) 0.0177(12) -0.0052(11) 
C40 0.0196(12) 0.0301(12) 0.0261(12) -0.0060(10) 0.0092(9) -0.0105(9) 
C41 0.0160(12) 0.0349(13) 0.0359(13) -0.0005(11) 0.0079(10) -0.0070(10) 
C42 0.060(2) 0.094(3) 0.0263(15) -0.0100(17) 0.0102(15) -0.042(2) 
C43 0.056(2) 0.052(2) 0.090(3) -0.039(2) 0.046(2) -0.0218(17) 
C44 0.045(2) 0.0412(17) 0.079(2) 0.0225(17) 0.0300(18) 0.0052(14) 
C45 0.0325(15) 0.0474(17) 0.0337(14) -0.0115(12) 0.0163(12) -0.0185(13) 
C46 0.0281(16) 0.0449(17) 0.071(2) 0.0089(16) 0.0138(15) 0.0026(13) 
C101 0.0231(12) 0.0153(10) 0.0144(10) 0.0026(8) 0.0053(9) 0.0026(8) 
C102 0.0250(13) 0.0167(11) 0.0209(11) -0.0006(8) 0.0069(9) 0.0026(9) 
C103 0.0494(17) 0.0212(12) 0.0216(12) 0.0004(9) 0.0120(11) 0.0010(11) 
C104 0.066(2) 0.0292(14) 0.0207(12) -0.0051(10) 0.0159(13) 0.0002(13) 
C105 0.0584(19) 0.0175(12) 0.0330(14) -0.0075(10) 0.0192(13) -0.0018(11) 
C106 0.0525(18) 0.0148(11) 0.0354(14) 0.0038(10) 0.0155(13) 0.0032(11) 
C107 0.0362(14) 0.0201(12) 0.0214(11) 0.0019(9) 0.0096(10) 0.0022(10) 
C108 0.0214(12) 0.0226(11) 0.0259(12) 0.0007(9) 0.0056(10) -0.0027(9) 
C109 0.0317(15) 0.0362(15) 0.0285(13) -0.0008(11) 0.0005(11) -0.0055(11) 
C110 0.0210(13) 0.0329(14) 0.0368(14) 0.0021(11) 0.0115(11) -0.0011(10) 
C111 0.0244(13) 0.0223(11) 0.0272(12) 0.0033(9) 0.0118(10) 0.0066(9) 
C112 0.0394(16) 0.0456(16) 0.0299(13) 0.0006(12) 0.0201(12) 0.0066(12) 
C113 0.0203(13) 0.0364(14) 0.0345(13) 0.0057(11) 0.0112(10) 0.0076(10) 
C114 0.0231(12) 0.0143(10) 0.0209(11) 0.0037(8) 0.0049(9) -0.0016(8) 
C115 0.0217(12) 0.0131(10) 0.0265(11) 0.0057(8) 0.0100(9) -0.0003(8) 
C116 0.0259(12) 0.0142(10) 0.0170(10) 0.0037(8) 0.0074(9) 0.0008(8) 
C117 0.0215(12) 0.0169(10) 0.0212(11) 0.0050(8) 0.0074(9) 0.0020(8) 
C118 0.0255(12) 0.0123(10) 0.0211(10) 0.0031(8) 0.0097(9) 0.0014(8) 
C119 0.0379(16) 0.0230(12) 0.0291(13) 0.0010(10) -0.0011(11) -0.0080(11) 
C120 0.0296(15) 0.0288(13) 0.0555(17) 0.0074(12) 0.0254(13) 0.0005(11) 
C121 0.0414(15) 0.0257(13) 0.0183(11) 0.0007(9) 0.0082(10) 0.0011(10) 
C122 0.0232(14) 0.0268(13) 0.0425(15) 0.0071(11) 0.0045(11) 0.0056(10) 
C123 0.0469(17) 0.0213(12) 0.0344(14) 0.0001(10) 0.0250(13) 0.0044(11) 
C201 0.0258(12) 0.0160(10) 0.0162(10) 0.0022(8) 0.0069(9) 0.0027(8) 
C202 0.0242(12) 0.0199(11) 0.0214(11) -0.0017(9) 0.0078(9) -0.0007(9) 
C203 0.0499(17) 0.0216(12) 0.0218(12) 0.0006(9) 0.0097(12) 0.0049(11) 
C204 0.0536(18) 0.0327(14) 0.0229(12) -0.0069(11) 0.0115(12) 0.0018(13) 
C205 0.0534(18) 0.0190(12) 0.0361(14) -0.0084(10) 0.0171(13) 0.0005(11) 
C206 0.0526(18) 0.0177(12) 0.0344(14) 0.0028(10) 0.0161(13) 0.0014(11) 
C207 0.0379(15) 0.0202(12) 0.0208(11) 0.0002(9) 0.0078(10) 0.0010(10) 
C208 0.0190(12) 0.0220(11) 0.0279(12) -0.0014(9) 0.0037(10) -0.0027(9) 
C209 0.0302(15) 0.0382(15) 0.0305(14) -0.0013(11) -0.0020(11) -0.0018(12) 
C210 0.0206(13) 0.0341(14) 0.0392(14) 0.0023(11) 0.0103(11) -0.0015(10) 
C211 0.0236(13) 0.0244(11) 0.0283(12) 0.0023(9) 0.0129(10) 0.0046(9) 
C212 0.0382(16) 0.0439(16) 0.0338(14) 0.0040(12) 0.0210(12) 0.0088(12) 
C213 0.0195(13) 0.0381(15) 0.0392(14) 0.0033(11) 0.0121(11) 0.0032(10) 
C214 0.0306(13) 0.0171(10) 0.0205(11) 0.0029(9) 0.0102(10) 0.0001(9) 
C215 0.0204(12) 0.0146(10) 0.0244(11) 0.0047(8) 0.0061(9) 0.0022(8) 
C216 0.0267(12) 0.0133(10) 0.0230(11) 0.0039(8) 0.0097(9) 0.0024(9) 
C217 0.0248(12) 0.0135(10) 0.0231(11) 0.0037(8) 0.0050(9) -0.0012(8) 
C218 0.0258(13) 0.0166(10) 0.0293(12) 0.0058(9) 0.0142(10) 0.0000(9) 
C219 0.0550(18) 0.0266(13) 0.0227(12) 0.0018(10) 0.0153(12) 0.0030(12) 
C220 0.0204(13) 0.0290(13) 0.0450(16) 0.0039(11) -0.0015(11) -0.0004(10) 
C221 0.0486(17) 0.0233(12) 0.0330(14) 0.0008(10) 0.0227(13) 0.0066(11) 
C222 0.0373(16) 0.0230(12) 0.0337(14) 0.0000(10) -0.0010(12) -0.0084(11) 
C223 0.0391(17) 0.0285(14) 0.070(2) 0.0067(13) 0.0372(16) 0.0005(12) 

_refine_ls_extinction_method 
    'None'
_oxford_refine_ls_scale 0.1887(2) 
loop_
 _geom_bond_atom_site_label_1
 _geom_bond_site_symmetry_1
 _geom_bond_atom_site_label_2
 _geom_bond_site_symmetry_2
 _geom_bond_distance
 _geom_bond_publ_flag
Ti1 . N1 . 2.1954(19)    yes
Ti1 . N2 . 2.195(2)    yes
Ti1 . O1 . 1.8670(17)    yes
Ti1 . O2 . 1.8572(18)    yes
Ti1 . C14 . 2.397(3)    yes
Ti1 . C15 . 2.377(2)    yes
Ti1 . C16 . 2.458(2)    yes
Ti1 . C17 . 2.510(3)    yes
Ti1 . C18 . 2.489(3)    yes
Ti2 . N3 . 2.215(2)    yes
Ti2 . N4 . 2.168(2)    yes
Ti2 . O1 . 1.8599(18)    yes
Ti2 . O2 . 1.8614(17)    yes
Ti2 . C37 . 2.509(3)    yes
Ti2 . C38 . 2.552(3)    yes
Ti2 . C39 . 2.452(3)    yes
Ti2 . C40 . 2.337(2)    yes
Ti2 . C41 . 2.416(3)    yes
Ti3 . O101 2_675 1.8644(16)    yes
Ti3 . N101 . 2.1869(19)    yes
Ti3 . N102 . 2.2042(18)    yes
Ti3 . O101 . 1.8549(17)    yes
Ti3 . C114 . 2.389(2)    yes
Ti3 . C115 . 2.465(2)    yes
Ti3 . C116 . 2.502(2)    yes
Ti3 . C117 . 2.493(2)    yes
Ti3 . C118 . 2.405(2)    yes
Ti4 . O201 2_575 1.8625(16)    yes
Ti4 . N201 . 2.190(2)    yes
Ti4 . N202 . 2.1913(19)    yes
Ti4 . O201 . 1.8530(17)    yes
Ti4 . C214 . 2.509(2)    yes
Ti4 . C215 . 2.485(2)    yes
Ti4 . C216 . 2.395(2)    yes
Ti4 . C217 . 2.392(2)    yes
Ti4 . C218 . 2.483(2)    yes
N1 . C1 . 1.324(3)    yes
N1 . C8 . 1.472(3)    yes
N2 . C1 . 1.331(3)    yes
N2 . C11 . 1.478(3)    yes
N3 . C24 . 1.325(3)    yes
N3 . C31 . 1.465(3)    yes
N4 . C24 . 1.328(3)    yes
N4 . C34 . 1.475(3)    yes
N101 . C101 . 1.332(3)    yes
N101 . C108 . 1.471(3)    yes
N102 . C101 . 1.324(3)    yes
N102 . C111 . 1.475(3)    yes
N201 . C201 . 1.329(3)    yes
N201 . C208 . 1.474(3)    yes
N202 . C201 . 1.328(3)    yes
N202 . C211 . 1.473(3)    yes
C1 . C2 . 1.510(3)    yes
C2 . C3 . 1.394(4)    yes
C2 . C7 . 1.388(4)    yes
C3 . C4 . 1.392(4)    yes
C3 . H31 . 0.953    no
C4 . C5 . 1.381(5)    yes
C4 . H41 . 0.960    no
C5 . C6 . 1.368(5)    yes
C5 . H51 . 0.958    no
C6 . C7 . 1.395(4)    yes
C6 . H61 . 0.958    no
C7 . H71 . 0.955    no
C8 . C9 . 1.512(4)    yes
C8 . C10 . 1.512(4)    yes
C8 . H81 . 1.010    no
C9 . H91 . 0.981    no
C9 . H92 . 0.972    no
C9 . H93 . 0.968    no
C10 . H101 . 0.984    no
C10 . H102 . 0.975    no
C10 . H103 . 0.970    no
C11 . C12 . 1.531(4)    yes
C11 . C13 . 1.522(4)    yes
C11 . H111 . 1.013    no
C12 . H121 . 0.982    no
C12 . H122 . 0.980    no
C12 . H123 . 0.981    no
C13 . H131 . 0.981    no
C13 . H132 . 0.957    no
C13 . H133 . 0.963    no
C14 . C15 . 1.395(4)    yes
C14 . C18 . 1.374(5)    yes
C14 . C19 . 1.514(4)    yes
C15 . C16 . 1.419(4)    yes
C15 . C20 . 1.496(4)    yes
C16 . C17 . 1.411(4)    yes
C16 . C21 . 1.498(4)    yes
C17 . C18 . 1.394(4)    yes
C17 . C22 . 1.505(4)    yes
C18 . C23 . 1.503(5)    yes
C19 . H191 . 0.995    no
C19 . H192 . 0.987    no
C19 . H193 . 0.974    no
C20 . H201 . 0.989    no
C20 . H202 . 0.971    no
C20 . H203 . 0.991    no
C21 . H211 . 1.018    no
C21 . H212 . 0.987    no
C21 . H213 . 0.977    no
C22 . H221 . 0.983    no
C22 . H222 . 0.973    no
C22 . H223 . 0.978    no
C23 . H231 . 0.987    no
C23 . H232 . 0.982    no
C23 . H233 . 0.977    no
C24 . C25 . 1.504(3)    yes
C25 . C26 . 1.390(4)    yes
C25 . C30 . 1.392(4)    yes
C26 . C27 . 1.390(4)    yes
C26 . H261 . 0.966    no
C27 . C28 . 1.375(5)    yes
C27 . H271 . 0.953    no
C28 . C29 . 1.363(5)    yes
C28 . H281 . 0.945    no
C29 . C30 . 1.397(4)    yes
C29 . H291 . 0.954    no
C30 . H301 . 0.965    no
C31 . C32 . 1.520(4)    yes
C31 . C33 . 1.522(4)    yes
C31 . H311 . 0.997    no
C32 . H321 . 0.974    no
C32 . H322 . 0.979    no
C32 . H323 . 0.981    no
C33 . H331 . 0.979    no
C33 . H332 . 0.955    no
C33 . H333 . 0.981    no
C34 . C35 . 1.522(4)    yes
C34 . C36 . 1.517(4)    yes
C34 . H341 . 1.004    no
C35 . H351 . 0.970    no
C35 . H352 . 0.964    no
C35 . H353 . 0.969    no
C36 . H361 . 0.990    no
C36 . H362 . 0.987    no
C36 . H363 . 0.969    no
C37 . C38 . 1.403(5)    yes
C37 . C41 . 1.430(4)    yes
C37 . C42 . 1.500(4)    yes
C38 . C39 . 1.371(4)    yes
C38 . C43 . 1.515(4)    yes
C39 . C40 . 1.409(4)    yes
C39 . C44 . 1.512(4)    yes
C40 . C41 . 1.417(4)    yes
C40 . C45 . 1.505(3)    yes
C41 . C46 . 1.487(4)    yes
C42 . H421 . 1.015    no
C42 . H422 . 0.980    no
C42 . H423 . 0.975    no
C43 . H431 . 0.989    no
C43 . H432 . 0.991    no
C43 . H433 . 0.999    no
C44 . H441 . 1.003    no
C44 . H442 . 0.980    no
C44 . H443 . 0.985    no
C45 . H451 . 0.989    no
C45 . H452 . 0.988    no
C45 . H453 . 0.994    no
C46 . H461 . 0.997    no
C46 . H462 . 0.979    no
C46 . H463 . 0.993    no
C101 . C102 . 1.506(3)    yes
C102 . C103 . 1.395(3)    yes
C102 . C107 . 1.392(3)    yes
C103 . C104 . 1.386(4)    yes
C103 . H1031 . 0.953    no
C104 . C105 . 1.381(4)    yes
C104 . H1041 . 0.946    no
C105 . C106 . 1.380(4)    yes
C105 . H1051 . 0.946    no
C106 . C107 . 1.390(3)    yes
C106 . H1061 . 0.942    no
C107 . H1071 . 0.941    no
C108 . C109 . 1.533(3)    yes
C108 . C110 . 1.515(3)    yes
C108 . H1081 . 1.000    no
C109 . H1091 . 0.970    no
C109 . H1092 . 0.976    no
C109 . H1093 . 0.968    no
C110 . H1101 . 0.969    no
C110 . H1102 . 0.965    no
C110 . H1103 . 0.974    no
C111 . C112 . 1.528(3)    yes
C111 . C113 . 1.510(4)    yes
C111 . H1111 . 0.997    no
C112 . H1121 . 0.969    no
C112 . H1122 . 0.972    no
C112 . H1123 . 0.968    no
C113 . H1131 . 0.973    no
C113 . H1132 . 0.969    no
C113 . H1133 . 0.976    no
C114 . C115 . 1.412(3)    yes
C114 . C118 . 1.425(3)    yes
C114 . C119 . 1.496(3)    yes
C115 . C116 . 1.419(3)    yes
C115 . C120 . 1.497(3)    yes
C116 . C117 . 1.419(3)    yes
C116 . C121 . 1.498(3)    yes
C117 . C118 . 1.403(3)    yes
C117 . C122 . 1.504(3)    yes
C118 . C123 . 1.501(3)    yes
C119 . H1191 . 0.971    no
C119 . H1192 . 0.963    no
C119 . H1193 . 0.971    no
C120 . H1201 . 0.967    no
C120 . H1202 . 0.968    no
C120 . H1203 . 0.971    no
C121 . H1211 . 0.962    no
C121 . H1212 . 0.950    no
C121 . H1213 . 0.963    no
C122 . H1221 . 0.977    no
C122 . H1222 . 0.968    no
C122 . H1223 . 0.965    no
C123 . H1231 . 0.975    no
C123 . H1232 . 0.976    no
C123 . H1233 . 0.965    no
C201 . C202 . 1.506(3)    yes
C202 . C203 . 1.392(3)    yes
C202 . C207 . 1.387(3)    yes
C203 . C204 . 1.388(4)    yes
C203 . H2031 . 0.951    no
C204 . C205 . 1.385(4)    yes
C204 . H2041 . 0.949    no
C205 . C206 . 1.382(4)    yes
C205 . H2051 . 0.952    no
C206 . C207 . 1.391(3)    yes
C206 . H2061 . 0.950    no
C207 . H2071 . 0.942    no
C208 . C209 . 1.533(3)    yes
C208 . C210 . 1.515(4)    yes
C208 . H2081 . 1.001    no
C209 . H2091 . 0.974    no
C209 . H2092 . 0.979    no
C209 . H2093 . 0.979    no
C210 . H2101 . 0.978    no
C210 . H2102 . 0.971    no
C210 . H2103 . 0.968    no
C211 . C212 . 1.528(3)    yes
C211 . C213 . 1.521(4)    yes
C211 . H2111 . 0.994    no
C212 . H2121 . 0.969    no
C212 . H2122 . 0.975    no
C212 . H2123 . 0.970    no
C213 . H2131 . 0.967    no
C213 . H2132 . 0.969    no
C213 . H2133 . 0.971    no
C214 . C215 . 1.413(3)    yes
C214 . C218 . 1.419(4)    yes
C214 . C219 . 1.501(3)    yes
C215 . C216 . 1.408(3)    yes
C215 . C220 . 1.496(3)    yes
C216 . C217 . 1.422(3)    yes
C216 . C221 . 1.496(3)    yes
C217 . C218 . 1.408(3)    yes
C217 . C222 . 1.497(3)    yes
C218 . C223 . 1.501(3)    yes
C219 . H2191 . 0.959    no
C219 . H2192 . 0.961    no
C219 . H2193 . 0.967    no
C220 . H2201 . 0.969    no
C220 . H2202 . 0.958    no
C220 . H2203 . 0.973    no
C221 . H2211 . 0.973    no
C221 . H2212 . 0.979    no
C221 . H2213 . 0.965    no
C222 . H2221 . 0.967    no
C222 . H2222 . 0.979    no
C222 . H2223 . 0.967    no
C223 . H2231 . 0.968    no
C223 . H2232 . 0.966    no
C223 . H2233 . 0.962    no
loop_
 _geom_angle_atom_site_label_1
 _geom_angle_site_symmetry_1
 _geom_angle_atom_site_label_2
 _geom_angle_site_symmetry_2
 _geom_angle_atom_site_label_3
 _geom_angle_site_symmetry_3
 _geom_angle
 _geom_angle_publ_flag
N1 . Ti1 . N2 . 60.60(8)    yes
N1 . Ti1 . O1 . 134.02(8)    yes
N2 . Ti1 . O1 . 91.67(7)    yes
N1 . Ti1 . O2 . 90.03(8)    yes
N2 . Ti1 . O2 . 130.24(8)    yes
O1 . Ti1 . O2 . 81.17(8)    yes
N1 . Ti1 . C14 . 135.88(10)    yes
N2 . Ti1 . C14 . 111.12(11)    yes
O1 . Ti1 . C14 . 86.47(9)    yes
O2 . Ti1 . C14 . 117.40(10)    yes
N1 . Ti1 . C15 . 121.97(9)    yes
N2 . Ti1 . C15 . 138.33(9)    yes
O1 . Ti1 . C15 . 103.30(9)    yes
O2 . Ti1 . C15 . 90.78(9)    yes
C14 . Ti1 . C15 . 33.98(10)    yes
N1 . Ti1 . C16 . 88.54(9)    yes
N2 . Ti1 . C16 . 118.54(9)    yes
O1 . Ti1 . C16 . 137.26(9)    yes
O2 . Ti1 . C16 . 97.90(9)    yes
C14 . Ti1 . C16 . 55.81(9)    yes
N1 . Ti1 . C17 . 81.58(9)    yes
N2 . Ti1 . C17 . 87.49(9)    yes
O1 . Ti1 . C17 . 136.88(9)    yes
O2 . Ti1 . C17 . 129.78(9)    yes
C14 . Ti1 . C17 . 54.32(10)    yes
N1 . Ti1 . C18 . 107.28(10)    yes
N2 . Ti1 . C18 . 83.57(10)    yes
O1 . Ti1 . C18 . 104.69(10)    yes
O2 . Ti1 . C18 . 145.95(9)    yes
C14 . Ti1 . C18 . 32.59(11)    yes
C15 . Ti1 . C16 . 34.08(9)    yes
C15 . Ti1 . C17 . 55.16(9)    yes
C16 . Ti1 . C17 . 32.99(9)    yes
C15 . Ti1 . C18 . 55.18(10)    yes
C16 . Ti1 . C18 . 54.84(9)    yes
C17 . Ti1 . C18 . 32.38(10)    yes
N3 . Ti2 . N4 . 60.61(8)    yes
N3 . Ti2 . O1 . 132.57(8)    yes
N4 . Ti2 . O1 . 92.13(8)    yes
N3 . Ti2 . O2 . 88.83(8)    yes
N4 . Ti2 . O2 . 130.81(8)    yes
O1 . Ti2 . O2 . 81.25(7)    yes
N3 . Ti2 . C37 . 81.26(9)    yes
N4 . Ti2 . C37 . 91.01(9)    yes
O1 . Ti2 . C37 . 141.39(9)    yes
O2 . Ti2 . C37 . 123.56(9)    yes
N3 . Ti2 . C38 . 103.06(9)    yes
N4 . Ti2 . C38 . 81.54(9)    yes
O1 . Ti2 . C38 . 110.74(9)    yes
O2 . Ti2 . C38 . 146.22(8)    yes
C37 . Ti2 . C38 . 32.18(10)    yes
N3 . Ti2 . C39 . 133.85(9)    yes
N4 . Ti2 . C39 . 104.09(9)    yes
O1 . Ti2 . C39 . 87.70(10)    yes
O2 . Ti2 . C39 . 124.07(9)    yes
C37 . Ti2 . C39 . 54.32(10)    yes
N3 . Ti2 . C40 . 129.28(9)    yes
N4 . Ti2 . C40 . 135.73(9)    yes
O1 . Ti2 . C40 . 97.69(9)    yes
O2 . Ti2 . C40 . 93.40(8)    yes
C37 . Ti2 . C40 . 55.87(9)    yes
N3 . Ti2 . C41 . 94.62(9)    yes
N4 . Ti2 . C41 . 124.34(9)    yes
O1 . Ti2 . C41 . 131.97(9)    yes
O2 . Ti2 . C41 . 93.30(9)    yes
C37 . Ti2 . C41 . 33.69(9)    yes
C38 . Ti2 . C39 . 31.72(10)    yes
C38 . Ti2 . C40 . 54.59(9)    yes
C39 . Ti2 . C40 . 34.13(9)    yes
C38 . Ti2 . C41 . 54.75(9)    yes
C39 . Ti2 . C41 . 56.28(9)    yes
C40 . Ti2 . C41 . 34.65(9)    yes
O101 2_675 Ti3 . N101 . 90.15(8)    yes
O101 2_675 Ti3 . N102 . 132.00(7)    yes
N101 . Ti3 . N102 . 60.66(7)    yes
O101 2_675 Ti3 . O101 . 81.38(8)    yes
N101 . Ti3 . O101 . 130.02(7)    yes
N102 . Ti3 . O101 . 89.62(7)    yes
O101 2_675 Ti3 . C114 . 109.40(8)    yes
N101 . Ti3 . C114 . 139.03(8)    yes
N102 . Ti3 . C114 . 117.56(8)    yes
O101 . Ti3 . C114 . 89.30(7)    yes
O101 2_675 Ti3 . C115 . 141.97(7)    yes
N101 . Ti3 . C115 . 114.13(8)    yes
N102 . Ti3 . C115 . 86.03(7)    yes
O101 . Ti3 . C115 . 101.49(8)    yes
C114 . Ti3 . C115 . 33.77(8)    yes
O101 2_675 Ti3 . C116 . 134.07(7)    yes
N101 . Ti3 . C116 . 84.56(7)    yes
N102 . Ti3 . C116 . 83.58(7)    yes
O101 . Ti3 . C116 . 134.37(7)    yes
C114 . Ti3 . C116 . 55.76(7)    yes
O101 2_675 Ti3 . C117 . 101.19(8)    yes
N101 . Ti3 . C117 . 85.86(8)    yes
N102 . Ti3 . C117 . 112.53(7)    yes
O101 . Ti3 . C117 . 144.12(7)    yes
C114 . Ti3 . C117 . 55.80(8)    yes
O101 2_675 Ti3 . C118 . 87.33(7)    yes
N101 . Ti3 . C118 . 116.15(8)    yes
N102 . Ti3 . C118 . 138.46(7)    yes
O101 . Ti3 . C118 . 112.54(8)    yes
C114 . Ti3 . C118 . 34.58(8)    yes
C115 . Ti3 . C116 . 33.19(8)    yes
C115 . Ti3 . C117 . 55.06(8)    yes
C116 . Ti3 . C117 . 33.00(7)    yes
C115 . Ti3 . C118 . 56.22(8)    yes
C116 . Ti3 . C118 . 55.58(7)    yes
C117 . Ti3 . C118 . 33.24(8)    yes
O201 2_575 Ti4 . N201 . 89.79(7)    yes
O201 2_575 Ti4 . N202 . 131.70(7)    yes
N201 . Ti4 . N202 . 60.70(7)    yes
O201 2_575 Ti4 . O201 . 81.29(8)    yes
N201 . Ti4 . O201 . 130.22(8)    yes
N202 . Ti4 . O201 . 89.91(8)    yes
O201 2_575 Ti4 . C214 . 134.80(8)    yes
N201 . Ti4 . C214 . 85.19(8)    yes
N202 . Ti4 . C214 . 83.36(8)    yes
O201 . Ti4 . C214 . 133.58(8)    yes
O201 2_575 Ti4 . C215 . 101.99(8)    yes
N201 . Ti4 . C215 . 85.34(8)    yes
N202 . Ti4 . C215 . 111.65(8)    yes
O201 . Ti4 . C215 . 144.44(7)    yes
C214 . Ti4 . C215 . 32.86(8)    yes
O201 2_575 Ti4 . C216 . 87.57(7)    yes
N201 . Ti4 . C216 . 115.56(8)    yes
N202 . Ti4 . C216 . 138.30(8)    yes
O201 . Ti4 . C216 . 112.87(8)    yes
C214 . Ti4 . C216 . 55.43(8)    yes
O201 2_575 Ti4 . C217 . 109.19(8)    yes
N201 . Ti4 . C217 . 139.09(8)    yes
N202 . Ti4 . C217 . 118.13(8)    yes
O201 . Ti4 . C217 . 89.25(8)    yes
C214 . Ti4 . C217 . 55.50(8)    yes
O201 2_575 Ti4 . C218 . 141.65(8)    yes
N201 . Ti4 . C218 . 114.97(8)    yes
N202 . Ti4 . C218 . 86.64(8)    yes
O201 . Ti4 . C218 . 100.94(8)    yes
C214 . Ti4 . C218 . 33.03(8)    yes
C215 . Ti4 . C216 . 33.48(8)    yes
C215 . Ti4 . C217 . 55.94(8)    yes
C216 . Ti4 . C217 . 34.56(8)    yes
C215 . Ti4 . C218 . 54.95(8)    yes
C216 . Ti4 . C218 . 55.96(8)    yes
C217 . Ti4 . C218 . 33.49(8)    yes
Ti1 . N1 . C1 . 92.85(14)    yes
Ti1 . N1 . C8 . 143.56(16)    yes
C1 . N1 . C8 . 120.8(2)    yes
Ti1 . N2 . C1 . 92.66(15)    yes
Ti1 . N2 . C11 . 142.61(16)    yes
C1 . N2 . C11 . 121.6(2)    yes
Ti2 . N3 . C24 . 91.58(15)    yes
Ti2 . N3 . C31 . 143.01(16)    yes
C24 . N3 . C31 . 122.0(2)    yes
Ti2 . N4 . C24 . 93.64(15)    yes
Ti2 . N4 . C34 . 141.72(16)    yes
C24 . N4 . C34 . 122.2(2)    yes
Ti3 . N101 . C101 . 92.71(14)    yes
Ti3 . N101 . C108 . 142.98(15)    yes
C101 . N101 . C108 . 121.51(19)    yes
Ti3 . N102 . C101 . 92.16(13)    yes
Ti3 . N102 . C111 . 142.92(15)    yes
C101 . N102 . C111 . 121.41(19)    yes
Ti4 . N201 . C201 . 92.59(14)    yes
Ti4 . N201 . C208 . 141.97(15)    yes
C201 . N201 . C208 . 121.89(19)    yes
Ti4 . N202 . C201 . 92.55(14)    yes
Ti4 . N202 . C211 . 143.73(16)    yes
C201 . N202 . C211 . 121.23(19)    yes
Ti1 . O1 . Ti2 . 98.64(8)    yes
Ti2 . O2 . Ti1 . 98.94(9)    yes
Ti3 2_675 O101 . Ti3 . 98.62(8)    yes
Ti4 2_575 O201 . Ti4 . 98.71(8)    yes
N2 . C1 . N1 . 113.1(2)    yes
N2 . C1 . C2 . 124.1(2)    yes
N1 . C1 . C2 . 122.8(2)    yes
C1 . C2 . C3 . 118.9(2)    yes
C1 . C2 . C7 . 123.1(2)    yes
C3 . C2 . C7 . 118.0(2)    yes
C2 . C3 . C4 . 121.0(3)    yes
C2 . C3 . H31 . 118.7    no
C4 . C3 . H31 . 120.3    no
C3 . C4 . C5 . 120.0(3)    yes
C3 . C4 . H41 . 119.8    no
C5 . C4 . H41 . 120.1    no
C4 . C5 . C6 . 119.7(3)    yes
C4 . C5 . H51 . 120.0    no
C6 . C5 . H51 . 120.4    no
C5 . C6 . C7 . 120.6(3)    yes
C5 . C6 . H61 . 119.4    no
C7 . C6 . H61 . 120.0    no
C6 . C7 . C2 . 120.7(3)    yes
C6 . C7 . H71 . 120.3    no
C2 . C7 . H71 . 119.0    no
N1 . C8 . C9 . 110.8(2)    yes
N1 . C8 . C10 . 113.2(2)    yes
C9 . C8 . C10 . 110.5(2)    yes
N1 . C8 . H81 . 108.0    no
C9 . C8 . H81 . 107.4    no
C10 . C8 . H81 . 106.6    no
C8 . C9 . H91 . 108.2    no
C8 . C9 . H92 . 110.9    no
H91 . C9 . H92 . 111.3    no
C8 . C9 . H93 . 109.7    no
H91 . C9 . H93 . 107.5    no
H92 . C9 . H93 . 109.2    no
C8 . C10 . H101 . 107.1    no
C8 . C10 . H102 . 111.0    no
H101 . C10 . H102 . 110.2    no
C8 . C10 . H103 . 108.9    no
H101 . C10 . H103 . 109.4    no
H102 . C10 . H103 . 110.2    no
N2 . C11 . C12 . 114.0(2)    yes
N2 . C11 . C13 . 110.4(2)    yes
C12 . C11 . C13 . 110.0(2)    yes
N2 . C11 . H111 . 108.4    no
C12 . C11 . H111 . 106.3    no
C13 . C11 . H111 . 107.5    no
C11 . C12 . H121 . 103.7    no
C11 . C12 . H122 . 110.8    no
H121 . C12 . H122 . 111.2    no
C11 . C12 . H123 . 110.1    no
H121 . C12 . H123 . 109.8    no
H122 . C12 . H123 . 111.1    no
C11 . C13 . H131 . 109.5    no
C11 . C13 . H132 . 108.8    no
H131 . C13 . H132 . 110.0    no
C11 . C13 . H133 . 108.9    no
H131 . C13 . H133 . 110.7    no
H132 . C13 . H133 . 108.9    no
Ti1 . C14 . C15 . 72.22(15)    yes
Ti1 . C14 . C18 . 77.39(17)    yes
C15 . C14 . C18 . 109.1(3)    yes
Ti1 . C14 . C19 . 121.0(2)    yes
C15 . C14 . C19 . 122.7(4)    yes
C18 . C14 . C19 . 128.0(4)    yes
Ti1 . C15 . C14 . 73.80(15)    yes
Ti1 . C15 . C16 . 76.08(15)    yes
C14 . C15 . C16 . 107.8(2)    yes
Ti1 . C15 . C20 . 121.59(19)    yes
C14 . C15 . C20 . 127.0(3)    yes
C16 . C15 . C20 . 124.8(3)    yes
C15 . C16 . Ti1 . 69.84(14)    yes
C15 . C16 . C17 . 106.4(2)    yes
Ti1 . C16 . C17 . 75.53(15)    yes
C15 . C16 . C21 . 126.0(3)    yes
Ti1 . C16 . C21 . 125.07(19)    yes
C17 . C16 . C21 . 127.2(3)    yes
C16 . C17 . Ti1 . 71.48(14)    yes
C16 . C17 . C18 . 108.6(2)    yes
Ti1 . C17 . C18 . 73.00(16)    yes
C16 . C17 . C22 . 127.1(3)    yes
Ti1 . C17 . C22 . 124.6(2)    yes
C18 . C17 . C22 . 124.2(3)    yes
C17 . C18 . Ti1 . 74.62(16)    yes
C17 . C18 . C14 . 108.2(3)    yes
Ti1 . C18 . C14 . 70.02(17)    yes
C17 . C18 . C23 . 126.1(4)    yes
Ti1 . C18 . C23 . 129.2(2)    yes
C14 . C18 . C23 . 124.9(4)    yes
C14 . C19 . H191 . 104.0    no
C14 . C19 . H192 . 111.0    no
H191 . C19 . H192 . 111.9    no
C14 . C19 . H193 . 109.8    no
H191 . C19 . H193 . 108.9    no
H192 . C19 . H193 . 111.0    no
C15 . C20 . H201 . 107.3    no
C15 . C20 . H202 . 109.4    no
H201 . C20 . H202 . 109.5    no
C15 . C20 . H203 . 108.6    no
H201 . C20 . H203 . 112.0    no
H202 . C20 . H203 . 109.9    no
C16 . C21 . H211 . 107.8    no
C16 . C21 . H212 . 110.5    no
H211 . C21 . H212 . 112.9    no
C16 . C21 . H213 . 108.0    no
H211 . C21 . H213 . 109.8    no
H212 . C21 . H213 . 107.7    no
C17 . C22 . H221 . 105.4    no
C17 . C22 . H222 . 111.0    no
H221 . C22 . H222 . 111.3    no
C17 . C22 . H223 . 107.5    no
H221 . C22 . H223 . 110.5    no
H222 . C22 . H223 . 110.9    no
C18 . C23 . H231 . 107.3    no
C18 . C23 . H232 . 109.8    no
H231 . C23 . H232 . 111.2    no
C18 . C23 . H233 . 108.6    no
H231 . C23 . H233 . 109.7    no
H232 . C23 . H233 . 110.1    no
N4 . C24 . N3 . 113.0(2)    yes
N4 . C24 . C25 . 123.2(2)    yes
N3 . C24 . C25 . 123.8(2)    yes
C24 . C25 . C26 . 119.6(2)    yes
C24 . C25 . C30 . 121.5(2)    yes
C26 . C25 . C30 . 118.9(3)    yes
C25 . C26 . C27 . 120.0(3)    yes
C25 . C26 . H261 . 119.1    no
C27 . C26 . H261 . 120.8    no
C26 . C27 . C28 . 120.5(3)    yes
C26 . C27 . H271 . 119.3    no
C28 . C27 . H271 . 120.2    no
C27 . C28 . C29 . 120.2(3)    yes
C27 . C28 . H281 . 120.3    no
C29 . C28 . H281 . 119.5    no
C28 . C29 . C30 . 120.2(3)    yes
C28 . C29 . H291 . 119.8    no
C30 . C29 . H291 . 119.9    no
C29 . C30 . C25 . 120.2(3)    yes
C29 . C30 . H301 . 119.9    no
C25 . C30 . H301 . 119.9    no
N3 . C31 . C32 . 112.7(2)    yes
N3 . C31 . C33 . 111.5(2)    yes
C32 . C31 . C33 . 108.4(3)    yes
N3 . C31 . H311 . 108.6    no
C32 . C31 . H311 . 108.3    no
C33 . C31 . H311 . 107.2    no
C31 . C32 . H321 . 107.9    no
C31 . C32 . H322 . 109.1    no
H321 . C32 . H322 . 110.6    no
C31 . C32 . H323 . 108.9    no
H321 . C32 . H323 . 108.9    no
H322 . C32 . H323 . 111.4    no
C31 . C33 . H331 . 109.8    no
C31 . C33 . H332 . 108.8    no
H331 . C33 . H332 . 110.4    no
C31 . C33 . H333 . 108.2    no
H331 . C33 . H333 . 110.5    no
H332 . C33 . H333 . 109.1    no
N4 . C34 . C35 . 113.8(2)    yes
N4 . C34 . C36 . 110.3(2)    yes
C35 . C34 . C36 . 109.8(2)    yes
N4 . C34 . H341 . 107.9    no
C35 . C34 . H341 . 107.3    no
C36 . C34 . H341 . 107.4    no
C34 . C35 . H351 . 111.9    no
C34 . C35 . H352 . 107.6    no
H351 . C35 . H352 . 109.5    no
C34 . C35 . H353 . 109.0    no
H351 . C35 . H353 . 110.3    no
H352 . C35 . H353 . 108.5    no
C34 . C36 . H361 . 109.3    no
C34 . C36 . H362 . 109.9    no
H361 . C36 . H362 . 110.9    no
C34 . C36 . H363 . 109.0    no
H361 . C36 . H363 . 108.9    no
H362 . C36 . H363 . 108.8    no
Ti2 . C37 . C38 . 75.60(16)    yes
Ti2 . C37 . C41 . 69.61(14)    yes
C38 . C37 . C41 . 107.7(2)    yes
Ti2 . C37 . C42 . 126.98(19)    yes
C38 . C37 . C42 . 124.3(3)    yes
C41 . C37 . C42 . 127.4(3)    yes
C37 . C38 . Ti2 . 72.21(15)    yes
C37 . C38 . C39 . 109.5(2)    yes
Ti2 . C38 . C39 . 70.12(16)    yes
C37 . C38 . C43 . 123.6(3)    yes
Ti2 . C38 . C43 . 131.44(19)    yes
C39 . C38 . C43 . 126.2(3)    yes
Ti2 . C39 . C38 . 78.16(16)    yes
Ti2 . C39 . C40 . 68.45(14)    yes
C38 . C39 . C40 . 108.0(3)    yes
Ti2 . C39 . C44 . 122.3(2)    yes
C38 . C39 . C44 . 125.9(3)    yes
C40 . C39 . C44 . 126.0(3)    yes
Ti2 . C40 . C39 . 77.42(15)    yes
Ti2 . C40 . C41 . 75.74(14)    yes
C39 . C40 . C41 . 108.6(2)    yes
Ti2 . C40 . C45 . 119.23(16)    yes
C39 . C40 . C45 . 125.3(3)    yes
C41 . C40 . C45 . 125.6(3)    yes
Ti2 . C41 . C37 . 76.71(15)    yes
Ti2 . C41 . C40 . 69.60(14)    yes
C37 . C41 . C40 . 106.1(2)    yes
Ti2 . C41 . C46 . 122.37(19)    yes
C37 . C41 . C46 . 127.3(3)    yes
C40 . C41 . C46 . 126.4(3)    yes
C37 . C42 . H421 . 106.4    no
C37 . C42 . H422 . 108.7    no
H421 . C42 . H422 . 113.2    no
C37 . C42 . H423 . 108.9    no
H421 . C42 . H423 . 110.8    no
H422 . C42 . H423 . 108.7    no
C38 . C43 . H431 . 107.7    no
C38 . C43 . H432 . 110.0    no
H431 . C43 . H432 . 107.9    no
C38 . C43 . H433 . 107.9    no
H431 . C43 . H433 . 111.5    no
H432 . C43 . H433 . 111.8    no
C39 . C44 . H441 . 108.0    no
C39 . C44 . H442 . 108.9    no
H441 . C44 . H442 . 112.1    no
C39 . C44 . H443 . 108.4    no
H441 . C44 . H443 . 110.8    no
H442 . C44 . H443 . 108.5    no
C40 . C45 . H451 . 109.3    no
C40 . C45 . H452 . 108.9    no
H451 . C45 . H452 . 111.6    no
C40 . C45 . H453 . 106.3    no
H451 . C45 . H453 . 111.0    no
H452 . C45 . H453 . 109.6    no
C41 . C46 . H461 . 108.0    no
C41 . C46 . H462 . 110.1    no
H461 . C46 . H462 . 109.4    no
C41 . C46 . H463 . 108.6    no
H461 . C46 . H463 . 112.1    no
H462 . C46 . H463 . 108.6    no
N101 . C101 . N102 . 113.20(19)    yes
N101 . C101 . C102 . 123.2(2)    yes
N102 . C101 . C102 . 123.6(2)    yes
C101 . C102 . C103 . 120.2(2)    yes
C101 . C102 . C107 . 121.2(2)    yes
C103 . C102 . C107 . 118.6(2)    yes
C102 . C103 . C104 . 120.6(2)    yes
C102 . C103 . H1031 . 119.4    no
C104 . C103 . H1031 . 120.0    no
C103 . C104 . C105 . 120.1(2)    yes
C103 . C104 . H1041 . 119.7    no
C105 . C104 . H1041 . 120.2    no
C104 . C105 . C106 . 120.1(2)    yes
C104 . C105 . H1051 . 119.4    no
C106 . C105 . H1051 . 120.5    no
C105 . C106 . C107 . 120.0(2)    yes
C105 . C106 . H1061 . 120.3    no
C107 . C106 . H1061 . 119.7    no
C102 . C107 . C106 . 120.6(2)    yes
C102 . C107 . H1071 . 119.7    no
C106 . C107 . H1071 . 119.8    no
N101 . C108 . C109 . 112.8(2)    yes
N101 . C108 . C110 . 110.90(19)    yes
C109 . C108 . C110 . 109.3(2)    yes
N101 . C108 . H1081 . 108.2    no
C109 . C108 . H1081 . 107.2    no
C110 . C108 . H1081 . 108.3    no
C108 . C109 . H1091 . 109.4    no
C108 . C109 . H1092 . 111.2    no
H1091 . C109 . H1092 . 108.8    no
C108 . C109 . H1093 . 109.2    no
H1091 . C109 . H1093 . 109.8    no
H1092 . C109 . H1093 . 108.4    no
C108 . C110 . H1101 . 109.4    no
C108 . C110 . H1102 . 110.7    no
H1101 . C110 . H1102 . 108.8    no
C108 . C110 . H1103 . 109.5    no
H1101 . C110 . H1103 . 109.2    no
H1102 . C110 . H1103 . 109.3    no
N102 . C111 . C112 . 113.1(2)    yes
N102 . C111 . C113 . 110.67(19)    yes
C112 . C111 . C113 . 110.2(2)    yes
N102 . C111 . H1111 . 106.8    no
C112 . C111 . H1111 . 107.1    no
C113 . C111 . H1111 . 108.7    no
C111 . C112 . H1121 . 108.1    no
C111 . C112 . H1122 . 111.1    no
H1121 . C112 . H1122 . 109.1    no
C111 . C112 . H1123 . 108.4    no
H1121 . C112 . H1123 . 109.7    no
H1122 . C112 . H1123 . 110.5    no
C111 . C113 . H1131 . 109.7    no
C111 . C113 . H1132 . 111.5    no
H1131 . C113 . H1132 . 109.5    no
C111 . C113 . H1133 . 109.7    no
H1131 . C113 . H1133 . 107.7    no
H1132 . C113 . H1133 . 108.6    no
Ti3 . C114 . C115 . 76.06(12)    yes
Ti3 . C114 . C118 . 73.31(12)    yes
C115 . C114 . C118 . 108.0(2)    yes
Ti3 . C114 . C119 . 123.93(16)    yes
C115 . C114 . C119 . 126.4(2)    yes
C118 . C114 . C119 . 124.9(2)    yes
C114 . C115 . Ti3 . 70.17(12)    yes
C114 . C115 . C116 . 107.9(2)    yes
Ti3 . C115 . C116 . 74.82(12)    yes
C114 . C115 . C120 . 125.8(2)    yes
Ti3 . C115 . C120 . 128.34(16)    yes
C116 . C115 . C120 . 125.6(2)    yes
C115 . C116 . Ti3 . 71.99(12)    yes
C115 . C116 . C117 . 107.7(2)    yes
Ti3 . C116 . C117 . 73.17(12)    yes
C115 . C116 . C121 . 126.0(2)    yes
Ti3 . C116 . C121 . 124.24(15)    yes
C117 . C116 . C121 . 126.0(2)    yes
C116 . C117 . Ti3 . 73.83(13)    yes
C116 . C117 . C118 . 108.4(2)    yes
Ti3 . C117 . C118 . 69.93(13)    yes
C116 . C117 . C122 . 125.5(2)    yes
Ti3 . C117 . C122 . 129.34(16)    yes
C118 . C117 . C122 . 125.4(2)    yes
Ti3 . C118 . C114 . 72.11(12)    yes
Ti3 . C118 . C117 . 76.83(13)    yes
C114 . C118 . C117 . 107.9(2)    yes
Ti3 . C118 . C123 . 123.71(15)    yes
C114 . C118 . C123 . 125.4(2)    yes
C117 . C118 . C123 . 126.2(2)    yes
C114 . C119 . H1191 . 110.3    no
C114 . C119 . H1192 . 109.6    no
H1191 . C119 . H1192 . 108.7    no
C114 . C119 . H1193 . 108.8    no
H1191 . C119 . H1193 . 109.5    no
H1192 . C119 . H1193 . 109.9    no
C115 . C120 . H1201 . 108.9    no
C115 . C120 . H1202 . 110.0    no
H1201 . C120 . H1202 . 109.5    no
C115 . C120 . H1203 . 109.9    no
H1201 . C120 . H1203 . 108.9    no
H1202 . C120 . H1203 . 109.6    no
C116 . C121 . H1211 . 110.9    no
C116 . C121 . H1212 . 110.7    no
H1211 . C121 . H1212 . 107.2    no
C116 . C121 . H1213 . 110.4    no
H1211 . C121 . H1213 . 109.0    no
H1212 . C121 . H1213 . 108.4    no
C117 . C122 . H1221 . 108.4    no
C117 . C122 . H1222 . 110.0    no
H1221 . C122 . H1222 . 110.3    no
C117 . C122 . H1223 . 108.4    no
H1221 . C122 . H1223 . 110.2    no
H1222 . C122 . H1223 . 109.5    no
C118 . C123 . H1231 . 111.3    no
C118 . C123 . H1232 . 109.7    no
H1231 . C123 . H1232 . 109.2    no
C118 . C123 . H1233 . 108.8    no
H1231 . C123 . H1233 . 110.2    no
H1232 . C123 . H1233 . 107.6    no
N201 . C201 . N202 . 112.83(19)    yes
N201 . C201 . C202 . 123.9(2)    yes
N202 . C201 . C202 . 123.2(2)    yes
C201 . C202 . C203 . 120.6(2)    yes
C201 . C202 . C207 . 120.9(2)    yes
C203 . C202 . C207 . 118.5(2)    yes
C202 . C203 . C204 . 120.9(2)    yes
C202 . C203 . H2031 . 119.0    no
C204 . C203 . H2031 . 120.0    no
C203 . C204 . C205 . 119.7(2)    yes
C203 . C204 . H2041 . 119.9    no
C205 . C204 . H2041 . 120.4    no
C204 . C205 . C206 . 120.1(2)    yes
C204 . C205 . H2051 . 119.3    no
C206 . C205 . H2051 . 120.6    no
C205 . C206 . C207 . 119.8(2)    yes
C205 . C206 . H2061 . 120.1    no
C207 . C206 . H2061 . 120.1    no
C206 . C207 . C202 . 120.9(2)    yes
C206 . C207 . H2071 . 119.9    no
C202 . C207 . H2071 . 119.2    no
N201 . C208 . C209 . 113.4(2)    yes
N201 . C208 . C210 . 110.12(19)    yes
C209 . C208 . C210 . 109.4(2)    yes
N201 . C208 . H2081 . 107.9    no
C209 . C208 . H2081 . 107.3    no
C210 . C208 . H2081 . 108.6    no
C208 . C209 . H2091 . 108.3    no
C208 . C209 . H2092 . 111.3    no
H2091 . C209 . H2092 . 108.6    no
C208 . C209 . H2093 . 110.0    no
H2091 . C209 . H2093 . 108.6    no
H2092 . C209 . H2093 . 110.0    no
C208 . C210 . H2101 . 110.0    no
C208 . C210 . H2102 . 111.5    no
H2101 . C210 . H2102 . 108.8    no
C208 . C210 . H2103 . 109.2    no
H2101 . C210 . H2103 . 109.1    no
H2102 . C210 . H2103 . 108.3    no
N202 . C211 . C212 . 112.4(2)    yes
N202 . C211 . C213 . 110.5(2)    yes
C212 . C211 . C213 . 110.4(2)    yes
N202 . C211 . H2111 . 109.1    no
C212 . C211 . H2111 . 107.0    no
C213 . C211 . H2111 . 107.2    no
C211 . C212 . H2121 . 108.3    no
C211 . C212 . H2122 . 109.8    no
H2121 . C212 . H2122 . 109.7    no
C211 . C212 . H2123 . 110.3    no
H2121 . C212 . H2123 . 109.3    no
H2122 . C212 . H2123 . 109.4    no
C211 . C213 . H2131 . 109.2    no
C211 . C213 . H2132 . 110.3    no
H2131 . C213 . H2132 . 110.3    no
C211 . C213 . H2133 . 108.9    no
H2131 . C213 . H2133 . 108.7    no
H2132 . C213 . H2133 . 109.4    no
Ti4 . C214 . C215 . 72.61(13)    yes
Ti4 . C214 . C218 . 72.48(13)    yes
C215 . C214 . C218 . 108.1(2)    yes
Ti4 . C214 . C219 . 124.36(16)    yes
C215 . C214 . C219 . 125.4(2)    yes
C218 . C214 . C219 . 126.4(2)    yes
C214 . C215 . Ti4 . 74.53(13)    yes
C214 . C215 . C216 . 108.1(2)    yes
Ti4 . C215 . C216 . 69.77(13)    yes
C214 . C215 . C220 . 125.4(2)    yes
Ti4 . C215 . C220 . 129.05(16)    yes
C216 . C215 . C220 . 125.7(2)    yes
Ti4 . C216 . C215 . 76.76(13)    yes
Ti4 . C216 . C217 . 72.62(12)    yes
C215 . C216 . C217 . 107.9(2)    yes
Ti4 . C216 . C221 . 122.89(15)    yes
C215 . C216 . C221 . 126.3(2)    yes
C217 . C216 . C221 . 125.3(2)    yes
Ti4 . C217 . C216 . 72.82(13)    yes
Ti4 . C217 . C218 . 76.80(13)    yes
C216 . C217 . C218 . 108.1(2)    yes
Ti4 . C217 . C222 . 124.01(16)    yes
C216 . C217 . C222 . 124.9(2)    yes
C218 . C217 . C222 . 126.4(2)    yes
C214 . C218 . C217 . 107.8(2)    yes
C214 . C218 . Ti4 . 74.49(13)    yes
C217 . C218 . Ti4 . 69.70(12)    yes
C214 . C218 . C223 . 126.3(2)    yes
C217 . C218 . C223 . 125.1(2)    yes
Ti4 . C218 . C223 . 129.27(17)    yes
C214 . C219 . H2191 . 109.7    no
C214 . C219 . H2192 . 110.2    no
H2191 . C219 . H2192 . 108.5    no
C214 . C219 . H2193 . 110.7    no
H2191 . C219 . H2193 . 107.8    no
H2192 . C219 . H2193 . 109.8    no
C215 . C220 . H2201 . 108.8    no
C215 . C220 . H2202 . 110.2    no
H2201 . C220 . H2202 . 109.6    no
C215 . C220 . H2203 . 109.6    no
H2201 . C220 . H2203 . 109.8    no
H2202 . C220 . H2203 . 108.9    no
C216 . C221 . H2211 . 110.5    no
C216 . C221 . H2212 . 111.9    no
H2211 . C221 . H2212 . 109.1    no
C216 . C221 . H2213 . 109.5    no
H2211 . C221 . H2213 . 107.5    no
H2212 . C221 . H2213 . 108.3    no
C217 . C222 . H2221 . 110.0    no
C217 . C222 . H2222 . 110.4    no
H2221 . C222 . H2222 . 108.4    no
C217 . C222 . H2223 . 110.0    no
H2221 . C222 . H2223 . 108.4    no
H2222 . C222 . H2223 . 109.7    no
C218 . C223 . H2231 . 109.4    no
C218 . C223 . H2232 . 109.3    no
H2231 . C223 . H2232 . 109.9    no
C218 . C223 . H2233 . 108.9    no
H2231 . C223 . H2233 . 109.6    no
H2232 . C223 . H2233 . 109.6    no


#===end


data_compound_25c

# local code ADS350 


_chemical_name_systematic         
;
PhC(NOtBu)Ph
;

_chemical_melting_point           .

 
_exptl_special_details 
; 
 The crystal was 
placed in the cold stream of an Oxford 
Cryosystems open-flow nitrogen cryostat (Cosier & 
Glazer, 1986) with a nominal stability of 0.1K. 
 
Cosier, J. & Glazer, A.M., 1986. J. Appl. Cryst. 105-107. 
; 
_refine_special_details 
; 
The H atoms were all located in a difference map, but those 
attached to carbon atoms were repositioned geometrically. 
The H atoms were initially refined with soft restraints on the 
bond lengths and angles to regularise their geometry 
(C---H in the range 0.93--0.98) 
and 
U~iso~(H) (in the range 1.2-1.5 times U~eq~ of the parent atom), 
after which the positions were refined with riding constraints 
(Cooper et al, 2010). 
 
Cooper, R. I., Thompson, A. L. & Watkin, D. J. (2010). J. Appl. Cryst. 
43, 1100-1107. 


; 
_cell_length_a                    8.46178(11)
_cell_length_b                    10.87960(15)
_cell_length_c                    15.6091(2)
_cell_angle_alpha                 90
_cell_angle_beta                  90
_cell_angle_gamma                 90
_cell_volume                      1436.99(3)
 
_symmetry_cell_setting            'orthorhombic' 
_symmetry_space_group_name_H-M    'P 21 21 21 ' 
_symmetry_space_group_name_Hall   'P 2ac 2ab'
loop_
 _symmetry_equiv_pos_as_xyz
 'x,y,z'
 'x+1/2,-y+1/2,-z'
 '-x,y+1/2,-z+1/2'
 '-x+1/2,-y,z+1/2'

loop_
_atom_type_symbol
_atom_type_scat_dispersion_real
_atom_type_scat_dispersion_imag
_atom_type_scat_Cromer_Mann_a1
_atom_type_scat_Cromer_Mann_b1
_atom_type_scat_Cromer_Mann_a2
_atom_type_scat_Cromer_Mann_b2
_atom_type_scat_Cromer_Mann_a3
_atom_type_scat_Cromer_Mann_b3
_atom_type_scat_Cromer_Mann_a4
_atom_type_scat_Cromer_Mann_b4
_atom_type_scat_Cromer_Mann_c
_atom_type_scat_source  
 C       0.0181   0.0091   2.3100  20.8439   1.0200  10.2075   1.5886   0.5687
   0.8650  51.6512   0.2156 'International Tables Vol C 4.2.6.8 and 6.1.1.4'
 H       0.0000   0.0000   0.4930  10.5109   0.3229  26.1257   0.1402   3.1424
   0.0408  57.7998   0.0030 'International Tables Vol C 4.2.6.8 and 6.1.1.4'
 N       0.0311   0.0180  12.2126   0.0057   3.1322   9.8933   2.0125  28.9975
   1.1663   0.5826 -11.5290 'International Tables Vol C 4.2.6.8 and 6.1.1.4'
 O       0.0492   0.0322   3.0485  13.2771   2.2868   5.7011   1.5463   0.3239
   0.8670  32.9089   0.2508 'International Tables Vol C 4.2.6.8 and 6.1.1.4'
 
 
_cell_formula_units_Z                    4


_chemical_formula_sum             'C17 H19 N1 O1'
_chemical_formula_moiety          'C17 H19 N1 O1'
_chemical_compound_source                ?
_chemical_formula_weight            253.34
 
 
_cell_measurement_reflns_used         8409
_cell_measurement_theta_min              4
_cell_measurement_theta_max             77
_cell_measurement_temperature          150
 
_exptl_crystal_description        'block' 
_exptl_crystal_colour             'colourless' 
_exptl_crystal_size_min           0.200 
_exptl_crystal_size_mid           0.200 
_exptl_crystal_size_max           0.200 
 
_exptl_crystal_density_diffrn     1.171 
_exptl_crystal_density_meas       ? 
_exptl_crystal_density_method     'not measured' 
_exptl_crystal_F_000              544 
_exptl_absorpt_coefficient_mu     0.562 
 
_exptl_absorpt_correction_type    multi-scan 
_exptl_absorpt_process_details    'CrysAlis, (Oxford Diffraction, 2002)' 
_exptl_absorpt_correction_T_min   0.89 
_exptl_absorpt_correction_T_max   0.89 
_diffrn_measurement_device_type   'Oxford Diffraction SuperNova' 
_diffrn_measurement_device        'Area' 
_diffrn_radiation_monochromator   'graphite' 
_diffrn_radiation_type            'Cu K\a'
_diffrn_radiation_wavelength           1.54184
_diffrn_measurement_method        \w 
 

_computing_data_collection        'SuperNova, (Oxford Diffraction, 2010)' 
_computing_cell_refinement        'CrysAlis, (Oxford Diffraction, 2002)' 
_computing_data_reduction         'CrysAlis, (Oxford Diffraction, 2002)' 
_computing_structure_solution     'SIR92 (Altomare et al., 1994)' 
_computing_structure_refinement   'CRYSTALS (Betteridge et al., 2003)' 
_computing_publication_material   'CRYSTALS (Betteridge et al., 2003)' 
_computing_molecular_graphics     'CAMERON (Watkin et al., 1996)' 
 
_diffrn_standards_interval_time   . 
_diffrn_standards_interval_count  . 
_diffrn_standards_number          0 
_diffrn_standards_decay_%         ? 
 
_diffrn_ambient_temperature        150
_diffrn_reflns_number             13595 
_reflns_number_total              3008 
_diffrn_reflns_av_R_equivalents   0.025 

_diffrn_reflns_theta_min          4.955 
_diffrn_reflns_theta_max          76.760 
_diffrn_measured_fraction_theta_max 0.997 
 
_diffrn_reflns_theta_full         76.760 
_diffrn_measured_fraction_theta_full 0.997 
 
 
_diffrn_reflns_limit_h_min        -10 
_diffrn_reflns_limit_h_max        9 
_diffrn_reflns_limit_k_min        -9 
_diffrn_reflns_limit_k_max        13 
_diffrn_reflns_limit_l_min        -19 
_diffrn_reflns_limit_l_max        19 
_reflns_limit_h_min               -10 
_reflns_limit_h_max               10 
_reflns_limit_k_min               0 
_reflns_limit_k_max               13 
_reflns_limit_l_min               0 
_reflns_limit_l_max               19 
 
_oxford_diffrn_Wilson_B_factor    2.28 
_oxford_diffrn_Wilson_scale       0.01 
 
_atom_sites_solution_primary      direct 
_atom_sites_solution_secondary    difmap
_atom_sites_solution_hydrogens    difmap
 
_refine_diff_density_min          -0.25 
_refine_diff_density_max          0.16 
 
 
# The values actually used during refinement 
_oxford_reflns_threshold_expression_ref     I>0.0\s(I)
_refine_ls_number_reflns          2865 
_refine_ls_number_restraints      0 
_refine_ls_number_parameters      173 
_oxford_refine_ls_R_factor_ref    0.0298 
_refine_ls_wR_factor_ref          0.0322 
_refine_ls_goodness_of_fit_ref    0.9227 
_refine_ls_shift/su_max           0.0006012 
_refine_ls_shift/su_mean          0.0000599 
 
 
# The values computed with all filters except I/sigma 
_oxford_reflns_number_all         2996 
_refine_ls_R_factor_all           0.0310 
_refine_ls_wR_factor_all          0.0329 
 
# The values computed with a 2 sigma cutoff - a la SHELX 
_reflns_threshold_expression      I>2.0\s(I)
_reflns_number_gt                 2898 
_refine_ls_R_factor_gt            0.0301 
_refine_ls_wR_factor_gt           0.0323 
 
_refine_ls_abs_structure_Flack    0.16(16) 
_refine_ls_abs_structure_details  'Flack (1983), 1264 Friedel-pairs' 

_chemical_absolute_configuration  'ad' 
 
 
_refine_ls_structure_factor_coef  F 
_refine_ls_matrix_type            full
_refine_ls_hydrogen_treatment     constr        
                                                
_refine_ls_weighting_scheme       calc 
_refine_ls_weighting_details 
;
 Method, part 1, Chebychev polynomial, (Watkin, 1994, Prince, 1982) 
 [weight] = 1.0/[A~0~*T~0~(x)+A~1~*T~1~(x) ... +A~n-1~]*T~n-1~(x)] 
 where A~i~ are the Chebychev coefficients listed below and x= Fcalc/Fmax 
 Method = Robust Weighting (Prince, 1982) 
 W = [weight] * [1-(deltaF/6*sigmaF)^2^]^2^ 
 A~i~ are: 
 43.4 -29.0 55.1 -10.6 14.3 
;
_publ_section_references 
; 
Altomare, A., Cascarano, G., Giacovazzo, C., Guagliardi, A., Burla, M.C., 
Polidori, G. & Camalli, M. (1994). J. Appl. Cryst. 27, 435. 
 
Betteridge, P.W., Carruthers, J.R., Cooper, R.I., 
Prout, K. & Watkin, D.J. (2003). J. Appl. Cryst. 36, 1487. 
 
Flack, H. D. (1983). Acta Cryst. A39, 876-881. 
 
Oxford Diffraction, (2010). CrysAlisPro. 
 
Oxford Diffraction, (2010). Supernova User Manual. 
 
Prince, E. 
Mathematical Techniques in Crystallography 
and Materials Science 
Springer-Verlag, New York, 1982. 
 
Watkin D.J. (1994). 
Acta Cryst, A50, 411-437. 
 
Watkin, D.J., Prout, C.K. & Pearce, L.J. (1996). CAMERON, Chemical 
Crystallography Laboratory, Oxford, UK. 
; 

# Uequiv = arithmetic mean of Ui i.e. Ueqiv = (U1+U2+U3)/3


loop_
_atom_site_label
_atom_site_type_symbol
_atom_site_fract_x
_atom_site_fract_y
_atom_site_fract_z
_atom_site_U_iso_or_equiv
_atom_site_occupancy
_atom_site_adp_type
_atom_site_refinement_flags_posn
_atom_site_refinement_flags_adp
_atom_site_refinement_flags_occupancy
_atom_site_disorder_assembly
_atom_site_disorder_group
_atom_site_attached_hydrogens
C1 C -0.05192(11) 0.41560(8) 0.47824(6) 0.0261 1.0000 Uani . . . . . . 
C2 C -0.05652(15) 0.29265(10) 0.52452(7) 0.0365 1.0000 Uani . . . . . . 
C3 C -0.21539(12) 0.45461(11) 0.44877(7) 0.0348 1.0000 Uani . . . . . . 
C4 C 0.06470(13) 0.41561(11) 0.40431(6) 0.0353 1.0000 Uani . . . . . . 
C5 C 0.19058(10) 0.58864(8) 0.61485(6) 0.0215 1.0000 Uani . . . . . . 
C6 C 0.09680(10) 0.70132(8) 0.63417(6) 0.0215 1.0000 Uani . . . . . . 
C7 C 0.02435(12) 0.76857(9) 0.56919(6) 0.0272 1.0000 Uani . . . . . . 
C8 C -0.06021(13) 0.87476(9) 0.58826(7) 0.0310 1.0000 Uani . . . . . . 
C9 C -0.07527(12) 0.91319(9) 0.67254(7) 0.0303 1.0000 Uani . . . . . . 
C10 C -0.00346(13) 0.84731(9) 0.73764(6) 0.0302 1.0000 Uani . . . . . . 
C11 C 0.08309(12) 0.74236(9) 0.71871(6) 0.0261 1.0000 Uani . . . . . . 
C12 C 0.35507(11) 0.57787(8) 0.64784(5) 0.0223 1.0000 Uani . . . . . . 
C13 C 0.44799(12) 0.68254(9) 0.65816(6) 0.0263 1.0000 Uani . . . . . . 
C14 C 0.60594(12) 0.67241(10) 0.68221(7) 0.0320 1.0000 Uani . . . . . . 
C15 C 0.67165(12) 0.55786(11) 0.69719(7) 0.0344 1.0000 Uani . . . . . . 
C16 C 0.57925(13) 0.45330(10) 0.68898(7) 0.0329 1.0000 Uani . . . . . . 
C17 C 0.42183(12) 0.46247(9) 0.66458(6) 0.0272 1.0000 Uani . . . . . . 
N1 N 0.14439(9) 0.49784(7) 0.56811(5) 0.0236 1.0000 Uani . . . . . . 
O1 O -0.01082(7) 0.51261(6) 0.53920(5) 0.0274 1.0000 Uani . . . . . . 
H21 H 0.0485 0.2721 0.5504 0.0551 1.0000 Uiso R . . . . . 
H23 H -0.0865 0.2244 0.4836 0.0542 1.0000 Uiso R . . . . . 
H22 H -0.1326 0.2953 0.5731 0.0547 1.0000 Uiso R . . . . . 
H32 H -0.2103 0.5369 0.4233 0.0529 1.0000 Uiso R . . . . . 
H31 H -0.2556 0.3944 0.4059 0.0522 1.0000 Uiso R . . . . . 
H33 H -0.2911 0.4589 0.4978 0.0519 1.0000 Uiso R . . . . . 
H42 H 0.0637 0.5001 0.3790 0.0503 1.0000 Uiso R . . . . . 
H43 H 0.0280 0.3561 0.3603 0.0500 1.0000 Uiso R . . . . . 
H41 H 0.1712 0.3939 0.4226 0.0496 1.0000 Uiso R . . . . . 
H71 H 0.0337 0.7418 0.5082 0.0319 1.0000 Uiso R . . . . . 
H81 H -0.1081 0.9226 0.5403 0.0371 1.0000 Uiso R . . . . . 
H91 H -0.1373 0.9875 0.6857 0.0360 1.0000 Uiso R . . . . . 
H101 H -0.0124 0.8755 0.7991 0.0364 1.0000 Uiso R . . . . . 
H111 H 0.1337 0.6952 0.7638 0.0293 1.0000 Uiso R . . . . . 
H131 H 0.4025 0.7651 0.6469 0.0318 1.0000 Uiso R . . . . . 
H141 H 0.6676 0.7481 0.6892 0.0387 1.0000 Uiso R . . . . . 
H151 H 0.7841 0.5500 0.7129 0.0415 1.0000 Uiso R . . . . . 
H161 H 0.6228 0.3710 0.7002 0.0367 1.0000 Uiso R . . . . . 
H171 H 0.3570 0.3891 0.6593 0.0315 1.0000 Uiso R . . . . . 
loop_
_atom_site_aniso_label
_atom_site_aniso_U_11
_atom_site_aniso_U_22
_atom_site_aniso_U_33
_atom_site_aniso_U_23
_atom_site_aniso_U_13
_atom_site_aniso_U_12
C1 0.0283(5) 0.0243(4) 0.0258(4) -0.0044(4) -0.0038(4) -0.0040(4) 
C2 0.0484(6) 0.0252(5) 0.0360(5) -0.0016(4) -0.0093(5) -0.0074(4) 
C3 0.0273(5) 0.0385(5) 0.0385(6) -0.0010(5) -0.0062(4) -0.0050(4) 
C4 0.0311(5) 0.0466(6) 0.0281(5) -0.0044(4) -0.0014(4) 0.0002(5) 
C5 0.0239(4) 0.0208(4) 0.0197(4) 0.0009(3) 0.0014(3) -0.0018(3) 
C6 0.0210(4) 0.0201(4) 0.0235(4) -0.0012(3) -0.0003(3) -0.0040(3) 
C7 0.0314(5) 0.0255(4) 0.0246(4) -0.0008(4) -0.0035(4) -0.0006(4) 
C8 0.0323(5) 0.0256(4) 0.0352(5) 0.0017(4) -0.0093(4) 0.0010(4) 
C9 0.0254(4) 0.0239(4) 0.0415(5) -0.0054(4) -0.0031(4) 0.0030(4) 
C10 0.0321(5) 0.0297(5) 0.0289(5) -0.0059(4) 0.0005(4) 0.0012(4) 
C11 0.0301(5) 0.0254(4) 0.0228(4) -0.0009(3) -0.0021(4) 0.0008(4) 
C12 0.0238(4) 0.0254(4) 0.0178(4) -0.0004(3) 0.0010(3) -0.0006(4) 
C13 0.0276(5) 0.0271(5) 0.0241(4) 0.0011(4) -0.0005(4) -0.0032(4) 
C14 0.0265(5) 0.0396(5) 0.0297(5) 0.0000(4) -0.0013(4) -0.0084(4) 
C15 0.0232(4) 0.0500(6) 0.0299(5) -0.0010(4) -0.0007(4) 0.0014(4) 
C16 0.0317(5) 0.0365(5) 0.0305(5) 0.0000(4) -0.0004(4) 0.0096(4) 
C17 0.0298(5) 0.0260(4) 0.0257(4) -0.0016(3) -0.0003(4) 0.0007(4) 
N1 0.0211(4) 0.0241(3) 0.0257(4) -0.0024(3) -0.0015(3) -0.0011(3) 
O1 0.0213(3) 0.0248(3) 0.0361(3) -0.0091(3) -0.0044(3) -0.0006(2) 

_refine_ls_extinction_method 
    'None'
_oxford_refine_ls_scale 10.779(17) 
loop_
 _geom_bond_atom_site_label_1
 _geom_bond_site_symmetry_1
 _geom_bond_atom_site_label_2
 _geom_bond_site_symmetry_2
 _geom_bond_distance
 _geom_bond_publ_flag
C1 . C2 . 1.5207(13)    yes
C1 . C3 . 1.5182(14)    yes
C1 . C4 . 1.5183(14)    yes
C1 . O1 . 1.4631(11)    yes
C2 . H21 . 1.002    no
C2 . H23 . 1.012    no
C2 . H22 . 0.996    no
C3 . H32 . 0.980    no
C3 . H31 . 0.996    no
C3 . H33 . 0.999    no
C4 . H42 . 1.001    no
C4 . H43 . 0.993    no
C4 . H41 . 0.974    no
C5 . C6 . 1.4910(12)    yes
C5 . C12 . 1.4886(12)    yes
C5 . N1 . 1.2888(12)    yes
C6 . C7 . 1.3928(13)    yes
C6 . C11 . 1.3980(13)    yes
C7 . C8 . 1.3911(14)    yes
C7 . H71 . 0.998    no
C8 . C9 . 1.3862(15)    yes
C8 . H81 . 0.998    no
C9 . C10 . 1.3840(15)    yes
C9 . H91 . 0.986    no
C10 . C11 . 1.3883(14)    yes
C10 . H101 . 1.010    no
C11 . H111 . 0.971    no
C12 . C13 . 1.3932(13)    yes
C12 . C17 . 1.4013(13)    yes
C13 . C14 . 1.3926(14)    yes
C13 . H131 . 0.993    no
C14 . C15 . 1.3845(16)    yes
C14 . H141 . 0.980    no
C15 . C16 . 1.3863(17)    yes
C15 . H151 . 0.986    no
C16 . C17 . 1.3890(15)    yes
C16 . H161 . 0.984    no
C17 . H171 . 0.972    no
N1 . O1 . 1.3980(9)    yes
loop_
 _geom_angle_atom_site_label_1
 _geom_angle_site_symmetry_1
 _geom_angle_atom_site_label_2
 _geom_angle_site_symmetry_2
 _geom_angle_atom_site_label_3
 _geom_angle_site_symmetry_3
 _geom_angle
 _geom_angle_publ_flag
C2 . C1 . C3 . 111.50(9)    yes
C2 . C1 . C4 . 112.19(9)    yes
C3 . C1 . C4 . 111.22(8)    yes
C2 . C1 . O1 . 109.37(8)    yes
C3 . C1 . O1 . 102.23(7)    yes
C4 . C1 . O1 . 109.86(8)    yes
C1 . C2 . H21 . 111.4    no
C1 . C2 . H23 . 110.6    no
H21 . C2 . H23 . 108.3    no
C1 . C2 . H22 . 110.7    no
H21 . C2 . H22 . 105.8    no
H23 . C2 . H22 . 109.9    no
C1 . C3 . H32 . 109.8    no
C1 . C3 . H31 . 109.3    no
H32 . C3 . H31 . 110.0    no
C1 . C3 . H33 . 111.5    no
H32 . C3 . H33 . 107.2    no
H31 . C3 . H33 . 109.0    no
C1 . C4 . H42 . 107.2    no
C1 . C4 . H43 . 108.8    no
H42 . C4 . H43 . 108.8    no
C1 . C4 . H41 . 112.2    no
H42 . C4 . H41 . 110.3    no
H43 . C4 . H41 . 109.5    no
C6 . C5 . C12 . 119.50(8)    yes
C6 . C5 . N1 . 125.68(8)    yes
C12 . C5 . N1 . 114.77(8)    yes
C5 . C6 . C7 . 121.26(8)    yes
C5 . C6 . C11 . 119.84(8)    yes
C7 . C6 . C11 . 118.88(8)    yes
C6 . C7 . C8 . 120.45(9)    yes
C6 . C7 . H71 . 120.4    no
C8 . C7 . H71 . 119.1    no
C7 . C8 . C9 . 120.05(9)    yes
C7 . C8 . H81 . 118.8    no
C9 . C8 . H81 . 121.2    no
C8 . C9 . C10 . 120.01(9)    yes
C8 . C9 . H91 . 119.6    no
C10 . C9 . H91 . 120.4    no
C9 . C10 . C11 . 120.09(9)    yes
C9 . C10 . H101 . 120.5    no
C11 . C10 . H101 . 119.4    no
C6 . C11 . C10 . 120.49(9)    yes
C6 . C11 . H111 . 118.6    no
C10 . C11 . H111 . 120.9    no
C5 . C12 . C13 . 120.22(8)    yes
C5 . C12 . C17 . 120.80(8)    yes
C13 . C12 . C17 . 118.89(8)    yes
C12 . C13 . C14 . 120.54(9)    yes
C12 . C13 . H131 . 120.0    no
C14 . C13 . H131 . 119.4    no
C13 . C14 . C15 . 120.14(10)    yes
C13 . C14 . H141 . 118.3    no
C15 . C14 . H141 . 121.6    no
C14 . C15 . C16 . 119.77(9)    yes
C14 . C15 . H151 . 120.5    no
C16 . C15 . H151 . 119.7    no
C15 . C16 . C17 . 120.48(10)    yes
C15 . C16 . H161 . 121.2    no
C17 . C16 . H161 . 118.3    no
C12 . C17 . C16 . 120.14(9)    yes
C12 . C17 . H171 . 119.5    no
C16 . C17 . H171 . 120.4    no
C5 . N1 . O1 . 112.30(7)    yes
C1 . O1 . N1 . 110.50(7)    yes


#===end


data_compound_26

# local code ADS181 
 
_chemical_name_systematic         
;
C5Me5Ti{PhC(NiPr)2}{NC(ArF)N(OtBu)}
;
_chemical_melting_point           ?


_refine_special_details 
; 
The Cp* carbons showed evidence of positional disorder. However, a satisfactory
split-site model could not be developed and therefore the ADPs were controlled
through the use of soft similarity restraints.

The H atoms were all located in a difference map and repositioned 
geometrically. They were initially refined with soft restraints on the 
bond lengths and angles to regularise their geometry, 
after which the positions were refined with riding constraints 
; 

_cell_length_a                    10.6906(10)
_cell_length_b                    11.8098(11)
_cell_length_c                    13.8987(15)
_cell_angle_alpha                 96.244(4)
_cell_angle_beta                  93.745(4)
_cell_angle_gamma                 98.297(5)
_cell_volume                      1720.2(3)
 
_symmetry_cell_setting            'Triclinic' 
_symmetry_space_group_name_H-M    'P -1 ' 
_symmetry_space_group_name_Hall   ? 
loop_
 _symmetry_equiv_pos_as_xyz
 'x,y,z'
 '-x,-y,-z'

loop_
_atom_type_symbol
_atom_type_scat_dispersion_real
_atom_type_scat_dispersion_imag
_atom_type_scat_Cromer_Mann_a1
_atom_type_scat_Cromer_Mann_b1
_atom_type_scat_Cromer_Mann_a2
_atom_type_scat_Cromer_Mann_b2
_atom_type_scat_Cromer_Mann_a3
_atom_type_scat_Cromer_Mann_b3
_atom_type_scat_Cromer_Mann_a4
_atom_type_scat_Cromer_Mann_b4
_atom_type_scat_Cromer_Mann_c
_atom_type_scat_source  
 C       0.0033   0.0016   2.3100  20.8439   1.0200  10.2075   1.5886   0.5687
   0.8650  51.6512   0.2156 'International Tables Vol C 4.2.6.8 and 6.1.1.4'
 H       0.0000   0.0000   0.4930  10.5109   0.3229  26.1257   0.1402   3.1424
   0.0408  57.7998   0.0030 'International Tables Vol C 4.2.6.8 and 6.1.1.4'
 N       0.0061   0.0033  12.2126   0.0057   3.1322   9.8933   2.0125  28.9975
   1.1663   0.5826 -11.5290 'International Tables Vol C 4.2.6.8 and 6.1.1.4'
 O       0.0106   0.0060   3.0485  13.2771   2.2868   5.7011   1.5463   0.3239
   0.8670  32.9089   0.2508 'International Tables Vol C 4.2.6.8 and 6.1.1.4'
 Ti      0.2776   0.4457   9.7595   7.8508   7.3558   0.5000   1.6991  35.6338
   1.9021 116.1050   1.2807 'International Tables Vol C 4.2.6.8 and 6.1.1.4'
 F       0.0171   0.0103   3.5392  10.2825   2.6412   4.2944   1.5170   0.2615
   1.0243  26.1476   0.2776 'International Tables Vol C 4.2.6.8 and 6.1.1.4'
 
 
_cell_formula_units_Z                    2


_chemical_formula_sum             'C34 H43 F5 N4 O1 Ti1'
_chemical_formula_moiety          'C34 H43 F5 N4 O1 Ti1'
_chemical_compound_source                ?
_chemical_formula_weight            666.63
 
 
_cell_measurement_reflns_used         4011
_cell_measurement_theta_min              5
_cell_measurement_theta_max             25
_cell_measurement_temperature          150
 
_exptl_crystal_description        'block' 
_exptl_crystal_colour             'green' 
_exptl_crystal_size_min           0.300 
_exptl_crystal_size_mid           0.300 
_exptl_crystal_size_max           0.400 
 
_exptl_crystal_density_diffrn     1.287 
_exptl_crystal_density_meas       ? 
_exptl_crystal_density_method     'not measured' 
_exptl_crystal_F_000              700 
_exptl_absorpt_coefficient_mu     0.308 
 
_exptl_absorpt_correction_type    multi-scan 
_exptl_absorpt_process_details    'DENZO/SCALEPACK (Otwinowski & Minor, 1997)' 
_exptl_absorpt_correction_T_min   0.91 
_exptl_absorpt_correction_T_max   0.91 
_diffrn_measurement_device_type   'Nonius KappaCCD' 
_diffrn_measurement_device        'Area' 
_diffrn_radiation_monochromator   'graphite' 
_diffrn_radiation_type            'Mo K\a'
_diffrn_radiation_wavelength           0.71073
_diffrn_measurement_method        \w 
 
_computing_data_collection        'COLLECT (Nonius, 2001).' 
_computing_cell_refinement        'DENZO/SCALEPACK (Otwinowski & Minor, 1997)' 
_computing_data_reduction         'DENZO/SCALEPACK (Otwinowski & Minor, 1997)' 
_computing_structure_solution     'SIR92 (Altomare et al., 1994)' 
_computing_structure_refinement   'CRYSTALS (Betteridge et al., 2003)' 
_computing_publication_material   'CRYSTALS (Betteridge et al., 2003)' 
_computing_molecular_graphics     'CAMERON (Watkin et al., 1996)' 
 
_diffrn_standards_interval_time   . 
_diffrn_standards_interval_count  . 
_diffrn_standards_number          0 
_diffrn_standards_decay_%         ? 
 
_diffrn_ambient_temperature        150
_diffrn_reflns_number             12027 
_reflns_number_total              5599 
_diffrn_reflns_av_R_equivalents   0.037 
 
 
_diffrn_reflns_theta_min          5.097 
_diffrn_reflns_theta_max          24.931 
_diffrn_measured_fraction_theta_max 0.982 
 
_diffrn_reflns_theta_full         25.699 
_diffrn_measured_fraction_theta_full 0.985 
 
 
_diffrn_reflns_limit_h_min        -12 
_diffrn_reflns_limit_h_max        12 
_diffrn_reflns_limit_k_min        -13 
_diffrn_reflns_limit_k_max        13 
_diffrn_reflns_limit_l_min        -16 
_diffrn_reflns_limit_l_max        16 
_reflns_limit_h_min               -12 
_reflns_limit_h_max               12 
_reflns_limit_k_min               -13 
_reflns_limit_k_max               13 
_reflns_limit_l_min               0 
_reflns_limit_l_max               16 
 
_oxford_diffrn_Wilson_B_factor    3.09 
_oxford_diffrn_Wilson_scale       0.86 
 
_atom_sites_solution_primary      Direct 
_atom_sites_solution_secondary  difmap
_atom_sites_solution_hydrogens    difmap
 
_refine_diff_density_min          -0.75 
_refine_diff_density_max          0.67 
 
 
# The current dictionary definitions do not cover the 
# situation where the reflections used for refinement were 
# selected by a user-defined sigma threshold 
 
 
# The values actually used during refinement 
_oxford_reflns_threshold_expression_ref     I>2.0\s(I)
_refine_ls_number_reflns          4061 
_refine_ls_number_restraints      60 
_refine_ls_number_parameters      406 
_oxford_refine_ls_R_factor_ref    0.0836 
_refine_ls_wR_factor_ref          0.0732 
_refine_ls_goodness_of_fit_ref    1.1125 
_refine_ls_shift/su_max           0.0028409 
_refine_ls_shift/su_mean          0.0000699 
 
 
# The values computed from all data 
_oxford_reflns_number_all         5599 
_refine_ls_R_factor_all           0.1191 
_refine_ls_wR_factor_all          0.1024 
 
# The values computed with a 2 sigma cutoff - a la SHELX 
_reflns_threshold_expression      I>2.0\s(I)
_reflns_number_gt                 4061 
_refine_ls_R_factor_gt            0.0836 
_refine_ls_wR_factor_gt           0.0732 
 
_chemical_absolute_configuration  '.' 
 
 
_refine_ls_structure_factor_coef  F 
_refine_ls_matrix_type            full
_refine_ls_hydrogen_treatment     constr        
_refine_ls_weighting_scheme       calc 
_refine_ls_weighting_details 
;
 Method, part 1, Chebychev polynomial, (Watkin, 1994, Prince, 1982) 
 [weight] = 1.0/[A~0~*T~0~(x)+A~1~*T~1~(x) ... +A~n-1~]*T~n-1~(x)] 
 where A~i~ are the Chebychev coefficients listed below and x= Fcalc/Fmax 
 Method = Robust Weighting (Prince, 1982) 
 W = [weight] * [1-(deltaF/6*sigmaF)^2^]^2^ 
 A~i~ are: 
 3.77 0.971 3.08 0.608 0.151 
;
_publ_section_references 
; 
Nonius (2001). COLLECT. Nonius BV, Delft, The Netherlands. 
 
Otwinowski, Z. & Minor, W. (1997). Methods in Enzymology, Vol. 276, 
edited by C. W. Carter Jr & R. M. Sweet, pp. 307--326. 
New York: Academic Press. 
 
Betteridge, P.W., Carruthers, J.R., Cooper, R.I., 
Prout, K. & Watkin, D.J. (2003). J. Appl. Cryst. 36, 1487. 
 
Watkin, D.J., Prout, C.K. & Pearce, L.J. (1996). CAMERON, Chemical 
Crystallography Laboratory, Oxford, UK. 
 
Altomare, A., Cascarano, G., Giacovazzo, C., Guagliardi, A., Burla, M.C., 
Polidori, G. & Camalli, M. (1994). J. Appl. Cryst. 27, 435. 
 
Watkin D.J. (1994). 
Acta Cryst, A50, 411-437. 
 
Prince, E. 
Mathematical Techniques in Crystallography 
and Materials Science 
Springer-Verlag, New York, 1982. 
; 

# Uequiv = arithmetic mean of Ui i.e. Ueqiv = (U1+U2+U3)/3


loop_
_atom_site_label
_atom_site_type_symbol
_atom_site_fract_x
_atom_site_fract_y
_atom_site_fract_z
_atom_site_U_iso_or_equiv
_atom_site_occupancy
_atom_site_adp_type
_atom_site_refinement_flags_posn
_atom_site_refinement_flags_adp
_atom_site_refinement_flags_occupancy
_atom_site_disorder_assembly
_atom_site_disorder_group
_atom_site_attached_hydrogens
Ti1 Ti 0.25322(8) 0.75586(7) 0.31523(6) 0.0390 1.0000 Uani . . . . . . 
N1 N 0.2793(4) 0.6264(3) 0.2519(3) 0.0449 1.0000 Uani . . . . . . 
N2 N 0.4263(4) 0.5099(3) 0.2052(3) 0.0499 1.0000 Uani . . . . . . 
N3 N 0.0578(3) 0.7453(3) 0.3191(3) 0.0397 1.0000 Uani . . . . . . 
N4 N 0.1668(3) 0.8472(3) 0.2176(3) 0.0378 1.0000 Uani . . . . . . 
O1 O 0.4334(3) 0.3911(3) 0.1784(3) 0.0498 1.0000 Uani . . . . . . 
F1 F 0.2833(3) 0.3414(3) 0.3458(2) 0.0609 1.0000 Uani . . . . . . 
F2 F 0.0757(3) 0.1786(3) 0.3306(2) 0.0636 1.0000 Uani . . . . . . 
F3 F -0.1138(3) 0.1765(2) 0.1929(2) 0.0616 1.0000 Uani . . . . . . 
F4 F -0.0945(3) 0.3354(2) 0.0652(2) 0.0599 1.0000 Uani . . . . . . 
F5 F 0.1117(3) 0.4974(2) 0.07808(19) 0.0506 1.0000 Uani . . . . . . 
C1 C 0.3122(4) 0.5217(4) 0.2223(3) 0.0398 1.0000 Uani . . . . . . 
C2 C 0.2035(4) 0.4239(4) 0.2121(3) 0.0370 1.0000 Uani . . . . . . 
C3 C 0.1914(4) 0.3416(4) 0.2746(3) 0.0423 1.0000 Uani . . . . . . 
C4 C 0.0858(5) 0.2582(4) 0.2696(3) 0.0438 1.0000 Uani . . . . . . 
C5 C -0.0107(4) 0.2570(4) 0.1985(4) 0.0426 1.0000 Uani . . . . . . 
C6 C 0.0001(4) 0.3365(4) 0.1346(3) 0.0415 1.0000 Uani . . . . . . 
C7 C 0.1053(4) 0.4199(3) 0.1415(3) 0.0366 1.0000 Uani . . . . . . 
C8 C 0.5638(4) 0.3749(4) 0.1644(4) 0.0473 1.0000 Uani . . . . . . 
C9 C 0.6530(6) 0.4372(6) 0.2484(5) 0.0745 1.0000 Uani . . . . . . 
C10 C 0.5969(6) 0.4152(6) 0.0703(5) 0.0692 1.0000 Uani . . . . . . 
C11 C 0.5578(5) 0.2461(5) 0.1601(4) 0.0610 1.0000 Uani . . . . . . 
C12 C 0.0539(4) 0.8007(3) 0.2410(3) 0.0383 1.0000 Uani . . . . . . 
C13 C -0.0673(4) 0.8078(4) 0.1834(3) 0.0403 1.0000 Uani . . . . . . 
C14 C -0.1190(5) 0.7210(4) 0.1090(3) 0.0494 1.0000 Uani . . . . . . 
C15 C -0.2327(5) 0.7301(5) 0.0582(4) 0.0558 1.0000 Uani . . . . . . 
C16 C -0.2929(5) 0.8240(5) 0.0787(4) 0.0565 1.0000 Uani . . . . . . 
C17 C -0.2405(5) 0.9105(4) 0.1515(4) 0.0525 1.0000 Uani . . . . . . 
C18 C -0.1280(5) 0.9026(4) 0.2027(3) 0.0461 1.0000 Uani . . . . . . 
C19 C -0.0548(5) 0.6749(4) 0.3478(3) 0.0469 1.0000 Uani . . . . . . 
C20 C -0.0224(6) 0.5601(4) 0.3716(4) 0.0639 1.0000 Uani . . . . . . 
C21 C -0.1111(6) 0.7347(6) 0.4321(6) 0.0859 1.0000 Uani . . . . . . 
C22 C 0.1837(5) 0.8926(4) 0.1238(3) 0.0447 1.0000 Uani . . . . . . 
C23 C 0.1744(6) 1.0206(5) 0.1314(4) 0.0629 1.0000 Uani . . . . . . 
C24 C 0.3074(6) 0.8684(5) 0.0887(4) 0.0662 1.0000 Uani . . . . . . 
C25 C 0.3030(5) 0.7957(4) 0.4864(3) 0.0506 1.0000 Uani . U . . . . 
C26 C 0.3004(6) 0.9033(4) 0.4519(4) 0.0652 1.0000 Uani . U . . . . 
C27 C 0.3971(7) 0.9196(5) 0.3897(4) 0.0767 1.0000 Uani . U . . . . 
C28 C 0.4586(5) 0.8213(6) 0.3837(4) 0.0684 1.0000 Uani . U . . . . 
C29 C 0.4030(5) 0.7450(4) 0.4445(4) 0.0526 1.0000 Uani . U . . . . 
C30 C 0.2252(6) 0.7482(6) 0.5622(4) 0.0737 1.0000 Uani . U . . . . 
C31 C 0.2080(7) 0.9843(6) 0.4809(5) 0.0904 1.0000 Uani . U . . . . 
C32 C 0.4289(8) 1.0292(6) 0.3447(5) 0.1046 1.0000 Uani . U . . . . 
C33 C 0.5689(6) 0.8005(8) 0.3239(5) 0.0981 1.0000 Uani . U . . . . 
C34 C 0.4412(6) 0.6322(5) 0.4655(5) 0.0722 1.0000 Uani . U . . . . 
H91 H 0.7369 0.4165 0.2425 0.1105 1.0000 Uiso R . . . . . 
H92 H 0.6560 0.5193 0.2488 0.1109 1.0000 Uiso R . . . . . 
H93 H 0.6220 0.4135 0.3073 0.1111 1.0000 Uiso R . . . . . 
H101 H 0.6813 0.4001 0.0566 0.1039 1.0000 Uiso R . . . . . 
H102 H 0.5950 0.4972 0.0754 0.1039 1.0000 Uiso R . . . . . 
H103 H 0.5348 0.3754 0.0192 0.1041 1.0000 Uiso R . . . . . 
H111 H 0.6399 0.2242 0.1489 0.0906 1.0000 Uiso R . . . . . 
H112 H 0.5338 0.2221 0.2206 0.0910 1.0000 Uiso R . . . . . 
H113 H 0.4966 0.2069 0.1089 0.0911 1.0000 Uiso R . . . . . 
H141 H -0.0767 0.6576 0.0941 0.0587 1.0000 Uiso R . . . . . 
H151 H -0.2686 0.6715 0.0098 0.0670 1.0000 Uiso R . . . . . 
H161 H -0.3698 0.8290 0.0442 0.0678 1.0000 Uiso R . . . . . 
H171 H -0.2815 0.9737 0.1650 0.0626 1.0000 Uiso R . . . . . 
H181 H -0.0913 0.9621 0.2506 0.0547 1.0000 Uiso R . . . . . 
H191 H -0.1188 0.6599 0.2928 0.0563 1.0000 Uiso R . . . . . 
H201 H -0.0962 0.5123 0.3882 0.0945 1.0000 Uiso R . . . . . 
H202 H 0.0413 0.5708 0.4251 0.0949 1.0000 Uiso R . . . . . 
H203 H 0.0088 0.5216 0.3160 0.0947 1.0000 Uiso R . . . . . 
H211 H -0.1878 0.6885 0.4468 0.1278 1.0000 Uiso R . . . . . 
H212 H -0.1300 0.8088 0.4184 0.1281 1.0000 Uiso R . . . . . 
H213 H -0.0511 0.7457 0.4877 0.1280 1.0000 Uiso R . . . . . 
H221 H 0.1162 0.8515 0.0768 0.0539 1.0000 Uiso R . . . . . 
H231 H 0.1837 1.0478 0.0694 0.0938 1.0000 Uiso R . . . . . 
H232 H 0.2396 1.0637 0.1783 0.0934 1.0000 Uiso R . . . . . 
H233 H 0.0921 1.0320 0.1518 0.0935 1.0000 Uiso R . . . . . 
H241 H 0.3164 0.8921 0.0250 0.0975 1.0000 Uiso R . . . . . 
H242 H 0.3749 0.9114 0.1328 0.0976 1.0000 Uiso R . . . . . 
H243 H 0.3118 0.7877 0.0872 0.0978 1.0000 Uiso R . . . . . 
H301 H 0.2251 0.6673 0.5598 0.1109 1.0000 Uiso R . . . . . 
H302 H 0.2615 0.7855 0.6245 0.1111 1.0000 Uiso R . . . . . 
H303 H 0.1394 0.7632 0.5524 0.1111 1.0000 Uiso R . . . . . 
H311 H 0.2299 1.0527 0.4497 0.1349 1.0000 Uiso R . . . . . 
H312 H 0.2153 1.0045 0.5504 0.1353 1.0000 Uiso R . . . . . 
H313 H 0.1225 0.9489 0.4599 0.1348 1.0000 Uiso R . . . . . 
H321 H 0.4893 1.0157 0.2979 0.1567 1.0000 Uiso R . . . . . 
H322 H 0.4661 1.0901 0.3949 0.1572 1.0000 Uiso R . . . . . 
H323 H 0.3518 1.0483 0.3141 0.1568 1.0000 Uiso R . . . . . 
H331 H 0.5902 0.7253 0.3330 0.1466 1.0000 Uiso R . . . . . 
H332 H 0.6404 0.8599 0.3460 0.1471 1.0000 Uiso R . . . . . 
H333 H 0.5461 0.8040 0.2561 0.1471 1.0000 Uiso R . . . . . 
H341 H 0.4863 0.6053 0.4131 0.1080 1.0000 Uiso R . . . . . 
H342 H 0.4957 0.6421 0.5238 0.1081 1.0000 Uiso R . . . . . 
H343 H 0.3678 0.5778 0.4699 0.1080 1.0000 Uiso R . . . . . 
loop_
_atom_site_aniso_label
_atom_site_aniso_U_11
_atom_site_aniso_U_22
_atom_site_aniso_U_33
_atom_site_aniso_U_23
_atom_site_aniso_U_13
_atom_site_aniso_U_12
Ti1 0.0425(5) 0.0293(4) 0.0399(5) -0.0021(3) -0.0080(3) -0.0025(3) 
N1 0.045(2) 0.035(2) 0.049(2) -0.0049(17) -0.0084(18) 0.0002(16) 
N2 0.044(2) 0.040(2) 0.059(2) -0.0053(18) -0.0062(19) 0.0004(17) 
N3 0.044(2) 0.0316(18) 0.040(2) 0.0004(16) -0.0031(16) 0.0005(15) 
N4 0.044(2) 0.0276(17) 0.038(2) -0.0010(15) -0.0016(16) -0.0002(15) 
O1 0.0392(18) 0.0400(17) 0.066(2) -0.0074(15) 0.0012(15) 0.0055(13) 
F1 0.0650(18) 0.0623(18) 0.0522(17) 0.0131(14) -0.0176(14) 0.0040(14) 
F2 0.082(2) 0.0518(17) 0.0568(18) 0.0142(14) 0.0073(15) 0.0025(15) 
F3 0.0502(16) 0.0409(15) 0.087(2) -0.0013(14) 0.0049(15) -0.0080(12) 
F4 0.0521(17) 0.0545(17) 0.0659(18) -0.0009(14) -0.0247(14) 0.0027(13) 
F5 0.0587(17) 0.0406(14) 0.0495(15) 0.0076(12) -0.0129(13) 0.0041(12) 
C1 0.038(3) 0.035(2) 0.042(2) 0.0001(19) -0.008(2) 0.0000(18) 
C2 0.038(2) 0.032(2) 0.039(2) -0.0056(18) -0.0033(19) 0.0078(17) 
C3 0.044(3) 0.040(2) 0.040(2) -0.002(2) -0.009(2) 0.005(2) 
C4 0.051(3) 0.038(2) 0.045(3) 0.008(2) 0.007(2) 0.011(2) 
C5 0.035(2) 0.031(2) 0.058(3) -0.004(2) 0.008(2) -0.0003(18) 
C6 0.031(2) 0.038(2) 0.051(3) -0.007(2) -0.007(2) 0.0034(18) 
C7 0.040(2) 0.031(2) 0.039(2) -0.0026(18) 0.0012(19) 0.0100(18) 
C8 0.035(2) 0.050(3) 0.057(3) 0.007(2) -0.002(2) 0.009(2) 
C9 0.061(4) 0.084(4) 0.072(4) -0.009(3) -0.023(3) 0.014(3) 
C10 0.058(3) 0.079(4) 0.076(4) 0.021(3) 0.011(3) 0.017(3) 
C11 0.052(3) 0.059(3) 0.073(4) 0.005(3) -0.002(3) 0.018(2) 
C12 0.041(2) 0.029(2) 0.040(2) -0.0070(19) -0.0044(19) 0.0018(18) 
C13 0.046(3) 0.035(2) 0.039(2) 0.0039(19) 0.002(2) 0.0046(19) 
C14 0.054(3) 0.045(3) 0.044(3) -0.003(2) -0.004(2) -0.003(2) 
C15 0.053(3) 0.063(3) 0.043(3) 0.003(2) -0.008(2) -0.010(3) 
C16 0.046(3) 0.072(4) 0.051(3) 0.017(3) -0.004(2) 0.000(3) 
C17 0.044(3) 0.049(3) 0.069(3) 0.019(3) 0.008(2) 0.012(2) 
C18 0.049(3) 0.041(3) 0.045(3) 0.004(2) 0.001(2) 0.001(2) 
C19 0.048(3) 0.046(3) 0.043(3) 0.008(2) -0.008(2) -0.002(2) 
C20 0.074(4) 0.046(3) 0.070(4) 0.011(3) 0.019(3) -0.003(3) 
C21 0.068(4) 0.073(4) 0.115(6) -0.007(4) 0.037(4) 0.003(3) 
C22 0.048(3) 0.045(3) 0.036(2) -0.001(2) 0.002(2) -0.003(2) 
C23 0.081(4) 0.051(3) 0.060(3) 0.017(3) 0.014(3) 0.007(3) 
C24 0.072(4) 0.067(4) 0.059(3) 0.003(3) 0.014(3) 0.005(3) 
C25 0.055(2) 0.049(2) 0.043(2) -0.0038(18) -0.0166(18) 0.0067(18) 
C26 0.080(3) 0.045(2) 0.060(2) -0.015(2) -0.033(2) 0.009(2) 
C27 0.090(3) 0.061(3) 0.060(3) 0.004(2) -0.033(2) -0.032(2) 
C28 0.057(2) 0.081(3) 0.053(2) -0.003(2) -0.013(2) -0.021(2) 
C29 0.055(2) 0.050(2) 0.047(2) -0.0076(19) -0.0182(19) 0.0073(19) 
C30 0.073(3) 0.086(3) 0.054(3) 0.000(3) -0.009(3) -0.002(3) 
C31 0.109(4) 0.061(3) 0.090(4) -0.031(3) -0.040(3) 0.028(3) 
C32 0.129(4) 0.075(3) 0.084(4) 0.013(3) -0.041(3) -0.052(3) 
C33 0.065(3) 0.132(5) 0.079(4) -0.010(4) -0.001(3) -0.025(3) 
C34 0.080(3) 0.067(3) 0.066(3) -0.005(3) -0.029(3) 0.026(3) 

_refine_ls_extinction_method 
    'None'
_oxford_refine_ls_scale 1.095(3) 
loop_
 _geom_bond_atom_site_label_1
 _geom_bond_site_symmetry_1
 _geom_bond_atom_site_label_2
 _geom_bond_site_symmetry_2
 _geom_bond_distance
 _geom_bond_publ_flag
Ti1 . N1 . 1.748(4)    yes
Ti1 . N3 . 2.080(4)    yes
Ti1 . N4 . 2.074(4)    yes
Ti1 . C25 . 2.384(5)    yes
Ti1 . C26 . 2.407(5)    yes
Ti1 . C27 . 2.382(5)    yes
Ti1 . C28 . 2.324(5)    yes
Ti1 . C29 . 2.354(5)    yes
N1 . C1 . 1.362(6)    yes
N2 . O1 . 1.427(5)    yes
N2 . C1 . 1.281(6)    yes
N3 . C12 . 1.328(6)    yes
N3 . C19 . 1.464(6)    yes
N4 . C12 . 1.329(6)    yes
N4 . C22 . 1.475(6)    yes
O1 . C8 . 1.456(6)    yes
F1 . C3 . 1.349(5)    yes
F2 . C4 . 1.330(5)    yes
F3 . C5 . 1.339(5)    yes
F4 . C6 . 1.349(5)    yes
F5 . C7 . 1.335(5)    yes
C1 . C2 . 1.503(6)    yes
C2 . C3 . 1.370(7)    yes
C2 . C7 . 1.382(6)    yes
C3 . C4 . 1.379(7)    yes
C4 . C5 . 1.379(7)    yes
C5 . C6 . 1.359(7)    yes
C6 . C7 . 1.375(6)    yes
C8 . C9 . 1.509(7)    yes
C8 . C10 . 1.487(8)    yes
C8 . C11 . 1.508(7)    yes
C9 . H91 . 0.970    no
C9 . H92 . 0.964    no
C9 . H93 . 0.959    no
C10 . H101 . 0.971    no
C10 . H102 . 0.967    no
C10 . H103 . 0.971    no
C11 . H111 . 0.967    no
C11 . H112 . 0.955    no
C11 . H113 . 0.964    no
C12 . C13 . 1.495(6)    yes
C13 . C14 . 1.399(6)    yes
C13 . C18 . 1.384(7)    yes
C14 . C15 . 1.389(7)    yes
C14 . H141 . 0.940    no
C15 . C16 . 1.373(8)    yes
C15 . H151 . 0.931    no
C16 . C17 . 1.385(7)    yes
C16 . H161 . 0.937    no
C17 . C18 . 1.377(7)    yes
C17 . H171 . 0.926    no
C18 . H181 . 0.936    no
C19 . C20 . 1.511(7)    yes
C19 . C21 . 1.508(8)    yes
C19 . H191 . 0.975    no
C20 . H201 . 0.957    no
C20 . H202 . 0.961    no
C20 . H203 . 0.956    no
C21 . H211 . 0.963    no
C21 . H212 . 0.961    no
C21 . H213 . 0.957    no
C22 . C23 . 1.521(7)    yes
C22 . C24 . 1.494(8)    yes
C22 . H221 . 0.976    no
C23 . H231 . 0.959    no
C23 . H232 . 0.968    no
C23 . H233 . 0.965    no
C24 . H241 . 0.964    no
C24 . H242 . 0.960    no
C24 . H243 . 0.958    no
C25 . C26 . 1.409(8)    yes
C25 . C29 . 1.425(7)    yes
C25 . C30 . 1.492(8)    yes
C26 . C27 . 1.395(10)    yes
C26 . C31 . 1.515(9)    yes
C27 . C28 . 1.412(10)    yes
C27 . C32 . 1.503(9)    yes
C28 . C29 . 1.399(8)    yes
C28 . C33 . 1.520(10)    yes
C29 . C34 . 1.501(8)    yes
C30 . H301 . 0.952    no
C30 . H302 . 0.958    no
C30 . H303 . 0.963    no
C31 . H311 . 0.964    no
C31 . H312 . 0.964    no
C31 . H313 . 0.962    no
C32 . H321 . 0.962    no
C32 . H322 . 0.966    no
C32 . H323 . 0.970    no
C33 . H331 . 0.967    no
C33 . H332 . 0.968    no
C33 . H333 . 0.964    no
C34 . H341 . 0.951    no
C34 . H342 . 0.953    no
C34 . H343 . 0.949    no
loop_
 _geom_angle_atom_site_label_1
 _geom_angle_site_symmetry_1
 _geom_angle_atom_site_label_2
 _geom_angle_site_symmetry_2
 _geom_angle_atom_site_label_3
 _geom_angle_site_symmetry_3
 _geom_angle
 _geom_angle_publ_flag
N1 . Ti1 . N3 . 106.30(15)    yes
N1 . Ti1 . N4 . 107.84(16)    yes
N3 . Ti1 . N4 . 64.97(15)    yes
N1 . Ti1 . C25 . 120.92(18)    yes
N3 . Ti1 . C25 . 96.24(17)    yes
N4 . Ti1 . C25 . 131.11(15)    yes
N1 . Ti1 . C26 . 150.90(18)    yes
N3 . Ti1 . C26 . 94.15(19)    yes
N4 . Ti1 . C26 . 99.43(16)    yes
C25 . Ti1 . C26 . 34.20(18)    yes
N1 . Ti1 . C27 . 131.4(2)    yes
N3 . Ti1 . C27 . 122.3(2)    yes
N4 . Ti1 . C27 . 94.14(18)    yes
C25 . Ti1 . C27 . 56.8(2)    yes
C26 . Ti1 . C27 . 33.9(2)    yes
N1 . Ti1 . C28 . 98.7(2)    yes
N3 . Ti1 . C28 . 151.06(19)    yes
N4 . Ti1 . C28 . 120.8(2)    yes
C25 . Ti1 . C28 . 57.6(2)    yes
C26 . Ti1 . C28 . 57.4(2)    yes
N1 . Ti1 . C29 . 93.28(17)    yes
N3 . Ti1 . C29 . 127.47(18)    yes
N4 . Ti1 . C29 . 151.77(16)    yes
C25 . Ti1 . C29 . 35.00(18)    yes
C26 . Ti1 . C29 . 57.65(18)    yes
C27 . Ti1 . C28 . 34.9(2)    yes
C27 . Ti1 . C29 . 57.6(2)    yes
C28 . Ti1 . C29 . 34.8(2)    yes
Ti1 . N1 . C1 . 167.0(3)    yes
O1 . N2 . C1 . 109.7(3)    yes
Ti1 . N3 . C12 . 89.5(3)    yes
Ti1 . N3 . C19 . 143.1(3)    yes
C12 . N3 . C19 . 121.9(4)    yes
Ti1 . N4 . C12 . 89.8(3)    yes
Ti1 . N4 . C22 . 141.5(3)    yes
C12 . N4 . C22 . 121.8(4)    yes
N2 . O1 . C8 . 110.6(3)    yes
N1 . C1 . N2 . 122.0(4)    yes
N1 . C1 . C2 . 113.9(4)    yes
N2 . C1 . C2 . 124.1(4)    yes
C1 . C2 . C3 . 123.2(4)    yes
C1 . C2 . C7 . 119.4(4)    yes
C3 . C2 . C7 . 117.2(4)    yes
F1 . C3 . C2 . 120.2(4)    yes
F1 . C3 . C4 . 117.2(4)    yes
C2 . C3 . C4 . 122.5(4)    yes
C3 . C4 . F2 . 121.8(4)    yes
C3 . C4 . C5 . 118.7(4)    yes
F2 . C4 . C5 . 119.5(4)    yes
F3 . C5 . C4 . 119.4(4)    yes
F3 . C5 . C6 . 120.8(4)    yes
C4 . C5 . C6 . 119.8(4)    yes
F4 . C6 . C5 . 119.8(4)    yes
F4 . C6 . C7 . 119.6(4)    yes
C5 . C6 . C7 . 120.6(4)    yes
C2 . C7 . F5 . 120.1(4)    yes
C2 . C7 . C6 . 121.0(4)    yes
F5 . C7 . C6 . 118.8(4)    yes
O1 . C8 . C9 . 110.9(4)    yes
O1 . C8 . C10 . 108.2(4)    yes
C9 . C8 . C10 . 112.0(5)    yes
O1 . C8 . C11 . 102.9(4)    yes
C9 . C8 . C11 . 111.3(4)    yes
C10 . C8 . C11 . 111.0(5)    yes
C8 . C9 . H91 . 109.7    no
C8 . C9 . H92 . 109.6    no
H91 . C9 . H92 . 110.3    no
C8 . C9 . H93 . 108.2    no
H91 . C9 . H93 . 108.9    no
H92 . C9 . H93 . 110.1    no
C8 . C10 . H101 . 110.1    no
C8 . C10 . H102 . 108.0    no
H101 . C10 . H102 . 109.5    no
C8 . C10 . H103 . 109.0    no
H101 . C10 . H103 . 110.2    no
H102 . C10 . H103 . 109.9    no
C8 . C11 . H111 . 110.6    no
C8 . C11 . H112 . 109.3    no
H111 . C11 . H112 . 108.2    no
C8 . C11 . H113 . 110.7    no
H111 . C11 . H113 . 109.0    no
H112 . C11 . H113 . 108.9    no
N4 . C12 . N3 . 114.2(4)    yes
N4 . C12 . C13 . 123.0(4)    yes
N3 . C12 . C13 . 122.7(4)    yes
C12 . C13 . C14 . 121.0(4)    yes
C12 . C13 . C18 . 119.5(4)    yes
C14 . C13 . C18 . 119.5(4)    yes
C13 . C14 . C15 . 119.1(5)    yes
C13 . C14 . H141 . 119.8    no
C15 . C14 . H141 . 121.1    no
C14 . C15 . C16 . 120.9(5)    yes
C14 . C15 . H151 . 119.4    no
C16 . C15 . H151 . 119.7    no
C15 . C16 . C17 . 119.8(5)    yes
C15 . C16 . H161 . 120.3    no
C17 . C16 . H161 . 120.0    no
C16 . C17 . C18 . 120.0(5)    yes
C16 . C17 . H171 . 119.4    no
C18 . C17 . H171 . 120.6    no
C13 . C18 . C17 . 120.7(4)    yes
C13 . C18 . H181 . 119.3    no
C17 . C18 . H181 . 120.0    no
N3 . C19 . C20 . 110.0(4)    yes
N3 . C19 . C21 . 112.3(4)    yes
C20 . C19 . C21 . 110.5(5)    yes
N3 . C19 . H191 . 108.3    no
C20 . C19 . H191 . 107.7    no
C21 . C19 . H191 . 107.9    no
C19 . C20 . H201 . 110.6    no
C19 . C20 . H202 . 110.6    no
H201 . C20 . H202 . 108.8    no
C19 . C20 . H203 . 109.2    no
H201 . C20 . H203 . 108.5    no
H202 . C20 . H203 . 109.0    no
C19 . C21 . H211 . 110.4    no
C19 . C21 . H212 . 111.2    no
H211 . C21 . H212 . 109.0    no
C19 . C21 . H213 . 108.7    no
H211 . C21 . H213 . 108.9    no
H212 . C21 . H213 . 108.6    no
N4 . C22 . C23 . 111.4(4)    yes
N4 . C22 . C24 . 109.3(4)    yes
C23 . C22 . C24 . 111.6(4)    yes
N4 . C22 . H221 . 108.0    no
C23 . C22 . H221 . 108.4    no
C24 . C22 . H221 . 107.9    no
C22 . C23 . H231 . 110.0    no
C22 . C23 . H232 . 110.3    no
H231 . C23 . H232 . 109.4    no
C22 . C23 . H233 . 108.9    no
H231 . C23 . H233 . 108.8    no
H232 . C23 . H233 . 109.5    no
C22 . C24 . H241 . 110.1    no
C22 . C24 . H242 . 108.7    no
H241 . C24 . H242 . 108.8    no
C22 . C24 . H243 . 109.6    no
H241 . C24 . H243 . 110.3    no
H242 . C24 . H243 . 109.3    no
Ti1 . C25 . C26 . 73.8(3)    yes
Ti1 . C25 . C29 . 71.3(3)    yes
C26 . C25 . C29 . 108.2(5)    yes
Ti1 . C25 . C30 . 125.9(3)    yes
C26 . C25 . C30 . 126.3(5)    yes
C29 . C25 . C30 . 125.1(5)    yes
Ti1 . C26 . C25 . 72.0(3)    yes
Ti1 . C26 . C27 . 72.1(3)    yes
C25 . C26 . C27 . 107.9(5)    yes
Ti1 . C26 . C31 . 122.3(3)    yes
C25 . C26 . C31 . 124.1(7)    yes
C27 . C26 . C31 . 128.0(6)    yes
Ti1 . C27 . C26 . 74.0(3)    yes
Ti1 . C27 . C28 . 70.3(3)    yes
C26 . C27 . C28 . 108.3(5)    yes
Ti1 . C27 . C32 . 124.4(4)    yes
C26 . C27 . C32 . 122.8(7)    yes
C28 . C27 . C32 . 128.8(7)    yes
Ti1 . C28 . C27 . 74.8(3)    yes
Ti1 . C28 . C29 . 73.8(3)    yes
C27 . C28 . C29 . 108.6(6)    yes
Ti1 . C28 . C33 . 118.7(4)    yes
C27 . C28 . C33 . 126.8(6)    yes
C29 . C28 . C33 . 124.6(7)    yes
Ti1 . C29 . C25 . 73.7(3)    yes
Ti1 . C29 . C28 . 71.5(3)    yes
C25 . C29 . C28 . 107.0(5)    yes
Ti1 . C29 . C34 . 121.6(3)    yes
C25 . C29 . C34 . 125.3(5)    yes
C28 . C29 . C34 . 127.7(6)    yes
C25 . C30 . H301 . 110.3    no
C25 . C30 . H302 . 108.3    no
H301 . C30 . H302 . 109.5    no
C25 . C30 . H303 . 110.1    no
H301 . C30 . H303 . 109.5    no
H302 . C30 . H303 . 109.1    no
C26 . C31 . H311 . 106.9    no
C26 . C31 . H312 . 110.5    no
H311 . C31 . H312 . 109.6    no
C26 . C31 . H313 . 110.3    no
H311 . C31 . H313 . 110.2    no
H312 . C31 . H313 . 109.3    no
C27 . C32 . H321 . 107.2    no
C27 . C32 . H322 . 108.9    no
H321 . C32 . H322 . 110.1    no
C27 . C32 . H323 . 108.9    no
H321 . C32 . H323 . 111.4    no
H322 . C32 . H323 . 110.2    no
C28 . C33 . H331 . 108.5    no
C28 . C33 . H332 . 108.6    no
H331 . C33 . H332 . 110.3    no
C28 . C33 . H333 . 110.2    no
H331 . C33 . H333 . 110.0    no
H332 . C33 . H333 . 109.2    no
C29 . C34 . H341 . 107.7    no
C29 . C34 . H342 . 110.6    no
H341 . C34 . H342 . 108.6    no
C29 . C34 . H343 . 109.8    no
H341 . C34 . H343 . 109.2    no
H342 . C34 . H343 . 110.7    no

#===end

data_compound_29

# local code LG7

_chemical_name_systematic
;        
Cp*Ti{PhC(NiPr)2}{N(C(C6F5)NOtBu)C(C6F5)NC(C6F5)N}
;
 
_refine_special_details 

; 
The H atoms were all located in a difference map and repositioned 
geometrically. They were initially refined with soft restraints on the 
bond lengths and angles to regularise their geometry, 
after which the positions were refined with riding constraints 
; 
_cell_length_a                    12.62440(10)
_cell_length_b                    18.3472(2)
_cell_length_c                    20.5455(2)
_cell_angle_alpha                 90
_cell_angle_beta                  97.6073(4)
_cell_angle_gamma                 90
_cell_volume                      4716.91(8)
 
_symmetry_cell_setting            'Monoclinic' 
_symmetry_space_group_name_H-M    'P 1 21/n 1 ' 
_symmetry_space_group_name_Hall   '-P 2yn'  
loop_
 _symmetry_equiv_pos_as_xyz
 'x,y,z'
 '-x,-y,-z'
 '-x+1/2,y+1/2,-z+1/2'
 'x+1/2,-y+1/2,z+1/2'

loop_
_atom_type_symbol
_atom_type_scat_dispersion_real
_atom_type_scat_dispersion_imag
_atom_type_scat_Cromer_Mann_a1
_atom_type_scat_Cromer_Mann_b1
_atom_type_scat_Cromer_Mann_a2
_atom_type_scat_Cromer_Mann_b2
_atom_type_scat_Cromer_Mann_a3
_atom_type_scat_Cromer_Mann_b3
_atom_type_scat_Cromer_Mann_a4
_atom_type_scat_Cromer_Mann_b4
_atom_type_scat_Cromer_Mann_c
_atom_type_scat_source  
 C       0.0033   0.0016   2.3100  20.8439   1.0200  10.2075   1.5886   0.5687
   0.8650  51.6512   0.2156 'International Tables Vol C 4.2.6.8 and 6.1.1.4'
 H       0.0000   0.0000   0.4930  10.5109   0.3229  26.1257   0.1402   3.1424
   0.0408  57.7998   0.0030 'International Tables Vol C 4.2.6.8 and 6.1.1.4'
 N       0.0061   0.0033  12.2126   0.0057   3.1322   9.8933   2.0125  28.9975
   1.1663   0.5826 -11.5290 'International Tables Vol C 4.2.6.8 and 6.1.1.4'
 F       0.0171   0.0103   3.5392  10.2825   2.6412   4.2944   1.5170   0.2615
   1.0243  26.1476   0.2776 'International Tables Vol C 4.2.6.8 and 6.1.1.4'
 O       0.0106   0.0060   3.0485  13.2771   2.2868   5.7011   1.5463   0.3239
   0.8670  32.9089   0.2508 'International Tables Vol C 4.2.6.8 and 6.1.1.4'
 Ti      0.2776   0.4457   9.7595   7.8508   7.3558   0.5000   1.6991  35.6338
   1.9021 116.1050   1.2807 'International Tables Vol C 4.2.6.8 and 6.1.1.4'
 
 
_cell_formula_units_Z                    4


_chemical_formula_sum             'C48 H43 F15 N6 O1 Ti1'
_chemical_formula_moiety          'C48 H43 F15 N6 O1 Ti1'
_chemical_compound_source                ?
_chemical_formula_weight           1052.78
 
 
_cell_measurement_reflns_used        10996
_cell_measurement_theta_min              5
_cell_measurement_theta_max             27
_cell_measurement_temperature          150
 
_exptl_crystal_description        'prism' 
_exptl_crystal_colour             'red' 
_exptl_crystal_size_min           0.010 
_exptl_crystal_size_mid           0.010 
_exptl_crystal_size_max           0.020 
 
_exptl_crystal_density_diffrn     1.482 
_exptl_crystal_density_meas       ? 
_exptl_crystal_density_method     'not measured' 
_exptl_crystal_F_000              2152 
_exptl_absorpt_coefficient_mu     0.285 
 
_exptl_absorpt_correction_type    multi-scan 
_exptl_absorpt_process_details    'CrysAlis, (Oxford Diffraction, 2002)' 
_exptl_absorpt_correction_T_min   1.00 
_exptl_absorpt_correction_T_max   1.00 
_diffrn_measurement_device_type   'Oxford Diffraction SuperNova' 
_diffrn_measurement_device        'Area' 
_diffrn_radiation_monochromator   'graphite' 
_diffrn_radiation_type            'Mo K\a'
_diffrn_radiation_wavelength           0.71073
_diffrn_measurement_method        \w 
 
_computing_data_collection        'SuperNova, (Oxford Diffraction, 2010)' 
_computing_cell_refinement        'CrysAlis, (Oxford Diffraction, 2002)' 
_computing_data_reduction         'CrysAlis, (Oxford Diffraction, 2002)' 
_computing_structure_solution     'SIR92 (Altomare et al., 1994)' 
_computing_structure_refinement   'CRYSTALS (Betteridge et al., 2003)' 
_computing_publication_material   'CRYSTALS (Betteridge et al., 2003)' 
_computing_molecular_graphics     'CAMERON (Watkin et al., 1996)' 
 
_diffrn_standards_interval_time   . 
_diffrn_standards_interval_count  . 
_diffrn_standards_number          0 
_diffrn_standards_decay_%         ? 
 
_diffrn_ambient_temperature        150
_diffrn_reflns_number             20756 
_reflns_number_total              10744 
_diffrn_reflns_av_R_equivalents   0.017 
 
 
_diffrn_reflns_theta_min          5.118 
_diffrn_reflns_theta_max          27.479 
_diffrn_measured_fraction_theta_max 0.993 
 
_diffrn_reflns_theta_full         26.655 
_diffrn_measured_fraction_theta_full 0.993 
 
 
_diffrn_reflns_limit_h_min        -16 
_diffrn_reflns_limit_h_max        16 
_diffrn_reflns_limit_k_min        -23 
_diffrn_reflns_limit_k_max        23 
_diffrn_reflns_limit_l_min        -26 
_diffrn_reflns_limit_l_max        26 
_reflns_limit_h_min               -16 
_reflns_limit_h_max               16 
_reflns_limit_k_min               0 
_reflns_limit_k_max               23 
_reflns_limit_l_min               0 
_reflns_limit_l_max               26 
 
_oxford_diffrn_Wilson_B_factor    2.42 
_oxford_diffrn_Wilson_scale       6.23 
 
_atom_sites_solution_primary      Direct 
_atom_sites_solution_secondary  difmap
_atom_sites_solution_hydrogens    difmap
 
_refine_diff_density_min          -0.38 
_refine_diff_density_max          0.24 
 
 
# The current dictionary definitions do not cover the 
# situation where the reflections used for refinement were 
# selected by a user-defined sigma threshold 
 
 
# The values actually used during refinement 
_oxford_reflns_threshold_expression_ref     I>3.0\s(I)
_refine_ls_number_reflns          8128 
_refine_ls_number_restraints      0 
_refine_ls_number_parameters      640 
_oxford_refine_ls_R_factor_ref    0.0340 
_refine_ls_wR_factor_ref          0.0430 
_refine_ls_goodness_of_fit_ref    1.0572 
_refine_ls_shift/su_max           0.0011918 
_refine_ls_shift/su_mean          0.0000544 
 
 
# The values computed from all data 
_oxford_reflns_number_all         10744 
_refine_ls_R_factor_all           0.0511 
_refine_ls_wR_factor_all          0.0577 
 
# The values computed with a 2 sigma cutoff - a la SHELX 
_reflns_threshold_expression      I>2.0\s(I)
_reflns_number_gt                 8615 
_refine_ls_R_factor_gt            0.0367 
_refine_ls_wR_factor_gt           0.0446 
 
_chemical_absolute_configuration  '.' 
 
 
_refine_ls_structure_factor_coef  F 
_refine_ls_matrix_type            full
_refine_ls_hydrogen_treatment     constr   
_refine_ls_weighting_scheme       calc 
_refine_ls_weighting_details 
;
 Method, part 1, Chebychev polynomial, (Watkin, 1994, Prince, 1982) 
 [weight] = 1.0/[A~0~*T~0~(x)+A~1~*T~1~(x) ... +A~n-1~]*T~n-1~(x)] 
 where A~i~ are the Chebychev coefficients listed below and x= Fcalc/Fmax 
 Method = Robust Weighting (Prince, 1982) 
 W = [weight] * [1-(deltaF/6*sigmaF)^2^]^2^ 
 A~i~ are: 
 0.964 0.729 0.644 
;
_publ_section_references 
; 
Oxford Diffraction, (2010). CrysAlisPro. 
 
Oxford Diffraction, (2010). Supernova User Manual. 
 
Betteridge, P.W., Carruthers, J.R., Cooper, R.I., 
Prout, K. & Watkin, D.J. (2003). J. Appl. Cryst. 36, 1487. 
 
Watkin, D.J., Prout, C.K. & Pearce, L.J. (1996). CAMERON, Chemical 
Crystallography Laboratory, Oxford, UK. 
 
Altomare, A., Cascarano, G., Giacovazzo, C., Guagliardi, A., Burla, M.C., 
Polidori, G. & Camalli, M. (1994). J. Appl. Cryst. 27, 435. 
 
Watkin D.J. (1994). 
Acta Cryst, A50, 411-437. 
 
Prince, E. 
Mathematical Techniques in Crystallography 
and Materials Science 
Springer-Verlag, New York, 1982. 
; 

# Uequiv = arithmetic mean of Ui i.e. Ueqiv = (U1+U2+U3)/3


loop_
_atom_site_label
_atom_site_type_symbol
_atom_site_fract_x
_atom_site_fract_y
_atom_site_fract_z
_atom_site_U_iso_or_equiv
_atom_site_occupancy
_atom_site_adp_type
_atom_site_refinement_flags_posn
_atom_site_refinement_flags_adp
_atom_site_refinement_flags_occupancy
_atom_site_disorder_assembly
_atom_site_disorder_group
_atom_site_attached_hydrogens
Ti1 Ti 0.383137(19) 0.329046(13) 0.743852(11) 0.0222 1.0000 Uani . . . . . . 
N1 N 0.38441(9) 0.38105(6) 0.82254(6) 0.0249 1.0000 Uani . . . . . . 
N2 N 0.55845(9) 0.40984(6) 0.87193(6) 0.0257 1.0000 Uani . . . . . . 
N3 N 0.55258(9) 0.35625(6) 0.76384(5) 0.0229 1.0000 Uani . . . . . . 
N4 N 0.63720(9) 0.29284(6) 0.68713(6) 0.0258 1.0000 Uani . . . . . . 
N5 N 0.38383(10) 0.34957(7) 0.63709(6) 0.0260 1.0000 Uani . . . . . . 
N6 N 0.27392(10) 0.40354(7) 0.69720(6) 0.0280 1.0000 Uani . . . . . . 
O1 O 0.70023(8) 0.30130(5) 0.63612(5) 0.0283 1.0000 Uani . . . . . . 
F1 F 0.27804(8) 0.38753(5) 0.94126(5) 0.0398 1.0000 Uani . . . . . . 
F2 F 0.18828(8) 0.48979(6) 1.00840(5) 0.0453 1.0000 Uani . . . . . . 
F3 F 0.26839(8) 0.62769(5) 1.01598(4) 0.0385 1.0000 Uani . . . . . . 
F4 F 0.44716(9) 0.65927(5) 0.96155(5) 0.0449 1.0000 Uani . . . . . . 
F5 F 0.53180(8) 0.56019(5) 0.88820(5) 0.0424 1.0000 Uani . . . . . . 
F6 F 0.73448(7) 0.25762(5) 0.84227(5) 0.0364 1.0000 Uani . . . . . . 
F7 F 0.94611(7) 0.26301(5) 0.88134(5) 0.0410 1.0000 Uani . . . . . . 
F8 F 1.04650(7) 0.39392(6) 0.89940(5) 0.0421 1.0000 Uani . . . . . . 
F9 F 0.93515(8) 0.51894(5) 0.87107(6) 0.0435 1.0000 Uani . . . . . . 
F10 F 0.72337(7) 0.51420(5) 0.83194(5) 0.0360 1.0000 Uani . . . . . . 
F11 F 0.84797(7) 0.37905(5) 0.70818(4) 0.0302 1.0000 Uani . . . . . . 
F12 F 0.92311(7) 0.50026(5) 0.66094(5) 0.0370 1.0000 Uani . . . . . . 
F13 F 0.78949(9) 0.61379(5) 0.62302(5) 0.0448 1.0000 Uani . . . . . . 
F14 F 0.58029(9) 0.60610(5) 0.64197(6) 0.0477 1.0000 Uani . . . . . . 
F15 F 0.50320(7) 0.48501(5) 0.68923(5) 0.0367 1.0000 Uani . . . . . . 
C1 C 0.44809(11) 0.41520(7) 0.86476(6) 0.0232 1.0000 Uani . . . . . . 
C2 C 0.40718(11) 0.46985(8) 0.91031(6) 0.0245 1.0000 Uani . . . . . . 
C3 C 0.31990(11) 0.45472(8) 0.94303(7) 0.0275 1.0000 Uani . . . . . . 
C4 C 0.27395(12) 0.50690(9) 0.97904(7) 0.0309 1.0000 Uani . . . . . . 
C5 C 0.31557(12) 0.57604(8) 0.98430(6) 0.0297 1.0000 Uani . . . . . . 
C6 C 0.40478(13) 0.59233(8) 0.95516(7) 0.0303 1.0000 Uani . . . . . . 
C7 C 0.44861(11) 0.53993(8) 0.91822(7) 0.0280 1.0000 Uani . . . . . . 
C8 C 0.60124(11) 0.38309(7) 0.82212(6) 0.0233 1.0000 Uani . . . . . . 
C9 C 0.72184(11) 0.38558(7) 0.83567(6) 0.0239 1.0000 Uani . . . . . . 
C10 C 0.78214(11) 0.32268(8) 0.84795(7) 0.0266 1.0000 Uani . . . . . . 
C11 C 0.89086(11) 0.32500(8) 0.86858(7) 0.0291 1.0000 Uani . . . . . . 
C12 C 0.94183(11) 0.39117(9) 0.87744(7) 0.0302 1.0000 Uani . . . . . . 
C13 C 0.88485(12) 0.45456(8) 0.86399(7) 0.0299 1.0000 Uani . . . . . . 
C14 C 0.77634(11) 0.45122(8) 0.84409(7) 0.0272 1.0000 Uani . . . . . . 
C15 C 0.62250(11) 0.35399(7) 0.71463(6) 0.0229 1.0000 Uani . . . . . . 
C16 C 0.67001(11) 0.42452(7) 0.69592(6) 0.0237 1.0000 Uani . . . . . . 
C17 C 0.77788(11) 0.43252(7) 0.68991(6) 0.0249 1.0000 Uani . . . . . . 
C18 C 0.81890(12) 0.49589(8) 0.66683(7) 0.0292 1.0000 Uani . . . . . . 
C19 C 0.75200(13) 0.55398(8) 0.64886(7) 0.0324 1.0000 Uani . . . . . . 
C20 C 0.64633(13) 0.54964(8) 0.65777(8) 0.0321 1.0000 Uani . . . . . . 
C21 C 0.60726(12) 0.48616(8) 0.68201(7) 0.0280 1.0000 Uani . . . . . . 
C22 C 0.74920(14) 0.23177(8) 0.62079(8) 0.0349 1.0000 Uani . . . . . . 
C23 C 0.81120(16) 0.19960(10) 0.68234(10) 0.0457 1.0000 Uani . . . . . . 
C24 C 0.82397(18) 0.25512(10) 0.57234(10) 0.0501 1.0000 Uani . . . . . . 
C25 C 0.66339(17) 0.18047(10) 0.58886(11) 0.0498 1.0000 Uani . . . . . . 
C26 C 0.30886(11) 0.39932(8) 0.63847(7) 0.0269 1.0000 Uani . . . . . . 
C27 C 0.26222(12) 0.44723(9) 0.58256(7) 0.0297 1.0000 Uani . . . . . . 
C28 C 0.30768(13) 0.51437(9) 0.57138(8) 0.0376 1.0000 Uani . . . . . . 
C29 C 0.25872(15) 0.56054(10) 0.52273(9) 0.0433 1.0000 Uani . . . . . . 
C30 C 0.16546(15) 0.53947(11) 0.48474(8) 0.0448 1.0000 Uani . . . . . . 
C31 C 0.12074(14) 0.47237(11) 0.49476(8) 0.0425 1.0000 Uani . . . . . . 
C32 C 0.16782(13) 0.42684(10) 0.54433(8) 0.0354 1.0000 Uani . . . . . . 
C33 C 0.42542(12) 0.32556(8) 0.57658(7) 0.0294 1.0000 Uani . . . . . . 
C34 C 0.49460(14) 0.38166(9) 0.54675(8) 0.0360 1.0000 Uani . . . . . . 
C35 C 0.33907(14) 0.29758(10) 0.52247(8) 0.0380 1.0000 Uani . . . . . . 
C36 C 0.20640(12) 0.46483(9) 0.71344(7) 0.0338 1.0000 Uani . . . . . . 
C37 C 0.13371(14) 0.44124(11) 0.76274(9) 0.0426 1.0000 Uani . . . . . . 
C38 C 0.27282(15) 0.53104(9) 0.73878(9) 0.0413 1.0000 Uani . . . . . . 
C39 C 0.42639(12) 0.20131(8) 0.76292(7) 0.0305 1.0000 Uani . . . . . . 
C40 C 0.34989(12) 0.20386(8) 0.70609(7) 0.0286 1.0000 Uani . . . . . . 
C41 C 0.25371(12) 0.23314(8) 0.72392(8) 0.0326 1.0000 Uani . . . . . . 
C42 C 0.26993(14) 0.24563(9) 0.79248(8) 0.0366 1.0000 Uani . . . . . . 
C43 C 0.37746(14) 0.22783(8) 0.81628(8) 0.0356 1.0000 Uani . . . . . . 
C44 C 0.53276(14) 0.16520(9) 0.76708(10) 0.0438 1.0000 Uani . . . . . . 
C45 C 0.36221(16) 0.16713(9) 0.64250(8) 0.0402 1.0000 Uani . . . . . . 
C46 C 0.15043(14) 0.24087(11) 0.67889(11) 0.0500 1.0000 Uani . . . . . . 
C47 C 0.18418(19) 0.26483(11) 0.83358(12) 0.0585 1.0000 Uani . . . . . . 
C48 C 0.4271(2) 0.22822(11) 0.88676(9) 0.0579 1.0000 Uani . . . . . . 
H231 H 0.7608 0.1869 0.7132 0.0702 1.0000 Uiso R . . . . . 
H232 H 0.8649 0.2359 0.7022 0.0701 1.0000 Uiso R . . . . . 
H233 H 0.8466 0.1559 0.6688 0.0700 1.0000 Uiso R . . . . . 
H241 H 0.8596 0.2110 0.5585 0.0752 1.0000 Uiso R . . . . . 
H242 H 0.8773 0.2900 0.5951 0.0761 1.0000 Uiso R . . . . . 
H243 H 0.7824 0.2777 0.5352 0.0761 1.0000 Uiso R . . . . . 
H251 H 0.6981 0.1355 0.5762 0.0747 1.0000 Uiso R . . . . . 
H252 H 0.6141 0.1681 0.6216 0.0746 1.0000 Uiso R . . . . . 
H253 H 0.6246 0.2052 0.5499 0.0751 1.0000 Uiso R . . . . . 
H281 H 0.3749 0.5290 0.5972 0.0455 1.0000 Uiso R . . . . . 
H291 H 0.2907 0.6082 0.5157 0.0532 1.0000 Uiso R . . . . . 
H301 H 0.1305 0.5719 0.4506 0.0537 1.0000 Uiso R . . . . . 
H311 H 0.0562 0.4568 0.4664 0.0516 1.0000 Uiso R . . . . . 
H321 H 0.1357 0.3797 0.5525 0.0436 1.0000 Uiso R . . . . . 
H331 H 0.4729 0.2824 0.5912 0.0345 1.0000 Uiso R . . . . . 
H341 H 0.5207 0.3590 0.5087 0.0545 1.0000 Uiso R . . . . . 
H342 H 0.5565 0.3959 0.5792 0.0554 1.0000 Uiso R . . . . . 
H343 H 0.4508 0.4252 0.5318 0.0554 1.0000 Uiso R . . . . . 
H351 H 0.2819 0.2721 0.5432 0.0579 1.0000 Uiso R . . . . . 
H352 H 0.3100 0.3390 0.4956 0.0581 1.0000 Uiso R . . . . . 
H353 H 0.3732 0.2625 0.4953 0.0578 1.0000 Uiso R . . . . . 
H361 H 0.1590 0.4799 0.6717 0.0415 1.0000 Uiso R . . . . . 
H371 H 0.0867 0.4004 0.7439 0.0661 1.0000 Uiso R . . . . . 
H372 H 0.1795 0.4251 0.8034 0.0657 1.0000 Uiso R . . . . . 
H373 H 0.0877 0.4830 0.7727 0.0661 1.0000 Uiso R . . . . . 
H381 H 0.2232 0.5714 0.7461 0.0608 1.0000 Uiso R . . . . . 
H382 H 0.3162 0.5183 0.7806 0.0615 1.0000 Uiso R . . . . . 
H383 H 0.3191 0.5461 0.7056 0.0612 1.0000 Uiso R . . . . . 
H441 H 0.5246 0.1121 0.7728 0.0667 1.0000 Uiso R . . . . . 
H442 H 0.5648 0.1746 0.7272 0.0682 1.0000 Uiso R . . . . . 
H443 H 0.5785 0.1846 0.8048 0.0677 1.0000 Uiso R . . . . . 
H451 H 0.3060 0.1840 0.6072 0.0609 1.0000 Uiso R . . . . . 
H452 H 0.3549 0.1145 0.6484 0.0607 1.0000 Uiso R . . . . . 
H453 H 0.4333 0.1779 0.6304 0.0605 1.0000 Uiso R . . . . . 
H461 H 0.1125 0.1941 0.6775 0.0760 1.0000 Uiso R . . . . . 
H462 H 0.1636 0.2545 0.6336 0.0779 1.0000 Uiso R . . . . . 
H463 H 0.1061 0.2774 0.6964 0.0767 1.0000 Uiso R . . . . . 
H471 H 0.1566 0.2206 0.8509 0.0902 1.0000 Uiso R . . . . . 
H472 H 0.1253 0.2918 0.8082 0.0918 1.0000 Uiso R . . . . . 
H473 H 0.2144 0.2950 0.8701 0.0909 1.0000 Uiso R . . . . . 
H481 H 0.3923 0.2666 0.9108 0.0885 1.0000 Uiso R . . . . . 
H482 H 0.5035 0.2385 0.8883 0.0885 1.0000 Uiso R . . . . . 
H483 H 0.4178 0.1806 0.9069 0.0880 1.0000 Uiso R . . . . . 
loop_
_atom_site_aniso_label
_atom_site_aniso_U_11
_atom_site_aniso_U_22
_atom_site_aniso_U_33
_atom_site_aniso_U_23
_atom_site_aniso_U_13
_atom_site_aniso_U_12
Ti1 0.02283(12) 0.02248(12) 0.02151(11) -0.00073(9) 0.00413(8) -0.00075(9) 
N1 0.0241(5) 0.0276(6) 0.0240(5) 0.0005(4) 0.0066(4) -0.0001(4) 
N2 0.0237(5) 0.0291(6) 0.0244(5) -0.0021(4) 0.0038(4) 0.0017(5) 
N3 0.0229(5) 0.0226(5) 0.0237(5) -0.0014(4) 0.0055(4) 0.0018(4) 
N4 0.0281(6) 0.0248(6) 0.0263(5) 0.0000(4) 0.0097(5) 0.0031(5) 
N5 0.0286(6) 0.0272(6) 0.0226(5) -0.0001(4) 0.0047(4) 0.0020(5) 
N6 0.0286(6) 0.0307(6) 0.0249(5) 0.0002(5) 0.0045(5) 0.0056(5) 
O1 0.0362(5) 0.0221(5) 0.0295(5) -0.0014(4) 0.0150(4) 0.0054(4) 
F1 0.0434(5) 0.0359(5) 0.0446(5) -0.0074(4) 0.0222(4) -0.0097(4) 
F2 0.0434(5) 0.0529(6) 0.0454(5) -0.0070(5) 0.0270(4) -0.0007(5) 
F3 0.0491(6) 0.0398(5) 0.0278(4) -0.0031(4) 0.0093(4) 0.0190(4) 
F4 0.0605(6) 0.0274(5) 0.0495(6) -0.0072(4) 0.0171(5) -0.0047(4) 
F5 0.0440(5) 0.0349(5) 0.0537(6) -0.0059(4) 0.0265(5) -0.0080(4) 
F6 0.0319(4) 0.0249(4) 0.0525(5) 0.0032(4) 0.0060(4) -0.0021(3) 
F7 0.0298(4) 0.0369(5) 0.0573(6) 0.0108(4) 0.0100(4) 0.0118(4) 
F8 0.0202(4) 0.0569(6) 0.0489(5) -0.0031(5) 0.0031(4) -0.0003(4) 
F9 0.0339(5) 0.0359(5) 0.0615(6) -0.0123(4) 0.0097(4) -0.0102(4) 
F10 0.0345(5) 0.0243(4) 0.0492(5) -0.0037(4) 0.0058(4) 0.0036(3) 
F11 0.0272(4) 0.0300(4) 0.0344(4) 0.0033(3) 0.0071(3) 0.0052(3) 
F12 0.0302(4) 0.0409(5) 0.0396(5) 0.0041(4) 0.0033(4) -0.0098(4) 
F13 0.0534(6) 0.0285(5) 0.0496(6) 0.0098(4) -0.0034(5) -0.0135(4) 
F14 0.0489(6) 0.0237(4) 0.0666(7) 0.0072(4) -0.0063(5) 0.0080(4) 
F15 0.0272(4) 0.0306(4) 0.0519(5) -0.0006(4) 0.0044(4) 0.0071(3) 
C1 0.0241(6) 0.0251(6) 0.0214(6) 0.0008(5) 0.0065(5) 0.0019(5) 
C2 0.0247(6) 0.0287(7) 0.0202(6) -0.0013(5) 0.0033(5) 0.0037(5) 
C3 0.0296(7) 0.0295(7) 0.0242(6) -0.0001(5) 0.0059(5) 0.0009(6) 
C4 0.0307(7) 0.0406(8) 0.0235(6) 0.0004(6) 0.0112(5) 0.0058(6) 
C5 0.0367(8) 0.0330(7) 0.0196(6) -0.0011(5) 0.0044(5) 0.0124(6) 
C6 0.0373(8) 0.0252(7) 0.0280(7) -0.0012(5) 0.0030(6) 0.0014(6) 
C7 0.0270(7) 0.0322(7) 0.0263(6) 0.0003(5) 0.0088(5) 0.0014(6) 
C8 0.0232(6) 0.0224(6) 0.0244(6) -0.0005(5) 0.0037(5) 0.0013(5) 
C9 0.0240(6) 0.0273(6) 0.0210(6) -0.0025(5) 0.0054(5) 0.0020(5) 
C10 0.0274(7) 0.0262(7) 0.0273(6) -0.0002(5) 0.0076(5) 0.0001(5) 
C11 0.0255(7) 0.0334(7) 0.0294(7) 0.0027(6) 0.0078(5) 0.0056(6) 
C12 0.0192(6) 0.0435(8) 0.0288(7) -0.0026(6) 0.0066(5) 0.0013(6) 
C13 0.0281(7) 0.0310(7) 0.0317(7) -0.0078(6) 0.0079(6) -0.0054(6) 
C14 0.0279(7) 0.0261(7) 0.0283(7) -0.0039(5) 0.0057(5) 0.0030(5) 
C15 0.0228(6) 0.0225(6) 0.0240(6) 0.0000(5) 0.0048(5) 0.0027(5) 
C16 0.0283(7) 0.0218(6) 0.0210(6) -0.0013(5) 0.0039(5) 0.0011(5) 
C17 0.0293(7) 0.0229(6) 0.0228(6) -0.0011(5) 0.0040(5) 0.0027(5) 
C18 0.0294(7) 0.0310(7) 0.0263(6) -0.0016(6) 0.0006(5) -0.0056(6) 
C19 0.0422(8) 0.0232(7) 0.0299(7) 0.0022(5) -0.0028(6) -0.0073(6) 
C20 0.0393(8) 0.0199(6) 0.0347(7) -0.0010(5) -0.0042(6) 0.0034(6) 
C21 0.0284(7) 0.0252(7) 0.0302(7) -0.0042(5) 0.0025(5) 0.0016(5) 
C22 0.0434(9) 0.0232(7) 0.0416(8) -0.0047(6) 0.0184(7) 0.0082(6) 
C23 0.0496(10) 0.0354(9) 0.0545(10) 0.0026(8) 0.0153(8) 0.0168(8) 
C24 0.0630(12) 0.0377(9) 0.0568(11) 0.0002(8) 0.0353(9) 0.0144(8) 
C25 0.0589(12) 0.0337(9) 0.0594(11) -0.0177(8) 0.0181(9) -0.0013(8) 
C26 0.0259(6) 0.0285(7) 0.0262(6) 0.0002(5) 0.0026(5) -0.0012(5) 
C27 0.0284(7) 0.0360(8) 0.0256(6) 0.0032(6) 0.0063(5) 0.0075(6) 
C28 0.0326(8) 0.0414(9) 0.0391(8) 0.0085(7) 0.0058(6) 0.0044(6) 
C29 0.0432(9) 0.0419(9) 0.0466(9) 0.0149(8) 0.0127(7) 0.0097(7) 
C30 0.0463(9) 0.0560(11) 0.0327(8) 0.0120(7) 0.0070(7) 0.0201(8) 
C31 0.0357(8) 0.0594(11) 0.0315(8) 0.0010(7) 0.0013(6) 0.0136(8) 
C32 0.0317(8) 0.0431(9) 0.0315(7) 0.0019(6) 0.0041(6) 0.0051(6) 
C33 0.0330(7) 0.0312(7) 0.0248(6) -0.0025(5) 0.0065(5) 0.0026(6) 
C34 0.0404(8) 0.0408(8) 0.0288(7) 0.0003(6) 0.0122(6) -0.0009(7) 
C35 0.0433(9) 0.0420(9) 0.0284(7) -0.0073(6) 0.0038(6) 0.0005(7) 
C36 0.0311(7) 0.0398(8) 0.0308(7) -0.0003(6) 0.0056(6) 0.0117(6) 
C37 0.0350(8) 0.0558(11) 0.0387(8) 0.0020(7) 0.0109(7) 0.0117(7) 
C38 0.0455(9) 0.0346(8) 0.0444(9) -0.0030(7) 0.0084(7) 0.0125(7) 
C39 0.0347(7) 0.0215(6) 0.0345(7) 0.0046(5) 0.0015(6) -0.0051(6) 
C40 0.0322(7) 0.0213(6) 0.0323(7) -0.0007(5) 0.0043(6) -0.0044(5) 
C41 0.0293(7) 0.0273(7) 0.0410(8) -0.0025(6) 0.0042(6) -0.0072(6) 
C42 0.0422(9) 0.0291(7) 0.0418(8) -0.0026(6) 0.0181(7) -0.0107(6) 
C43 0.0497(9) 0.0276(7) 0.0292(7) 0.0035(6) 0.0042(6) -0.0106(7) 
C44 0.0374(9) 0.0279(8) 0.0632(11) 0.0113(7) -0.0038(8) 0.0014(7) 
C45 0.0568(10) 0.0290(7) 0.0355(8) -0.0039(6) 0.0090(7) -0.0030(7) 
C46 0.0316(8) 0.0466(10) 0.0688(12) -0.0089(9) -0.0046(8) -0.0040(7) 
C47 0.0674(13) 0.0471(11) 0.0706(13) -0.0094(10) 0.0448(11) -0.0151(9) 
C48 0.0980(17) 0.0433(10) 0.0296(8) 0.0107(7) -0.0024(9) -0.0138(10) 

_refine_ls_extinction_method 
    'None'
_oxford_refine_ls_scale 0.3613(4) 
loop_
 _geom_bond_atom_site_label_1
 _geom_bond_site_symmetry_1
 _geom_bond_atom_site_label_2
 _geom_bond_site_symmetry_2
 _geom_bond_distance
 _geom_bond_publ_flag
Ti1 . N1 . 1.8756(12)    yes
Ti1 . N3 . 2.1820(11)    yes
Ti1 . N5 . 2.2267(11)    yes
Ti1 . N6 . 2.0829(12)    yes
Ti1 . C39 . 2.4264(15)    yes
Ti1 . C40 . 2.4429(14)    yes
Ti1 . C41 . 2.3992(14)    yes
Ti1 . C42 . 2.4003(15)    yes
Ti1 . C43 . 2.3867(15)    yes
N1 . C1 . 1.2673(18)    yes
N2 . C1 . 1.3850(17)    yes
N2 . C8 . 1.3139(18)    yes
N3 . C8 . 1.3634(18)    yes
N3 . C15 . 1.4280(17)    yes
N4 . O1 . 1.4058(15)    yes
N4 . C15 . 1.2808(18)    yes
N5 . C26 . 1.3180(19)    yes
N5 . C33 . 1.4791(17)    yes
N6 . C26 . 1.3406(18)    yes
N6 . C36 . 1.4757(18)    yes
O1 . C22 . 1.4700(16)    yes
F1 . C3 . 1.3399(17)    yes
F2 . C4 . 1.3435(17)    yes
F3 . C5 . 1.3337(16)    yes
F4 . C6 . 1.3390(18)    yes
F5 . C7 . 1.3390(17)    yes
F6 . C10 . 1.3349(16)    yes
F7 . C11 . 1.3418(17)    yes
F8 . C12 . 1.3395(17)    yes
F9 . C13 . 1.3398(17)    yes
F10 . C14 . 1.3418(16)    yes
F11 . C17 . 1.3411(16)    yes
F12 . C18 . 1.3394(18)    yes
F13 . C19 . 1.3329(17)    yes
F14 . C20 . 1.3424(17)    yes
F15 . C21 . 1.3415(17)    yes
C1 . C2 . 1.5085(18)    yes
C2 . C3 . 1.3925(19)    yes
C2 . C7 . 1.390(2)    yes
C3 . C4 . 1.384(2)    yes
C4 . C5 . 1.372(2)    yes
C5 . C6 . 1.377(2)    yes
C6 . C7 . 1.385(2)    yes
C8 . C9 . 1.5118(18)    yes
C9 . C10 . 1.3873(19)    yes
C9 . C14 . 1.386(2)    yes
C10 . C11 . 1.383(2)    yes
C11 . C12 . 1.375(2)    yes
C12 . C13 . 1.376(2)    yes
C13 . C14 . 1.378(2)    yes
C15 . C16 . 1.4977(18)    yes
C16 . C17 . 1.391(2)    yes
C16 . C21 . 1.3886(19)    yes
C17 . C18 . 1.382(2)    yes
C18 . C19 . 1.379(2)    yes
C19 . C20 . 1.373(2)    yes
C20 . C21 . 1.383(2)    yes
C22 . C23 . 1.516(3)    yes
C22 . C24 . 1.521(2)    yes
C22 . C25 . 1.517(3)    yes
C23 . H231 . 0.984    no
C23 . H232 . 0.998    no
C23 . H233 . 0.976    no
C24 . H241 . 0.986    no
C24 . H242 . 0.999    no
C24 . H243 . 0.961    no
C25 . H251 . 0.985    no
C25 . H252 . 1.001    no
C25 . H253 . 0.992    no
C26 . C27 . 1.5031(19)    yes
C27 . C28 . 1.391(2)    yes
C27 . C32 . 1.389(2)    yes
C28 . C29 . 1.391(2)    yes
C28 . H281 . 0.977    no
C29 . C30 . 1.379(3)    yes
C29 . H291 . 0.982    no
C30 . C31 . 1.381(3)    yes
C30 . H301 . 0.979    no
C31 . C32 . 1.389(2)    yes
C31 . H311 . 0.980    no
C32 . H321 . 0.979    no
C33 . C34 . 1.530(2)    yes
C33 . C35 . 1.539(2)    yes
C33 . H331 . 1.014    no
C34 . H341 . 0.980    no
C34 . H342 . 0.993    no
C34 . H343 . 0.997    no
C35 . H351 . 1.001    no
C35 . H352 . 0.981    no
C35 . H353 . 0.987    no
C36 . C37 . 1.517(2)    yes
C36 . C38 . 1.528(3)    yes
C36 . H361 . 1.017    no
C37 . H371 . 1.001    no
C37 . H372 . 0.996    no
C37 . H373 . 0.999    no
C38 . H381 . 0.994    no
C38 . H382 . 0.983    no
C38 . H383 . 0.994    no
C39 . C40 . 1.414(2)    yes
C39 . C43 . 1.414(2)    yes
C39 . C44 . 1.490(2)    yes
C40 . C41 . 1.419(2)    yes
C40 . C45 . 1.496(2)    yes
C41 . C42 . 1.415(2)    yes
C41 . C46 . 1.502(2)    yes
C42 . C43 . 1.419(3)    yes
C42 . C47 . 1.500(2)    yes
C43 . C48 . 1.500(2)    yes
C44 . H441 . 0.989    no
C44 . H442 . 0.976    no
C44 . H443 . 0.971    no
C45 . H451 . 0.994    no
C45 . H452 . 0.979    no
C45 . H453 . 0.982    no
C46 . H461 . 0.981    no
C46 . H462 . 0.998    no
C46 . H463 . 0.972    no
C47 . H471 . 0.968    no
C47 . H472 . 0.983    no
C47 . H473 . 0.970    no
C48 . H481 . 0.994    no
C48 . H482 . 0.980    no
C48 . H483 . 0.980    no
loop_
 _geom_angle_atom_site_label_1
 _geom_angle_site_symmetry_1
 _geom_angle_atom_site_label_2
 _geom_angle_site_symmetry_2
 _geom_angle_atom_site_label_3
 _geom_angle_site_symmetry_3
 _geom_angle
 _geom_angle_publ_flag
N1 . Ti1 . N3 . 79.92(5)    yes
N1 . Ti1 . N5 . 139.68(5)    yes
N3 . Ti1 . N5 . 90.87(4)    yes
N1 . Ti1 . N6 . 89.57(5)    yes
N3 . Ti1 . N6 . 120.62(5)    yes
N5 . Ti1 . N6 . 61.60(4)    yes
N1 . Ti1 . C39 . 112.09(5)    yes
N3 . Ti1 . C39 . 89.80(5)    yes
N5 . Ti1 . C39 . 106.99(5)    yes
N6 . Ti1 . C39 . 146.02(5)    yes
N1 . Ti1 . C40 . 137.19(5)    yes
N3 . Ti1 . C40 . 113.44(5)    yes
N5 . Ti1 . C40 . 82.47(5)    yes
N6 . Ti1 . C40 . 113.29(5)    yes
C39 . Ti1 . C40 . 33.77(5)    yes
N1 . Ti1 . C41 . 116.63(5)    yes
N3 . Ti1 . C41 . 145.93(5)    yes
N5 . Ti1 . C41 . 92.71(5)    yes
N6 . Ti1 . C41 . 90.48(5)    yes
C39 . Ti1 . C41 . 56.83(5)    yes
N1 . Ti1 . C42 . 84.45(5)    yes
N3 . Ti1 . C42 . 133.66(5)    yes
N5 . Ti1 . C42 . 126.73(5)    yes
N6 . Ti1 . C42 . 102.45(6)    yes
C39 . Ti1 . C42 . 56.67(5)    yes
N1 . Ti1 . C43 . 81.72(5)    yes
N3 . Ti1 . C43 . 99.80(5)    yes
N5 . Ti1 . C43 . 138.60(5)    yes
N6 . Ti1 . C43 . 136.46(6)    yes
C39 . Ti1 . C43 . 34.16(5)    yes
C40 . Ti1 . C41 . 34.08(5)    yes
C40 . Ti1 . C42 . 56.35(5)    yes
C41 . Ti1 . C42 . 34.30(6)    yes
C40 . Ti1 . C43 . 56.52(5)    yes
C41 . Ti1 . C43 . 57.31(6)    yes
C42 . Ti1 . C43 . 34.48(6)    yes
Ti1 . N1 . C1 . 140.68(10)    yes
C1 . N2 . C8 . 117.07(11)    yes
Ti1 . N3 . C8 . 124.36(9)    yes
Ti1 . N3 . C15 . 122.86(8)    yes
C8 . N3 . C15 . 112.55(11)    yes
O1 . N4 . C15 . 111.19(11)    yes
Ti1 . N5 . C26 . 89.97(8)    yes
Ti1 . N5 . C33 . 145.66(9)    yes
C26 . N5 . C33 . 124.07(12)    yes
Ti1 . N6 . C26 . 95.72(9)    yes
Ti1 . N6 . C36 . 139.72(9)    yes
C26 . N6 . C36 . 121.08(12)    yes
N4 . O1 . C22 . 111.07(10)    yes
N2 . C1 . N1 . 125.15(12)    yes
N2 . C1 . C2 . 113.78(11)    yes
N1 . C1 . C2 . 120.99(12)    yes
C1 . C2 . C3 . 121.65(13)    yes
C1 . C2 . C7 . 122.22(12)    yes
C3 . C2 . C7 . 115.95(12)    yes
C2 . C3 . F1 . 120.32(12)    yes
C2 . C3 . C4 . 122.33(14)    yes
F1 . C3 . C4 . 117.35(13)    yes
C3 . C4 . F2 . 119.86(14)    yes
C3 . C4 . C5 . 119.91(13)    yes
F2 . C4 . C5 . 120.23(13)    yes
F3 . C5 . C4 . 120.29(14)    yes
F3 . C5 . C6 . 120.12(14)    yes
C4 . C5 . C6 . 119.57(13)    yes
F4 . C6 . C5 . 119.72(13)    yes
F4 . C6 . C7 . 120.47(14)    yes
C5 . C6 . C7 . 119.79(14)    yes
C2 . C7 . C6 . 122.35(13)    yes
C2 . C7 . F5 . 120.60(12)    yes
C6 . C7 . F5 . 117.02(13)    yes
N3 . C8 . N2 . 129.43(12)    yes
N3 . C8 . C9 . 119.89(11)    yes
N2 . C8 . C9 . 110.67(11)    yes
C8 . C9 . C10 . 121.56(12)    yes
C8 . C9 . C14 . 121.35(12)    yes
C10 . C9 . C14 . 116.66(12)    yes
C9 . C10 . F6 . 119.86(12)    yes
C9 . C10 . C11 . 121.92(13)    yes
F6 . C10 . C11 . 118.18(13)    yes
C10 . C11 . F7 . 120.20(13)    yes
C10 . C11 . C12 . 119.75(13)    yes
F7 . C11 . C12 . 120.04(13)    yes
F8 . C12 . C11 . 120.10(14)    yes
F8 . C12 . C13 . 120.12(14)    yes
C11 . C12 . C13 . 119.78(13)    yes
F9 . C13 . C12 . 119.71(13)    yes
F9 . C13 . C14 . 120.64(14)    yes
C12 . C13 . C14 . 119.65(13)    yes
C9 . C14 . F10 . 119.87(12)    yes
C9 . C14 . C13 . 122.21(13)    yes
F10 . C14 . C13 . 117.92(13)    yes
N3 . C15 . N4 . 118.49(12)    yes
N3 . C15 . C16 . 117.56(11)    yes
N4 . C15 . C16 . 123.88(12)    yes
C15 . C16 . C17 . 122.95(12)    yes
C15 . C16 . C21 . 121.31(12)    yes
C17 . C16 . C21 . 115.73(12)    yes
C16 . C17 . F11 . 121.02(12)    yes
C16 . C17 . C18 . 122.33(13)    yes
F11 . C17 . C18 . 116.63(12)    yes
C17 . C18 . F12 . 119.90(13)    yes
C17 . C18 . C19 . 119.86(14)    yes
F12 . C18 . C19 . 120.23(13)    yes
C18 . C19 . F13 . 120.37(15)    yes
C18 . C19 . C20 . 119.40(14)    yes
F13 . C19 . C20 . 120.23(14)    yes
F14 . C20 . C19 . 120.43(14)    yes
F14 . C20 . C21 . 119.82(14)    yes
C19 . C20 . C21 . 119.74(13)    yes
C16 . C21 . C20 . 122.62(14)    yes
C16 . C21 . F15 . 120.31(13)    yes
C20 . C21 . F15 . 117.01(13)    yes
O1 . C22 . C23 . 110.15(13)    yes
O1 . C22 . C24 . 102.17(12)    yes
C23 . C22 . C24 . 111.04(15)    yes
O1 . C22 . C25 . 109.55(13)    yes
C23 . C22 . C25 . 112.30(15)    yes
C24 . C22 . C25 . 111.18(15)    yes
C22 . C23 . H231 . 108.9    no
C22 . C23 . H232 . 109.2    no
H231 . C23 . H232 . 111.0    no
C22 . C23 . H233 . 106.8    no
H231 . C23 . H233 . 110.3    no
H232 . C23 . H233 . 110.6    no
C22 . C24 . H241 . 107.6    no
C22 . C24 . H242 . 108.1    no
H241 . C24 . H242 . 110.9    no
C22 . C24 . H243 . 108.7    no
H241 . C24 . H243 . 110.3    no
H242 . C24 . H243 . 111.1    no
C22 . C25 . H251 . 108.5    no
C22 . C25 . H252 . 108.7    no
H251 . C25 . H252 . 109.0    no
C22 . C25 . H253 . 108.2    no
H251 . C25 . H253 . 111.1    no
H252 . C25 . H253 . 111.2    no
N6 . C26 . N5 . 112.47(12)    yes
N6 . C26 . C27 . 120.78(12)    yes
N5 . C26 . C27 . 126.75(12)    yes
C26 . C27 . C28 . 121.04(14)    yes
C26 . C27 . C32 . 119.65(14)    yes
C28 . C27 . C32 . 119.14(14)    yes
C27 . C28 . C29 . 120.29(16)    yes
C27 . C28 . H281 . 120.1    no
C29 . C28 . H281 . 119.6    no
C28 . C29 . C30 . 120.05(17)    yes
C28 . C29 . H291 . 119.7    no
C30 . C29 . H291 . 120.2    no
C29 . C30 . C31 . 120.05(15)    yes
C29 . C30 . H301 . 120.4    no
C31 . C30 . H301 . 119.6    no
C30 . C31 . C32 . 120.12(16)    yes
C30 . C31 . H311 . 119.7    no
C32 . C31 . H311 . 120.1    no
C27 . C32 . C31 . 120.31(16)    yes
C27 . C32 . H321 . 119.0    no
C31 . C32 . H321 . 120.7    no
N5 . C33 . C34 . 114.92(12)    yes
N5 . C33 . C35 . 114.23(12)    yes
C34 . C33 . C35 . 108.81(13)    yes
N5 . C33 . H331 . 104.2    no
C34 . C33 . H331 . 107.3    no
C35 . C33 . H331 . 106.8    no
C33 . C34 . H341 . 107.7    no
C33 . C34 . H342 . 110.4    no
H341 . C34 . H342 . 109.2    no
C33 . C34 . H343 . 109.9    no
H341 . C34 . H343 . 109.1    no
H342 . C34 . H343 . 110.5    no
C33 . C35 . H351 . 109.3    no
C33 . C35 . H352 . 108.9    no
H351 . C35 . H352 . 111.4    no
C33 . C35 . H353 . 107.8    no
H351 . C35 . H353 . 109.2    no
H352 . C35 . H353 . 110.2    no
N6 . C36 . C37 . 110.62(14)    yes
N6 . C36 . C38 . 112.06(13)    yes
C37 . C36 . C38 . 110.65(14)    yes
N6 . C36 . H361 . 108.0    no
C37 . C36 . H361 . 107.5    no
C38 . C36 . H361 . 107.8    no
C36 . C37 . H371 . 109.6    no
C36 . C37 . H372 . 108.0    no
H371 . C37 . H372 . 110.5    no
C36 . C37 . H373 . 109.7    no
H371 . C37 . H373 . 108.8    no
H372 . C37 . H373 . 110.2    no
C36 . C38 . H381 . 108.4    no
C36 . C38 . H382 . 109.0    no
H381 . C38 . H382 . 109.5    no
C36 . C38 . H383 . 109.4    no
H381 . C38 . H383 . 109.7    no
H382 . C38 . H383 . 110.8    no
Ti1 . C39 . C40 . 73.76(8)    yes
Ti1 . C39 . C43 . 71.38(9)    yes
C40 . C39 . C43 . 107.95(14)    yes
Ti1 . C39 . C44 . 128.36(10)    yes
C40 . C39 . C44 . 125.02(15)    yes
C43 . C39 . C44 . 126.27(15)    yes
Ti1 . C40 . C39 . 72.48(8)    yes
Ti1 . C40 . C41 . 71.28(8)    yes
C39 . C40 . C41 . 108.26(13)    yes
Ti1 . C40 . C45 . 131.87(10)    yes
C39 . C40 . C45 . 124.58(14)    yes
C41 . C40 . C45 . 125.96(14)    yes
Ti1 . C41 . C40 . 74.65(8)    yes
Ti1 . C41 . C42 . 72.89(9)    yes
C40 . C41 . C42 . 107.59(14)    yes
Ti1 . C41 . C46 . 123.50(12)    yes
C40 . C41 . C46 . 125.39(15)    yes
C42 . C41 . C46 . 126.67(16)    yes
Ti1 . C42 . C41 . 72.81(9)    yes
Ti1 . C42 . C43 . 72.24(9)    yes
C41 . C42 . C43 . 108.16(14)    yes
Ti1 . C42 . C47 . 126.74(12)    yes
C41 . C42 . C47 . 125.32(18)    yes
C43 . C42 . C47 . 126.07(17)    yes
Ti1 . C43 . C42 . 73.28(9)    yes
Ti1 . C43 . C39 . 74.46(8)    yes
C42 . C43 . C39 . 107.95(14)    yes
Ti1 . C43 . C48 . 123.71(11)    yes
C42 . C43 . C48 . 126.17(17)    yes
C39 . C43 . C48 . 125.49(18)    yes
C39 . C44 . H441 . 109.8    no
C39 . C44 . H442 . 110.1    no
H441 . C44 . H442 . 109.6    no
C39 . C44 . H443 . 108.6    no
H441 . C44 . H443 . 109.1    no
H442 . C44 . H443 . 109.7    no
C40 . C45 . H451 . 110.6    no
C40 . C45 . H452 . 108.3    no
H451 . C45 . H452 . 109.0    no
C40 . C45 . H453 . 109.5    no
H451 . C45 . H453 . 109.9    no
H452 . C45 . H453 . 109.4    no
C41 . C46 . H461 . 108.4    no
C41 . C46 . H462 . 111.1    no
H461 . C46 . H462 . 109.4    no
C41 . C46 . H463 . 109.4    no
H461 . C46 . H463 . 108.1    no
H462 . C46 . H463 . 110.4    no
C42 . C47 . H471 . 109.3    no
C42 . C47 . H472 . 111.8    no
H471 . C47 . H472 . 109.5    no
C42 . C47 . H473 . 109.3    no
H471 . C47 . H473 . 108.4    no
H472 . C47 . H473 . 108.4    no
C43 . C48 . H481 . 109.1    no
C43 . C48 . H482 . 108.4    no
H481 . C48 . H482 . 110.2    no
C43 . C48 . H483 . 110.2    no
H481 . C48 . H483 . 109.6    no
H482 . C48 . H483 . 109.4    no

#===end

data_compound_33-BPh4

# local code ADS206

_chemical_name_systematic         
;
[PhC{N(iPr)H}2][BPh4]
;
_chemical_melting_point           ?

 
_publ_section_exptl_refinement 
; 
The methyls of the isopropyl group attached to N(1) were positionally
disordered and were refined in a "split site" model subject to similarity
restraints for the associated distances, angles and ADPs.

N-bound H atoms were located in a Fourier difference map and positionally
and isotropically refined. 

The C-bound H atoms were all positioned geometrically. 
then initially refined with soft restraints on the 
bond lengths and angles to regularise their geometry
after which the positions were refined with riding constraints 
; 
 

_cell_length_a                    9.7572(8)
_cell_length_b                    10.1086(7)
_cell_length_c                    16.5470(11)
_cell_angle_alpha                 98.985(6)
_cell_angle_beta                  105.885(6)
_cell_angle_gamma                 95.944(6)
_cell_volume                      1532.0(2)
 
_symmetry_cell_setting            'Triclinic' 
_symmetry_space_group_name_H-M    'P -1 ' 
_symmetry_space_group_name_Hall   ? 
loop_
 _symmetry_equiv_pos_as_xyz
 'x,y,z'
 '-x,-y,-z'

loop_
_atom_type_symbol
_atom_type_scat_dispersion_real
_atom_type_scat_dispersion_imag
_atom_type_scat_Cromer_Mann_a1
_atom_type_scat_Cromer_Mann_b1
_atom_type_scat_Cromer_Mann_a2
_atom_type_scat_Cromer_Mann_b2
_atom_type_scat_Cromer_Mann_a3
_atom_type_scat_Cromer_Mann_b3
_atom_type_scat_Cromer_Mann_a4
_atom_type_scat_Cromer_Mann_b4
_atom_type_scat_Cromer_Mann_c
_atom_type_scat_source  
 C       0.0181   0.0091   2.3100  20.8439   1.0200  10.2075   1.5886   0.5687
   0.8650  51.6512   0.2156 'International Tables Vol C 4.2.6.8 and 6.1.1.4'
 B       0.0090   0.0039   2.0545  23.2185   1.3326   1.0210   1.0979  60.3498
   0.7068   0.1403  -0.1932 'International Tables Vol C 4.2.6.8 and 6.1.1.4'
 N       0.0311   0.0180  12.2126   0.0057   3.1322   9.8933   2.0125  28.9975
   1.1663   0.5826 -11.5290 'International Tables Vol C 4.2.6.8 and 6.1.1.4'
 H       0.0000   0.0000   0.4930  10.5109   0.3229  26.1257   0.1402   3.1424
   0.0408  57.7998   0.0030 'International Tables Vol C 4.2.6.8 and 6.1.1.4'
 
 
_cell_formula_units_Z                    2


_chemical_formula_sum             'C37 H41 B1 N2'
_chemical_formula_moiety          'C13 H21 N2, C24 H20 B1'
_chemical_compound_source                ?
_chemical_formula_weight            524.56
 
 
_cell_measurement_reflns_used         4544
_cell_measurement_theta_min              4
_cell_measurement_theta_max             66
_cell_measurement_temperature          150
 

 
_exptl_crystal_description        'block' 
_exptl_crystal_colour             'colourless' 
_exptl_crystal_size_min           0.050 
_exptl_crystal_size_mid           0.050 
_exptl_crystal_size_max           0.050 
 
_exptl_crystal_density_diffrn     1.137 
_exptl_crystal_density_meas       ? 
_exptl_crystal_density_method     'not measured' 
_exptl_crystal_F_000              564 
_exptl_absorpt_coefficient_mu     0.488 
 
_exptl_absorpt_correction_type    multi-scan 
_exptl_absorpt_process_details    'CrysAlis, (Oxford Diffraction, 2002)' 
_exptl_absorpt_correction_T_min   0.98 
_exptl_absorpt_correction_T_max   0.98 
_diffrn_measurement_device_type   'Oxford Diffraction SuperNova' 
_diffrn_measurement_device        'Area' 
_diffrn_radiation_monochromator   'graphite' 
_diffrn_radiation_type            'Cu K\a'
_diffrn_radiation_wavelength      1.54180
_diffrn_measurement_method        \w 
 
_computing_data_collection        'SuperNova, (Oxford Diffraction, 2010)' 
_computing_cell_refinement        'CrysAlis, (Oxford Diffraction, 2002)' 
_computing_data_reduction         'CrysAlis, (Oxford Diffraction, 2002)' 
_computing_structure_solution     'SIR92 (Altomare et al., 1994)' 
_computing_structure_refinement   'CRYSTALS (Betteridge et al., 2003)' 
_computing_publication_material   'CRYSTALS (Betteridge et al., 2003)' 
_computing_molecular_graphics     'CAMERON (Watkin et al., 1996)' 
 
_diffrn_standards_interval_time   . 
_diffrn_standards_interval_count  . 
_diffrn_standards_number          0 
_diffrn_standards_decay_%         ? 
 
_diffrn_ambient_temperature        150
_diffrn_reflns_number             13322 
_reflns_number_total              5117 
_diffrn_reflns_av_R_equivalents   0.037 
 
 
 
_diffrn_reflns_theta_min          4.482 
_diffrn_reflns_theta_max          66.190 
_diffrn_measured_fraction_theta_max 0.971 
 
_diffrn_reflns_theta_full         66.280 
_diffrn_measured_fraction_theta_full 0.975 
 
 
_diffrn_reflns_limit_h_min        -11 
_diffrn_reflns_limit_h_max        11 
_diffrn_reflns_limit_k_min        -11 
_diffrn_reflns_limit_k_max        11 
_diffrn_reflns_limit_l_min        -19 
_diffrn_reflns_limit_l_max        16 
_reflns_limit_h_min               -11 
_reflns_limit_h_max               11 
_reflns_limit_k_min               -11 
_reflns_limit_k_max               11 
_reflns_limit_l_min               0 
_reflns_limit_l_max               19 
 
_oxford_diffrn_Wilson_B_factor    2.71 
_oxford_diffrn_Wilson_scale       0.02 
 
_atom_sites_solution_primary      Direct 
_atom_sites_solution_secondary  difmap
_atom_sites_solution_hydrogens    difmap
 
_refine_diff_density_min          -0.33 
_refine_diff_density_max          0.26 
 
 
# The current dictionary definitions do not cover the 
# situation where the reflections used for refinement were 
# selected by a user-defined sigma threshold 
 
 
# The values actually used during refinement 
_oxford_reflns_threshold_expression_ref     I>2.0\s(I)
_refine_ls_number_reflns          3559 
_refine_ls_number_restraints      40 
_refine_ls_number_parameters      387 
_oxford_refine_ls_R_factor_ref    0.0581 
_refine_ls_wR_factor_ref          0.0284 
_refine_ls_goodness_of_fit_ref    1.1459 
_refine_ls_shift/su_max           0.0029477 
_refine_ls_shift/su_mean          0.0001875 
 
 
# The values computed from all data 
_oxford_reflns_number_all         5094 
_refine_ls_R_factor_all           0.0843 
_refine_ls_wR_factor_all          0.0314 
 
# The values computed with a 2 sigma cutoff - a la SHELX 
_reflns_threshold_expression      I>2.0\s(I)
_reflns_number_gt                 3559 
_refine_ls_R_factor_gt            0.0581 
_refine_ls_wR_factor_gt           0.0284 
 
_chemical_absolute_configuration  '.' 
 
 
_refine_ls_structure_factor_coef  F 
_refine_ls_matrix_type            full
_refine_ls_hydrogen_treatment     mixed        
_refine_ls_weighting_scheme       calc 
_refine_ls_weighting_details 
;
 Method, part 1, Chebychev polynomial, (Watkin, 1994, Prince, 1982) 
 [weight] = 1.0/[A~0~*T~0~(x)+A~1~*T~1~(x) ... +A~n-1~]*T~n-1~(x)] 
 where A~i~ are the Chebychev coefficients listed below and x= Fcalc/Fmax 
 Method = Robust Weighting (Prince, 1982) 
 W = [weight] * [1-(deltaF/6*sigmaF)^2^]^2^ 
 A~i~ are: 
 35.9 18.9 34.2 16.4 2.19 
;
_publ_section_references 
; 
Oxford Diffraction, (2010). CrysAlisPro. 
 
Oxford Diffraction, (2010). Supernova User Manual. 
 
Betteridge, P.W., Carruthers, J.R., Cooper, R.I., 
Prout, K. & Watkin, D.J. (2003). J. Appl. Cryst. 36, 1487. 
 
Watkin, D.J., Prout, C.K. & Pearce, L.J. (1996). CAMERON, Chemical 
Crystallography Laboratory, Oxford, UK. 
 
Altomare, A., Cascarano, G., Giacovazzo, C., Guagliardi, A., Burla, M.C., 
Polidori, G. & Camalli, M. (1994). J. Appl. Cryst. 27, 435. 
 
Watkin D.J. (1994). 
Acta Cryst, A50, 411-437. 
 
Prince, E. 
Mathematical Techniques in Crystallography 
and Materials Science 
Springer-Verlag, New York, 1982. 
; 

# Uequiv = arithmetic mean of Ui i.e. Ueqiv = (U1+U2+U3)/3


loop_
_atom_site_label
_atom_site_type_symbol
_atom_site_fract_x
_atom_site_fract_y
_atom_site_fract_z
_atom_site_U_iso_or_equiv
_atom_site_occupancy
_atom_site_adp_type
_atom_site_refinement_flags_posn
_atom_site_refinement_flags_adp
_atom_site_refinement_flags_occupancy
_atom_site_disorder_assembly
_atom_site_disorder_group
_atom_site_attached_hydrogens
N1 N 0.16478(12) -0.18121(13) 0.81377(7) 0.0403 1.0000 Uani D U . . . . 
N2 N 0.01555(12) -0.10955(12) 0.70325(8) 0.0407 1.0000 Uani . . . . . . 
B1 B 0.47194(13) 0.19348(13) 0.76271(9) 0.0289 1.0000 Uani . . . . . . 
C1 C 0.06073(12) -0.20830(12) 0.74169(8) 0.0303 1.0000 Uani . . . . . . 
C2 C -0.00572(12) -0.35098(12) 0.70075(8) 0.0298 1.0000 Uani . . . . . . 
C3 C 0.07034(13) -0.43276(13) 0.66043(9) 0.0395 1.0000 Uani . . . . . . 
C4 C 0.00530(15) -0.56087(14) 0.61557(11) 0.0488 1.0000 Uani . . . . . . 
C5 C -0.13417(15) -0.60798(13) 0.61229(10) 0.0449 1.0000 Uani . . . . . . 
C6 C -0.20827(14) -0.52823(14) 0.65484(10) 0.0431 1.0000 Uani . . . . . . 
C7 C -0.14491(13) -0.39944(13) 0.69822(9) 0.0381 1.0000 Uani . . . . . . 
C8 C 0.20488(13) -0.27361(12) 0.87494(8) 0.0455 1.0000 Uani D U . . . . 
C11 C -0.08644(16) -0.12529(14) 0.61642(9) 0.0492 1.0000 Uani . . . . . . 
C12 C -0.0070(2) -0.14395(19) 0.54997(11) 0.0762 1.0000 Uani . . . . . . 
C13 C -0.16303(17) -0.00367(16) 0.61352(11) 0.0565 1.0000 Uani . . . . . . 
C14 C 0.51630(12) 0.04039(12) 0.75911(8) 0.0333 1.0000 Uani . . . . . . 
C15 C 0.63559(15) 0.00510(15) 0.81443(10) 0.0436 1.0000 Uani . . . . . . 
C16 C 0.66083(18) -0.13023(18) 0.81124(13) 0.0599 1.0000 Uani . . . . . . 
C17 C 0.5682(2) -0.23191(15) 0.75090(14) 0.0641 1.0000 Uani . . . . . . 
C18 C 0.44923(18) -0.20101(15) 0.69363(12) 0.0551 1.0000 Uani . . . . . . 
C19 C 0.42453(15) -0.06826(13) 0.69875(9) 0.0414 1.0000 Uani . . . . . . 
C20 C 0.32851(13) 0.18515(12) 0.79710(8) 0.0305 1.0000 Uani . . . . . . 
C21 C 0.34010(13) 0.14711(12) 0.87640(8) 0.0347 1.0000 Uani . . . . . . 
C22 C 0.22882(15) 0.14560(13) 0.91384(9) 0.0419 1.0000 Uani . . . . . . 
C23 C 0.09875(14) 0.18159(14) 0.87220(10) 0.0444 1.0000 Uani . . . . . . 
C24 C 0.08258(13) 0.21894(13) 0.79380(9) 0.0409 1.0000 Uani . . . . . . 
C25 C 0.19505(12) 0.21893(12) 0.75696(8) 0.0345 1.0000 Uani . . . . . . 
C26 C 0.44610(11) 0.23845(12) 0.66895(8) 0.0309 1.0000 Uani . . . . . . 
C27 C 0.48962(12) 0.17038(13) 0.60197(8) 0.0336 1.0000 Uani . . . . . . 
C28 C 0.47892(14) 0.21643(14) 0.52608(8) 0.0394 1.0000 Uani . . . . . . 
C29 C 0.42212(14) 0.33277(14) 0.51256(9) 0.0417 1.0000 Uani . . . . . . 
C30 C 0.37767(13) 0.40364(14) 0.57728(9) 0.0410 1.0000 Uani . . . . . . 
C31 C 0.39132(13) 0.35840(12) 0.65259(8) 0.0352 1.0000 Uani . . . . . . 
C32 C 0.59651(12) 0.31281(11) 0.82903(8) 0.0283 1.0000 Uani . . . . . . 
C33 C 0.73757(12) 0.32822(13) 0.82372(8) 0.0341 1.0000 Uani . . . . . . 
C34 C 0.84387(13) 0.43353(14) 0.87483(9) 0.0382 1.0000 Uani . . . . . . 
C35 C 0.81155(13) 0.52968(13) 0.93285(9) 0.0409 1.0000 Uani . . . . . . 
C36 C 0.67331(14) 0.51968(13) 0.93921(9) 0.0387 1.0000 Uani . . . . . . 
C37 C 0.56861(13) 0.41360(13) 0.88821(8) 0.0343 1.0000 Uani . . . . . . 
H1 H 0.0481(18) -0.028(2) 0.7275(11) 0.052(5) 1.0000 Uiso . . . . . . 
H2 H 0.2052(18) -0.102(2) 0.8322(11) 0.048(5) 1.0000 Uiso . . . . . . 
H31 H 0.1644 -0.3997 0.6628 0.0479 1.0000 Uiso R . . . . . 
H41 H 0.0584 -0.6147 0.5877 0.0573 1.0000 Uiso R . . . . . 
H51 H -0.1782 -0.6962 0.5800 0.0533 1.0000 Uiso R . . . . . 
H61 H -0.3030 -0.5618 0.6527 0.0503 1.0000 Uiso R . . . . . 
H71 H -0.1957 -0.3443 0.7270 0.0457 1.0000 Uiso R . . . . . 
H111 H -0.1607 -0.2070 0.6072 0.0588 1.0000 Uiso R . . . . . 
H121 H 0.0441 -0.2204 0.5560 0.1130 1.0000 Uiso R . . . . . 
H122 H 0.0648 -0.0628 0.5596 0.1124 1.0000 Uiso R . . . . . 
H123 H -0.0736 -0.1563 0.4937 0.1121 1.0000 Uiso R . . . . . 
H131 H -0.2094 0.0094 0.6582 0.0877 1.0000 Uiso R . . . . . 
H132 H -0.0900 0.0757 0.6215 0.0866 1.0000 Uiso R . . . . . 
H133 H -0.2342 -0.0166 0.5571 0.0875 1.0000 Uiso R . . . . . 
H151 H 0.7023 0.0738 0.8550 0.0509 1.0000 Uiso R . . . . . 
H161 H 0.7414 -0.1486 0.8501 0.0696 1.0000 Uiso R . . . . . 
H171 H 0.5837 -0.3227 0.7482 0.0728 1.0000 Uiso R . . . . . 
H181 H 0.3844 -0.2719 0.6499 0.0641 1.0000 Uiso R . . . . . 
H191 H 0.3409 -0.0489 0.6606 0.0486 1.0000 Uiso R . . . . . 
H211 H 0.4274 0.1212 0.9065 0.0414 1.0000 Uiso R . . . . . 
H221 H 0.2454 0.1187 0.9676 0.0483 1.0000 Uiso R . . . . . 
H231 H 0.0229 0.1809 0.8972 0.0521 1.0000 Uiso R . . . . . 
H241 H -0.0055 0.2445 0.7635 0.0486 1.0000 Uiso R . . . . . 
H251 H 0.1794 0.2419 0.7024 0.0400 1.0000 Uiso R . . . . . 
H271 H 0.5293 0.0912 0.6096 0.0396 1.0000 Uiso R . . . . . 
H281 H 0.5090 0.1693 0.4835 0.0455 1.0000 Uiso R . . . . . 
H291 H 0.4130 0.3649 0.4613 0.0494 1.0000 Uiso R . . . . . 
H301 H 0.3386 0.4843 0.5693 0.0487 1.0000 Uiso R . . . . . 
H311 H 0.3645 0.4092 0.6965 0.0419 1.0000 Uiso R . . . . . 
H331 H 0.7622 0.2631 0.7839 0.0402 1.0000 Uiso R . . . . . 
H341 H 0.9389 0.4372 0.8697 0.0457 1.0000 Uiso R . . . . . 
H351 H 0.8828 0.6010 0.9680 0.0470 1.0000 Uiso R . . . . . 
H361 H 0.6504 0.5835 0.9777 0.0464 1.0000 Uiso R . . . . . 
H371 H 0.4746 0.4092 0.8938 0.0403 1.0000 Uiso R . . . . . 
C9 C 0.3580(5) -0.2936(4) 0.8852(2) 0.0750 0.5000 Uani D U . . 1 . 
C91 C 0.3675(4) -0.2504(5) 0.9123(2) 0.0749 0.5000 Uani D U . . 2 . 
C10 C 0.1835(4) -0.2128(3) 0.9595(2) 0.0436 0.5000 Uani D U . . 1 . 
C101 C 0.1327(4) -0.2442(4) 0.9440(2) 0.0535 0.5000 Uani D U . . 2 . 
H91 H 0.3841 -0.3507 0.9273 0.1179 0.5000 Uiso R . . . 1 . 
H92 H 0.4187 -0.2041 0.9051 0.1178 0.5000 Uiso R . . . 1 . 
H93 H 0.3649 -0.3386 0.8309 0.1178 0.5000 Uiso R . . . 1 . 
H911 H 0.3971 -0.3051 0.9560 0.1128 0.5000 Uiso R . . . 2 . 
H912 H 0.4003 -0.1569 0.9386 0.1124 0.5000 Uiso R . . . 2 . 
H913 H 0.4116 -0.2736 0.8664 0.1134 0.5000 Uiso R . . . 2 . 
H101 H 0.2005 -0.2757 0.9984 0.0700 0.5000 Uiso R . . . 1 . 
H102 H 0.2522 -0.1305 0.9850 0.0699 0.5000 Uiso R . . . 1 . 
H103 H 0.0861 -0.1920 0.9498 0.0702 0.5000 Uiso R . . . 1 . 
H1011 H 0.1625 -0.2970 0.9877 0.0810 0.5000 Uiso R . . . 2 . 
H1012 H 0.1574 -0.1496 0.9709 0.0808 0.5000 Uiso R . . . 2 . 
H1013 H 0.0294 -0.2639 0.9208 0.0808 0.5000 Uiso R . . . 2 . 
H81 H 0.1437 -0.3585 0.8527 0.0557 1.0000 Uiso R . . . . . 
loop_
_atom_site_aniso_label
_atom_site_aniso_U_11
_atom_site_aniso_U_22
_atom_site_aniso_U_33
_atom_site_aniso_U_23
_atom_site_aniso_U_13
_atom_site_aniso_U_12
N1 0.0461(6) 0.0308(7) 0.0342(6) 0.0040(5) -0.0002(5) -0.0023(5) 
N2 0.0490(7) 0.0236(6) 0.0374(6) 0.0007(5) -0.0016(5) -0.0018(5) 
B1 0.0249(6) 0.0304(7) 0.0303(7) 0.0019(6) 0.0098(5) 0.0000(5) 
C1 0.0331(6) 0.0289(6) 0.0288(7) 0.0051(5) 0.0105(5) 0.0018(5) 
C2 0.0301(6) 0.0283(6) 0.0294(6) 0.0073(5) 0.0056(5) 0.0031(5) 
C3 0.0307(6) 0.0329(7) 0.0525(8) 0.0017(6) 0.0130(6) 0.0020(5) 
C4 0.0442(8) 0.0348(7) 0.0618(10) -0.0031(7) 0.0124(6) 0.0095(6) 
C5 0.0452(8) 0.0262(7) 0.0522(9) 0.0032(6) 0.0001(6) 0.0016(6) 
C6 0.0339(6) 0.0414(8) 0.0511(8) 0.0151(7) 0.0083(6) -0.0051(6) 
C7 0.0363(7) 0.0366(7) 0.0423(8) 0.0049(6) 0.0156(6) 0.0025(6) 
C8 0.0494(8) 0.0465(8) 0.0350(7) 0.0120(6) 0.0013(6) 0.0063(6) 
C11 0.0580(8) 0.0292(7) 0.0415(8) 0.0034(6) -0.0103(6) -0.0045(6) 
C12 0.1308(17) 0.0534(10) 0.0415(9) 0.0085(7) 0.0110(10) 0.0421(11) 
C13 0.0484(8) 0.0484(9) 0.0593(10) 0.0140(8) -0.0078(7) 0.0059(7) 
C14 0.0340(7) 0.0346(7) 0.0355(7) 0.0030(6) 0.0208(5) 0.0019(5) 
C15 0.0471(8) 0.0411(8) 0.0492(8) 0.0116(6) 0.0204(6) 0.0144(6) 
C16 0.0593(10) 0.0547(10) 0.0820(13) 0.0255(9) 0.0347(9) 0.0249(8) 
C17 0.0712(11) 0.0308(8) 0.1124(16) 0.0098(9) 0.0639(12) 0.0127(8) 
C18 0.0605(9) 0.0359(8) 0.0767(11) -0.0052(7) 0.0470(9) -0.0071(7) 
C19 0.0437(7) 0.0327(7) 0.0494(8) -0.0015(6) 0.0245(6) -0.0016(6) 
C20 0.0325(6) 0.0254(6) 0.0302(7) -0.0017(5) 0.0093(5) -0.0008(4) 
C21 0.0381(6) 0.0280(6) 0.0368(7) 0.0018(5) 0.0125(5) 0.0015(5) 
C22 0.0551(9) 0.0343(7) 0.0377(8) -0.0015(6) 0.0250(6) -0.0054(6) 
C23 0.0392(7) 0.0386(7) 0.0551(9) -0.0084(6) 0.0272(6) -0.0043(6) 
C24 0.0320(7) 0.0411(7) 0.0461(9) -0.0046(6) 0.0149(5) 0.0004(5) 
C25 0.0312(6) 0.0319(7) 0.0361(7) -0.0025(5) 0.0101(5) -0.0014(5) 
C26 0.0232(6) 0.0301(6) 0.0341(7) 0.0006(5) 0.0057(5) -0.0030(5) 
C27 0.0310(6) 0.0316(6) 0.0332(7) -0.0013(5) 0.0073(5) -0.0004(5) 
C28 0.0415(7) 0.0447(8) 0.0285(7) 0.0014(6) 0.0117(5) -0.0045(6) 
C29 0.0393(7) 0.0477(8) 0.0329(7) 0.0116(6) 0.0045(5) -0.0057(6) 
C30 0.0377(7) 0.0367(7) 0.0469(9) 0.0132(6) 0.0084(6) 0.0011(5) 
C31 0.0328(6) 0.0346(7) 0.0374(7) 0.0034(6) 0.0127(5) 0.0000(5) 
C32 0.0296(6) 0.0311(6) 0.0236(6) 0.0070(5) 0.0057(4) 0.0056(5) 
C33 0.0290(6) 0.0358(7) 0.0355(7) 0.0027(5) 0.0094(5) 0.0022(5) 
C34 0.0287(6) 0.0421(8) 0.0409(8) 0.0042(6) 0.0099(5) -0.0007(5) 
C35 0.0358(7) 0.0345(7) 0.0439(8) 0.0009(6) 0.0057(5) -0.0062(5) 
C36 0.0421(7) 0.0305(7) 0.0376(7) -0.0055(5) 0.0104(5) 0.0010(5) 
C37 0.0317(6) 0.0335(7) 0.0366(7) 0.0022(5) 0.0113(5) 0.0035(5) 
C9 0.076(3) 0.125(4) 0.047(3) 0.039(3) 0.028(2) 0.058(3) 
C91 0.059(2) 0.126(4) 0.055(3) 0.041(3) 0.0226(19) 0.033(2) 
C10 0.040(2) 0.049(2) 0.055(2) 0.0244(17) 0.0279(17) 0.0014(18) 
C101 0.040(2) 0.050(2) 0.071(3) 0.0211(18) 0.0211(19) -0.0138(18) 

_refine_ls_extinction_method 
    'None'
_oxford_refine_ls_scale 6.016(11) 
loop_
 _geom_bond_atom_site_label_1
 _geom_bond_site_symmetry_1
 _geom_bond_atom_site_label_2
 _geom_bond_site_symmetry_2
 _geom_bond_distance
 _geom_bond_publ_flag
N1 . C1 . 1.3061(17)    yes
N1 . C8 . 1.4847(17)    yes
N1 . H2 . 0.827(19)    no
N2 . C1 . 1.3159(17)    yes
N2 . C11 . 1.4809(18)    yes
N2 . H1 . 0.85(2)    no
B1 . C14 . 1.6461(18)    yes
B1 . C20 . 1.6480(18)    yes
B1 . C26 . 1.645(2)    yes
B1 . C32 . 1.6399(17)    yes
C1 . C2 . 1.4901(18)    yes
C2 . C3 . 1.3803(17)    yes
C2 . C7 . 1.3823(17)    yes
C3 . C4 . 1.379(2)    yes
C3 . H31 . 0.932    no
C4 . C5 . 1.378(2)    yes
C4 . H41 . 0.942    no
C5 . C6 . 1.375(2)    yes
C5 . H51 . 0.955    no
C6 . C7 . 1.375(2)    yes
C6 . H61 . 0.940    no
C7 . H71 . 0.941    no
C8 . C9 . 1.495(4)    yes
C8 . C10 . 1.516(4)    yes
C8 . H81 . 0.950    no
C11 . C12 . 1.509(3)    yes
C11 . C13 . 1.504(2)    yes
C11 . H111 . 1.003    no
C12 . H121 . 0.966    no
C12 . H122 . 0.984    no
C12 . H123 . 0.959    no
C13 . H131 . 0.966    no
C13 . H132 . 0.983    no
C13 . H133 . 0.980    no
C14 . C15 . 1.3873(19)    yes
C14 . C19 . 1.4035(19)    yes
C15 . C16 . 1.410(2)    yes
C15 . H151 . 0.937    no
C16 . C17 . 1.365(3)    yes
C16 . H161 . 0.925    no
C17 . C18 . 1.381(3)    yes
C17 . H171 . 0.942    no
C18 . C19 . 1.382(2)    yes
C18 . H181 . 0.965    no
C19 . H191 . 0.944    no
C20 . C21 . 1.4028(19)    yes
C20 . C25 . 1.3939(17)    yes
C21 . C22 . 1.3894(18)    yes
C21 . H211 . 0.947    no
C22 . C23 . 1.383(2)    yes
C22 . H221 . 0.948    no
C23 . C24 . 1.380(2)    yes
C23 . H231 . 0.942    no
C24 . C25 . 1.3936(17)    yes
C24 . H241 . 0.953    no
C25 . H251 . 0.944    no
C26 . C27 . 1.4007(18)    yes
C26 . C31 . 1.4095(18)    yes
C27 . C28 . 1.388(2)    yes
C27 . H271 . 0.936    no
C28 . C29 . 1.375(2)    yes
C28 . H281 . 0.920    no
C29 . C30 . 1.388(2)    yes
C29 . H291 . 0.940    no
C30 . C31 . 1.371(2)    yes
C30 . H301 . 0.947    no
C31 . H311 . 0.936    no
C32 . C33 . 1.3974(17)    yes
C32 . C37 . 1.4009(17)    yes
C33 . C34 . 1.3907(19)    yes
C33 . H331 . 0.954    no
C34 . C35 . 1.380(2)    yes
C34 . H341 . 0.952    no
C35 . C36 . 1.3759(19)    yes
C35 . H351 . 0.941    no
C36 . C37 . 1.3872(19)    yes
C36 . H361 . 0.923    no
C37 . H371 . 0.944    no
C9 . H91 . 0.971    no
C9 . H92 . 0.984    no
C9 . H93 . 0.965    no
C91 . H911 . 0.977    no
C91 . H912 . 0.957    no
C91 . H913 . 0.981    no
C10 . H101 . 0.968    no
C10 . H102 . 0.969    no
C10 . H103 . 0.970    no
C101 . H1011 . 0.965    no
C101 . H1012 . 0.965    no
C101 . H1013 . 0.962    no
loop_
 _geom_angle_atom_site_label_1
 _geom_angle_site_symmetry_1
 _geom_angle_atom_site_label_2
 _geom_angle_site_symmetry_2
 _geom_angle_atom_site_label_3
 _geom_angle_site_symmetry_3
 _geom_angle
 _geom_angle_publ_flag
C1 . N1 . C8 . 126.64(12)    yes
C1 . N1 . H2 . 118.4(11)    no
C8 . N1 . H2 . 114.2(11)    no
C1 . N2 . C11 . 126.21(12)    yes
C1 . N2 . H1 . 120.1(11)    no
C11 . N2 . H1 . 113.6(11)    no
C14 . B1 . C20 . 104.59(9)    yes
C14 . B1 . C26 . 111.03(10)    yes
C20 . B1 . C26 . 114.41(9)    yes
C14 . B1 . C32 . 114.02(10)    yes
C20 . B1 . C32 . 108.43(9)    yes
C26 . B1 . C32 . 104.60(10)    yes
N2 . C1 . N1 . 120.16(12)    yes
N2 . C1 . C2 . 119.12(11)    yes
N1 . C1 . C2 . 120.71(12)    yes
C1 . C2 . C3 . 119.09(10)    yes
C1 . C2 . C7 . 120.95(11)    yes
C3 . C2 . C7 . 119.85(11)    yes
C2 . C3 . C4 . 119.73(12)    yes
C2 . C3 . H31 . 119.4    no
C4 . C3 . H31 . 120.9    no
C3 . C4 . C5 . 120.15(13)    yes
C3 . C4 . H41 . 118.5    no
C5 . C4 . H41 . 121.3    no
C4 . C5 . C6 . 120.11(13)    yes
C4 . C5 . H51 . 119.1    no
C6 . C5 . H51 . 120.8    no
C5 . C6 . C7 . 119.93(12)    yes
C5 . C6 . H61 . 119.4    no
C7 . C6 . H61 . 120.6    no
C2 . C7 . C6 . 120.18(13)    yes
C2 . C7 . H71 . 119.7    no
C6 . C7 . H71 . 120.1    no
N1 . C8 . C9 . 109.00(10)    yes
N1 . C8 . C10 . 108.94(9)    yes
C9 . C8 . C10 . 111.57(10)    yes
N1 . C8 . H81 . 109.0    no
C9 . C8 . H81 . 109.4    no
C10 . C8 . H81 . 108.9    no
N2 . C11 . C12 . 110.10(13)    yes
N2 . C11 . C13 . 108.30(13)    yes
C12 . C11 . C13 . 112.72(14)    yes
N2 . C11 . H111 . 108.0    no
C12 . C11 . H111 . 110.0    no
C13 . C11 . H111 . 107.6    no
C11 . C12 . H121 . 109.8    no
C11 . C12 . H122 . 109.1    no
H121 . C12 . H122 . 107.7    no
C11 . C12 . H123 . 109.9    no
H121 . C12 . H123 . 111.0    no
H122 . C12 . H123 . 109.3    no
C11 . C13 . H131 . 111.7    no
C11 . C13 . H132 . 107.1    no
H131 . C13 . H132 . 109.3    no
C11 . C13 . H133 . 108.2    no
H131 . C13 . H133 . 110.5    no
H132 . C13 . H133 . 109.9    no
B1 . C14 . C15 . 125.70(11)    yes
B1 . C14 . C19 . 119.27(12)    yes
C15 . C14 . C19 . 114.95(12)    yes
C14 . C15 . C16 . 122.39(15)    yes
C14 . C15 . H151 . 118.8    no
C16 . C15 . H151 . 118.8    no
C15 . C16 . C17 . 120.13(17)    yes
C15 . C16 . H161 . 119.0    no
C17 . C16 . H161 . 120.8    no
C16 . C17 . C18 . 119.38(14)    yes
C16 . C17 . H171 . 121.0    no
C18 . C17 . H171 . 119.7    no
C17 . C18 . C19 . 119.73(15)    yes
C17 . C18 . H181 . 120.0    no
C19 . C18 . H181 . 120.3    no
C14 . C19 . C18 . 123.39(15)    yes
C14 . C19 . H191 . 117.7    no
C18 . C19 . H191 . 118.9    no
B1 . C20 . C21 . 118.49(10)    yes
B1 . C20 . C25 . 126.39(11)    yes
C21 . C20 . C25 . 115.04(11)    yes
C20 . C21 . C22 . 123.09(12)    yes
C20 . C21 . H211 . 119.3    no
C22 . C21 . H211 . 117.6    no
C21 . C22 . C23 . 119.90(13)    yes
C21 . C22 . H221 . 117.9    no
C23 . C22 . H221 . 122.2    no
C22 . C23 . C24 . 118.85(11)    yes
C22 . C23 . H231 . 120.4    no
C24 . C23 . H231 . 120.8    no
C23 . C24 . C25 . 120.44(12)    yes
C23 . C24 . H241 . 121.0    no
C25 . C24 . H241 . 118.5    no
C20 . C25 . C24 . 122.65(12)    yes
C20 . C25 . H251 . 119.0    no
C24 . C25 . H251 . 118.4    no
B1 . C26 . C27 . 123.66(11)    yes
B1 . C26 . C31 . 122.03(11)    yes
C27 . C26 . C31 . 113.99(12)    yes
C26 . C27 . C28 . 123.02(12)    yes
C26 . C27 . H271 . 118.1    no
C28 . C27 . H271 . 118.9    no
C27 . C28 . C29 . 120.76(12)    yes
C27 . C28 . H281 . 120.7    no
C29 . C28 . H281 . 118.5    no
C28 . C29 . C30 . 118.19(13)    yes
C28 . C29 . H291 . 121.9    no
C30 . C29 . H291 . 119.9    no
C29 . C30 . C31 . 120.46(13)    yes
C29 . C30 . H301 . 119.5    no
C31 . C30 . H301 . 120.1    no
C26 . C31 . C30 . 123.55(12)    yes
C26 . C31 . H311 . 117.0    no
C30 . C31 . H311 . 119.4    no
B1 . C32 . C33 . 120.95(11)    yes
B1 . C32 . C37 . 123.72(10)    yes
C33 . C32 . C37 . 115.02(11)    yes
C32 . C33 . C34 . 122.74(12)    yes
C32 . C33 . H331 . 118.6    no
C34 . C33 . H331 . 118.7    no
C33 . C34 . C35 . 120.10(12)    yes
C33 . C34 . H341 . 119.0    no
C35 . C34 . H341 . 120.9    no
C34 . C35 . C36 . 119.10(11)    yes
C34 . C35 . H351 . 120.8    no
C36 . C35 . H351 . 120.2    no
C35 . C36 . C37 . 120.17(12)    yes
C35 . C36 . H361 . 119.8    no
C37 . C36 . H361 . 120.0    no
C32 . C37 . C36 . 122.85(11)    yes
C32 . C37 . H371 . 118.7    no
C36 . C37 . H371 . 118.4    no
C8 . C9 . H91 . 108.1    no
C8 . C9 . H92 . 108.0    no
H91 . C9 . H92 . 110.5    no
C8 . C9 . H93 . 108.6    no
H91 . C9 . H93 . 109.6    no
H92 . C9 . H93 . 112.0    no
C8 . C91 . H911 . 110.7    no
C8 . C91 . H912 . 109.5    no
H911 . C91 . H912 . 108.3    no
C8 . C91 . H913 . 109.4    no
H911 . C91 . H913 . 110.0    no
H912 . C91 . H913 . 109.0    no
C8 . C10 . H101 . 109.9    no
C8 . C10 . H102 . 109.1    no
H101 . C10 . H102 . 108.4    no
C8 . C10 . H103 . 109.6    no
H101 . C10 . H103 . 110.2    no
H102 . C10 . H103 . 109.7    no
C8 . C101 . H1011 . 111.2    no
C8 . C101 . H1012 . 110.3    no
H1011 . C101 . H1012 . 108.0    no
C8 . C101 . H1013 . 111.1    no
H1011 . C101 . H1013 . 108.4    no
H1012 . C101 . H1013 . 107.6    no

#===end

data_compound_36

# local code ADS290


_chemical_name_systematic         
;
Cp*Ti{PhC(NiPr)2}{h2-ON(H)B(C6F5)3}
;
_chemical_melting_point           ?


_publ_section_exptl_refinement 
;
The C bound H atoms were all located in a difference map, but those 
attached to carbon atoms were repositioned geometrically. 
then initially refined with soft restraints on the 
bond lengths and angles to regularise their geometry
after which the positions were refined in a riding model.

The N bound H atom was located in a Fourier difference map and 
positionally and isotropically refined subject to a 0.87(1) Ang 
N-H distance restraint. 

;
 
_cell_length_a                    13.2439(2)
_cell_length_b                    13.8026(3)
_cell_length_c                    24.0023(3)
_cell_angle_alpha                 90
_cell_angle_beta                  97.7434(15)
_cell_angle_gamma                 90
_cell_volume                      4347.59(13)
 
_symmetry_cell_setting            'monoclinic' 
_symmetry_space_group_name_H-M    'P 1 21/c 1 ' 
_symmetry_space_group_name_Hall   '-P 2ybc'  
loop_
 _symmetry_equiv_pos_as_xyz
 'x,y,z'
 '-x,-y,-z'
 '-x,y+1/2,-z+1/2'
 'x,-y+1/2,z+1/2'

loop_
_atom_type_symbol
_atom_type_scat_dispersion_real
_atom_type_scat_dispersion_imag
_atom_type_scat_Cromer_Mann_a1
_atom_type_scat_Cromer_Mann_b1
_atom_type_scat_Cromer_Mann_a2
_atom_type_scat_Cromer_Mann_b2
_atom_type_scat_Cromer_Mann_a3
_atom_type_scat_Cromer_Mann_b3
_atom_type_scat_Cromer_Mann_a4
_atom_type_scat_Cromer_Mann_b4
_atom_type_scat_Cromer_Mann_c
_atom_type_scat_source  
 C       0.0181   0.0091   2.3100  20.8439   1.0200  10.2075   1.5886   0.5687
   0.8650  51.6512   0.2156 'International Tables Vol C 4.2.6.8 and 6.1.1.4'
 H       0.0000   0.0000   0.4930  10.5109   0.3229  26.1257   0.1402   3.1424
   0.0408  57.7998   0.0030 'International Tables Vol C 4.2.6.8 and 6.1.1.4'
 B       0.0090   0.0039   2.0545  23.2185   1.3326   1.0210   1.0979  60.3498
   0.7068   0.1403  -0.1932 'International Tables Vol C 4.2.6.8 and 6.1.1.4'
 N       0.0311   0.0180  12.2126   0.0057   3.1322   9.8933   2.0125  28.9975
   1.1663   0.5826 -11.5290 'International Tables Vol C 4.2.6.8 and 6.1.1.4'
 O       0.0492   0.0322   3.0485  13.2771   2.2868   5.7011   1.5463   0.3239
   0.8670  32.9089   0.2508 'International Tables Vol C 4.2.6.8 and 6.1.1.4'
 F       0.0727   0.0534   3.5392  10.2825   2.6412   4.2944   1.5170   0.2615
   1.0243  26.1476   0.2776 'International Tables Vol C 4.2.6.8 and 6.1.1.4'
 Ti      0.2191   1.8069   9.7595   7.8508   7.3558   0.5000   1.6991  35.6338
   1.9021 116.1050   1.2807 'International Tables Vol C 4.2.6.8 and 6.1.1.4'
 
 
_cell_formula_units_Z                    4


_chemical_formula_sum             'C47 H41 B F15 N3 O Ti'
_chemical_formula_moiety          'C41 H35 B F15 N3 O Ti, C6 H6'
_chemical_compound_source                .
_chemical_formula_weight           1007.54
 
 
_cell_measurement_reflns_used        12021
_cell_measurement_theta_min              3
_cell_measurement_theta_max             76
_cell_measurement_temperature          150
 
_exptl_crystal_description        'block' 
_exptl_crystal_colour             'orange' 
_exptl_crystal_size_min           0.100 
_exptl_crystal_size_mid           0.100 
_exptl_crystal_size_max           0.100 
 
_exptl_crystal_density_diffrn     1.539 
_exptl_crystal_density_meas       ? 
_exptl_crystal_density_method     'not measured' 
_exptl_crystal_F_000              2056 
_exptl_absorpt_coefficient_mu     2.621 
 

_exptl_absorpt_correction_type    multi-scan 
_exptl_absorpt_process_details    'CrysAlis, (Oxford Diffraction, 2002)' 
_exptl_absorpt_correction_T_min   0.70 
_exptl_absorpt_correction_T_max   0.77 
_diffrn_measurement_device_type   'Oxford Diffraction SuperNova' 
_diffrn_measurement_device        'Area' 
_diffrn_radiation_monochromator   'graphite' 
_diffrn_radiation_type            'Cu K\a'
_diffrn_radiation_wavelength      1.54180
_diffrn_measurement_method        \w/2\q 
 
_computing_data_collection        'SuperNova, (Oxford Diffraction, 2010)' 
_computing_cell_refinement        'CrysAlis, (Oxford Diffraction, 2002)' 
_computing_data_reduction         'CrysAlis, (Oxford Diffraction, 2002)' 
_computing_structure_solution     'SIR92 (Altomare et al., 1994)' 
_computing_structure_refinement   'CRYSTALS (Betteridge et al., 2003)' 
_computing_publication_material   'CRYSTALS (Betteridge et al., 2003)' 
_computing_molecular_graphics     'CAMERON (Watkin et al., 1996)' 
 
_diffrn_standards_interval_time   . 
_diffrn_standards_interval_count  . 
_diffrn_standards_number          0 
_diffrn_standards_decay_%         ? 
 
_diffrn_ambient_temperature        150
_diffrn_reflns_number             25794 
_reflns_number_total              9016 
_diffrn_reflns_av_R_equivalents   0.026 
 
 
_diffrn_reflns_theta_min          3.368 
_diffrn_reflns_theta_max          76.430 
_diffrn_measured_fraction_theta_max 0.989 
 
_diffrn_reflns_theta_full         74.137 
_diffrn_measured_fraction_theta_full 0.998 
 
 
_diffrn_reflns_limit_h_min        -16 
_diffrn_reflns_limit_h_max        16 
_diffrn_reflns_limit_k_min        -17 
_diffrn_reflns_limit_k_max        16 
_diffrn_reflns_limit_l_min        -11 
_diffrn_reflns_limit_l_max        30 
_reflns_limit_h_min               -16 
_reflns_limit_h_max               16 
_reflns_limit_k_min               0 
_reflns_limit_k_max               17 
_reflns_limit_l_min               0 
_reflns_limit_l_max               30 
 
_oxford_diffrn_Wilson_B_factor    1.87 
_oxford_diffrn_Wilson_scale       0.05 
 

_atom_sites_solution_primary      direct #heavy,direct,difmap,geom
_atom_sites_solution_secondary  difmap
_atom_sites_solution_hydrogens    difmap
 

 
_refine_diff_density_min          -0.40 
_refine_diff_density_max          0.41 
 
 
# The current dictionary definitions do not cover the 
# situation where the reflections used for refinement were 
# selected by a user-defined sigma threshold 
 
 
# The values actually used during refinement 
_oxford_reflns_threshold_expression_ref     I>3.0\s(I)
_refine_ls_number_reflns          7642 
_refine_ls_number_restraints      1 
_refine_ls_number_parameters      617 
_oxford_refine_ls_R_factor_ref    0.0324 
_refine_ls_wR_factor_ref          0.0298 
_refine_ls_goodness_of_fit_ref    1.0518 
_refine_ls_shift/su_max           0.0015075 
_refine_ls_shift/su_mean          0.0000545 
 
 
# The values computed from all data 
_oxford_reflns_number_all         8979 
_refine_ls_R_factor_all           0.0388 
_refine_ls_wR_factor_all          0.0327 
 
# The values computed with a 2 sigma cutoff - a la SHELX 
_reflns_threshold_expression      I>2.0\s(I)
_reflns_number_gt                 8023 
_refine_ls_R_factor_gt            0.0341 
_refine_ls_wR_factor_gt           0.0305 
 
_chemical_absolute_configuration  '.' 
 
 
_refine_ls_structure_factor_coef  F 
_refine_ls_matrix_type            full
_refine_ls_hydrogen_treatment     mixed         
_refine_ls_weighting_scheme       calc 
_refine_ls_weighting_details 
;
 Method, part 1, Chebychev polynomial, (Watkin, 1994, Prince, 1982) 
 [weight] = 1.0/[A~0~*T~0~(x)+A~1~*T~1~(x) ... +A~n-1~]*T~n-1~(x)] 
 where A~i~ are the Chebychev coefficients listed below and x= Fcalc/Fmax 
 Method = Robust Weighting (Prince, 1982) 
 W = [weight] * [1-(deltaF/6*sigmaF)^2^]^2^ 
 A~i~ are: 
 7.95 -10.0 1.89 -1.33 -3.32 
;
_publ_section_references 
; 
Oxford Diffraction, (2010). CrysAlisPro. 
 
Oxford Diffraction, (2010). Supernova User Manual. 
 
Betteridge, P.W., Carruthers, J.R., Cooper, R.I., 
Prout, K. & Watkin, D.J. (2003). J. Appl. Cryst. 36, 1487. 
 
Watkin, D.J., Prout, C.K. & Pearce, L.J. (1996). CAMERON, Chemical 
Crystallography Laboratory, Oxford, UK. 
 
Altomare, A., Cascarano, G., Giacovazzo, C., Guagliardi, A., Burla, M.C., 
Polidori, G. & Camalli, M. (1994). J. Appl. Cryst. 27, 435. 
 
Watkin D.J. (1994). 
Acta Cryst, A50, 411-437. 
 
Prince, E. 
Mathematical Techniques in Crystallography 
and Materials Science 
Springer-Verlag, New York, 1982. 
; 

# Uequiv = arithmetic mean of Ui i.e. Ueqiv = (U1+U2+U3)/3


loop_
_atom_site_label
_atom_site_type_symbol
_atom_site_fract_x
_atom_site_fract_y
_atom_site_fract_z
_atom_site_U_iso_or_equiv
_atom_site_occupancy
_atom_site_adp_type
_atom_site_refinement_flags_posn
_atom_site_refinement_flags_adp
_atom_site_refinement_flags_occupancy
_atom_site_disorder_assembly
_atom_site_disorder_group
_atom_site_attached_hydrogens
Ti1 Ti 0.816205(17) 0.297803(17) 0.333901(9) 0.0179 1.0000 Uani . . . . . . 
N1 N 0.75989(8) 0.15579(8) 0.34438(5) 0.0210 1.0000 Uani D . . . . . 
N2 N 0.97468(8) 0.25743(8) 0.33750(5) 0.0204 1.0000 Uani . . . . . . 
N3 N 0.89825(9) 0.28397(8) 0.41262(5) 0.0216 1.0000 Uani . . . . . . 
O1 O 0.69769(7) 0.23957(7) 0.35062(4) 0.0254 1.0000 Uani . . . . . . 
B1 B 0.69900(11) 0.07313(11) 0.30834(6) 0.0200 1.0000 Uani . . . . . . 
F1 F 0.79881(6) 0.23195(6) 0.24554(3) 0.0263 1.0000 Uani . . . . . . 
F2 F 0.82538(8) 0.22674(8) 0.13881(4) 0.0400 1.0000 Uani . . . . . . 
F3 F 0.75694(8) 0.07323(9) 0.07189(4) 0.0444 1.0000 Uani . . . . . . 
F4 F 0.65705(8) -0.07412(7) 0.11604(4) 0.0398 1.0000 Uani . . . . . . 
F5 F 0.63014(7) -0.07238(7) 0.22398(4) 0.0334 1.0000 Uani . . . . . . 
F6 F 0.62293(7) 0.03410(7) 0.41335(4) 0.0324 1.0000 Uani . . . . . . 
F7 F 0.43282(7) 0.05495(8) 0.43662(4) 0.0414 1.0000 Uani . . . . . . 
F8 F 0.28390(7) 0.12447(10) 0.35717(5) 0.0504 1.0000 Uani . . . . . . 
F9 F 0.32965(8) 0.16946(10) 0.25324(5) 0.0518 1.0000 Uani . . . . . . 
F10 F 0.51648(7) 0.14498(7) 0.22774(4) 0.0356 1.0000 Uani . . . . . . 
F11 F 0.91668(6) 0.03543(7) 0.33836(4) 0.0314 1.0000 Uani . . . . . . 
F12 F 1.00575(7) -0.13034(8) 0.37493(4) 0.0393 1.0000 Uani . . . . . . 
F13 F 0.89060(8) -0.29291(7) 0.38364(4) 0.0423 1.0000 Uani . . . . . . 
F14 F 0.68653(8) -0.28231(7) 0.36239(4) 0.0385 1.0000 Uani . . . . . . 
F15 F 0.59435(6) -0.11831(6) 0.32899(4) 0.0314 1.0000 Uani . . . . . . 
C1 C 0.98336(10) 0.25394(10) 0.39303(6) 0.0208 1.0000 Uani . . . . . . 
C2 C 1.07888(10) 0.22202(11) 0.42977(6) 0.0246 1.0000 Uani . . . . . . 
C3 C 1.09553(12) 0.12503(12) 0.44331(7) 0.0327 1.0000 Uani . . . . . . 
C4 C 1.18455(14) 0.09727(15) 0.47755(7) 0.0431 1.0000 Uani . . . . . . 
C5 C 1.25676(13) 0.16525(16) 0.49719(7) 0.0434 1.0000 Uani . . . . . . 
C6 C 1.24127(12) 0.26144(16) 0.48306(7) 0.0415 1.0000 Uani . . . . . . 
C7 C 1.15259(12) 0.29003(12) 0.44940(7) 0.0321 1.0000 Uani . . . . . . 
C8 C 1.06043(10) 0.22697(10) 0.30793(6) 0.0233 1.0000 Uani . . . . . . 
C9 C 1.02221(12) 0.18350(11) 0.25078(6) 0.0289 1.0000 Uani . . . . . . 
C10 C 1.13403(12) 0.31022(12) 0.30133(7) 0.0315 1.0000 Uani . . . . . . 
C11 C 0.87529(11) 0.27921(12) 0.47086(6) 0.0281 1.0000 Uani . . . . . . 
C12 C 0.95126(14) 0.33280(16) 0.51321(7) 0.0447 1.0000 Uani . . . . . . 
C13 C 0.85883(16) 0.17594(14) 0.49065(7) 0.0438 1.0000 Uani . . . . . . 
C14 C 0.69897(11) 0.43048(10) 0.33050(6) 0.0275 1.0000 Uani . . . . . . 
C15 C 0.72420(11) 0.41390(10) 0.27584(6) 0.0261 1.0000 Uani . . . . . . 
C16 C 0.82942(11) 0.43631(10) 0.27648(6) 0.0237 1.0000 Uani . . . . . . 
C17 C 0.86908(11) 0.46398(9) 0.33197(6) 0.0234 1.0000 Uani . . . . . . 
C18 C 0.78789(11) 0.46124(10) 0.36516(6) 0.0256 1.0000 Uani . . . . . . 
C19 C 0.59455(12) 0.42211(13) 0.34725(8) 0.0392 1.0000 Uani . . . . . . 
C20 C 0.64979(13) 0.38305(13) 0.22620(7) 0.0372 1.0000 Uani . . . . . . 
C21 C 0.88468(13) 0.43661(11) 0.22593(6) 0.0308 1.0000 Uani . . . . . . 
C22 C 0.97559(11) 0.49543(11) 0.35328(7) 0.0294 1.0000 Uani . . . . . . 
C23 C 0.79147(14) 0.49809(12) 0.42414(7) 0.0363 1.0000 Uani . . . . . . 
C24 C 0.71462(10) 0.07789(10) 0.24149(6) 0.0205 1.0000 Uani . . . . . . 
C25 C 0.76309(10) 0.15042(10) 0.21583(6) 0.0225 1.0000 Uani . . . . . . 
C26 C 0.77818(11) 0.15164(12) 0.15988(6) 0.0281 1.0000 Uani . . . . . . 
C27 C 0.74334(11) 0.07508(13) 0.12607(6) 0.0308 1.0000 Uani . . . . . . 
C28 C 0.69285(11) 0.00002(12) 0.14881(6) 0.0286 1.0000 Uani . . . . . . 
C29 C 0.68021(10) 0.00284(10) 0.20486(6) 0.0248 1.0000 Uani . . . . . . 
C30 C 0.57960(10) 0.08490(10) 0.31879(6) 0.0219 1.0000 Uani . . . . . . 
C31 C 0.55187(10) 0.06627(10) 0.37142(6) 0.0248 1.0000 Uani . . . . . . 
C32 C 0.45454(11) 0.07835(11) 0.38539(6) 0.0287 1.0000 Uani . . . . . . 
C33 C 0.37924(11) 0.11370(13) 0.34526(7) 0.0330 1.0000 Uani . . . . . . 
C34 C 0.40240(11) 0.13576(12) 0.29279(7) 0.0323 1.0000 Uani . . . . . . 
C35 C 0.50100(11) 0.12107(10) 0.28060(6) 0.0252 1.0000 Uani . . . . . . 
C36 C 0.75008(10) -0.03046(10) 0.33236(6) 0.0217 1.0000 Uani . . . . . . 
C37 C 0.85518(10) -0.04123(11) 0.34468(6) 0.0241 1.0000 Uani . . . . . . 
C38 C 0.90376(11) -0.12650(12) 0.36276(6) 0.0284 1.0000 Uani . . . . . . 
C39 C 0.84657(12) -0.20840(11) 0.36782(6) 0.0293 1.0000 Uani . . . . . . 
C40 C 0.74213(12) -0.20298(11) 0.35635(6) 0.0278 1.0000 Uani . . . . . . 
C41 C 0.69652(11) -0.11566(10) 0.33932(6) 0.0244 1.0000 Uani . . . . . . 
C42 C 0.43431(18) -0.19977(18) 0.42584(9) 0.0569 1.0000 Uani . . . . . . 
C43 C 0.47477(17) -0.28404(19) 0.40923(8) 0.0594 1.0000 Uani . . . . . . 
C44 C 0.49507(17) -0.35902(18) 0.44711(11) 0.0598 1.0000 Uani . . . . . . 
C45 C 0.47321(17) -0.34896(17) 0.50183(9) 0.0548 1.0000 Uani . . . . . . 
C46 C 0.42985(18) -0.26386(17) 0.51734(8) 0.0524 1.0000 Uani . . . . . . 
C47 C 0.41148(18) -0.18924(17) 0.47941(9) 0.0546 1.0000 Uani . . . . . . 
H31 H 1.0461 0.0781 0.4293 0.0404 1.0000 Uiso R . . . . . 
H41 H 1.1953 0.0305 0.4863 0.0540 1.0000 Uiso R . . . . . 
H51 H 1.3182 0.1443 0.5208 0.0528 1.0000 Uiso R . . . . . 
H61 H 1.2909 0.3090 0.4957 0.0508 1.0000 Uiso R . . . . . 
H71 H 1.1418 0.3567 0.4399 0.0393 1.0000 Uiso R . . . . . 
H81 H 1.0979 0.1756 0.3310 0.0284 1.0000 Uiso R . . . . . 
H93 H 1.0804 0.1577 0.2345 0.0429 1.0000 Uiso R . . . . . 
H92 H 0.9875 0.2342 0.2249 0.0435 1.0000 Uiso R . . . . . 
H91 H 0.9731 0.1298 0.2550 0.0437 1.0000 Uiso R . . . . . 
H101 H 1.1893 0.2843 0.2831 0.0489 1.0000 Uiso R . . . . . 
H102 H 1.1621 0.3378 0.3384 0.0488 1.0000 Uiso R . . . . . 
H103 H 1.0968 0.3616 0.2777 0.0490 1.0000 Uiso R . . . . . 
H111 H 0.8070 0.3119 0.4703 0.0349 1.0000 Uiso R . . . . . 
H121 H 0.9244 0.3391 0.5492 0.0676 1.0000 Uiso R . . . . . 
H122 H 1.0152 0.2955 0.5195 0.0675 1.0000 Uiso R . . . . . 
H123 H 0.9659 0.3975 0.5000 0.0685 1.0000 Uiso R . . . . . 
H133 H 0.8391 0.1803 0.5296 0.0679 1.0000 Uiso R . . . . . 
H132 H 0.9230 0.1394 0.4922 0.0694 1.0000 Uiso R . . . . . 
H131 H 0.8041 0.1428 0.4648 0.0692 1.0000 Uiso R . . . . . 
H191 H 0.5990 0.4103 0.3872 0.0615 1.0000 Uiso R . . . . . 
H192 H 0.5572 0.4828 0.3386 0.0613 1.0000 Uiso R . . . . . 
H193 H 0.5590 0.3673 0.3281 0.0616 1.0000 Uiso R . . . . . 
H203 H 0.6851 0.3734 0.1942 0.0578 1.0000 Uiso R . . . . . 
H202 H 0.5979 0.4325 0.2183 0.0574 1.0000 Uiso R . . . . . 
H201 H 0.6178 0.3215 0.2347 0.0572 1.0000 Uiso R . . . . . 
H213 H 0.9579 0.4371 0.2378 0.0492 1.0000 Uiso R . . . . . 
H212 H 0.8672 0.4940 0.2039 0.0486 1.0000 Uiso R . . . . . 
H211 H 0.8683 0.3790 0.2025 0.0483 1.0000 Uiso R . . . . . 
H221 H 1.0018 0.4581 0.3868 0.0462 1.0000 Uiso R . . . . . 
H222 H 0.9782 0.5635 0.3631 0.0455 1.0000 Uiso R . . . . . 
H223 H 1.0206 0.4861 0.3241 0.0460 1.0000 Uiso R . . . . . 
H233 H 0.8610 0.4923 0.4432 0.0561 1.0000 Uiso R . . . . . 
H232 H 0.7705 0.5648 0.4212 0.0570 1.0000 Uiso R . . . . . 
H231 H 0.7459 0.4596 0.4437 0.0555 1.0000 Uiso R . . . . . 
H421 H 0.4224 -0.1461 0.3991 0.0708 1.0000 Uiso R . . . . . 
H431 H 0.4896 -0.2898 0.3720 0.0706 1.0000 Uiso R . . . . . 
H441 H 0.5247 -0.4165 0.4365 0.0729 1.0000 Uiso R . . . . . 
H451 H 0.4885 -0.4008 0.5283 0.0678 1.0000 Uiso R . . . . . 
H461 H 0.4129 -0.2568 0.5546 0.0634 1.0000 Uiso R . . . . . 
H471 H 0.3841 -0.1288 0.4905 0.0667 1.0000 Uiso R . . . . . 
H1 H 0.7819(14) 0.1356(14) 0.3790(5) 0.035(5) 1.0000 Uiso D . . . . . 
loop_
_atom_site_aniso_label
_atom_site_aniso_U_11
_atom_site_aniso_U_22
_atom_site_aniso_U_33
_atom_site_aniso_U_23
_atom_site_aniso_U_13
_atom_site_aniso_U_12
Ti1 0.01849(11) 0.01761(11) 0.01759(11) -0.00032(8) 0.00222(8) -0.00047(8) 
N1 0.0212(5) 0.0189(5) 0.0229(5) -0.0004(4) 0.0024(4) 0.0014(4) 
N2 0.0186(5) 0.0220(5) 0.0207(5) -0.0004(4) 0.0029(4) 0.0017(4) 
N3 0.0222(5) 0.0243(5) 0.0182(5) -0.0004(4) 0.0018(4) 0.0023(4) 
O1 0.0228(5) 0.0215(5) 0.0330(5) -0.0034(4) 0.0077(4) 0.0019(4) 
B1 0.0190(7) 0.0197(7) 0.0212(7) -0.0013(5) 0.0029(5) -0.0009(5) 
F1 0.0327(4) 0.0236(4) 0.0228(4) -0.0002(3) 0.0037(3) -0.0059(3) 
F2 0.0470(5) 0.0489(6) 0.0255(4) 0.0023(4) 0.0099(4) -0.0165(5) 
F3 0.0465(6) 0.0661(7) 0.0220(4) -0.0103(4) 0.0099(4) -0.0099(5) 
F4 0.0445(5) 0.0410(5) 0.0320(5) -0.0153(4) -0.0018(4) -0.0033(4) 
F5 0.0384(5) 0.0295(4) 0.0304(4) -0.0018(3) -0.0022(4) -0.0109(4) 
F6 0.0277(4) 0.0460(5) 0.0238(4) 0.0057(4) 0.0040(3) 0.0078(4) 
F7 0.0358(5) 0.0588(6) 0.0328(5) 0.0065(4) 0.0165(4) 0.0051(4) 
F8 0.0223(4) 0.0817(8) 0.0496(6) 0.0029(6) 0.0134(4) 0.0129(5) 
F9 0.0290(5) 0.0832(8) 0.0421(6) 0.0122(6) 0.0012(4) 0.0247(5) 
F10 0.0301(4) 0.0489(6) 0.0281(4) 0.0124(4) 0.0049(3) 0.0113(4) 
F11 0.0198(4) 0.0322(4) 0.0426(5) 0.0021(4) 0.0053(3) -0.0016(3) 
F12 0.0228(4) 0.0492(6) 0.0453(5) 0.0092(4) 0.0026(4) 0.0127(4) 
F13 0.0483(6) 0.0331(5) 0.0445(6) 0.0117(4) 0.0026(4) 0.0181(4) 
F14 0.0481(6) 0.0230(4) 0.0438(5) 0.0070(4) 0.0038(4) -0.0028(4) 
F15 0.0223(4) 0.0266(4) 0.0440(5) 0.0050(4) -0.0001(3) -0.0037(3) 
C1 0.0213(6) 0.0189(6) 0.0219(6) -0.0004(5) 0.0015(5) -0.0009(5) 
C2 0.0213(6) 0.0324(7) 0.0199(6) -0.0003(5) 0.0021(5) 0.0035(5) 
C3 0.0321(8) 0.0336(8) 0.0315(8) 0.0047(6) 0.0013(6) 0.0053(6) 
C4 0.0416(9) 0.0519(11) 0.0348(9) 0.0119(8) 0.0018(7) 0.0187(8) 
C5 0.0291(8) 0.0733(13) 0.0266(8) 0.0005(8) -0.0007(6) 0.0187(8) 
C6 0.0244(7) 0.0667(12) 0.0320(8) -0.0124(8) -0.0011(6) 0.0002(8) 
C7 0.0259(7) 0.0384(9) 0.0314(8) -0.0044(6) 0.0016(6) 0.0001(6) 
C8 0.0224(6) 0.0242(7) 0.0239(7) 0.0006(5) 0.0058(5) 0.0036(5) 
C9 0.0310(7) 0.0309(7) 0.0262(7) -0.0040(6) 0.0085(6) 0.0040(6) 
C10 0.0263(7) 0.0347(8) 0.0351(8) -0.0016(6) 0.0099(6) -0.0025(6) 
C11 0.0271(7) 0.0380(8) 0.0193(6) -0.0016(6) 0.0037(5) 0.0027(6) 
C12 0.0362(9) 0.0733(13) 0.0240(7) -0.0153(8) 0.0019(6) -0.0016(9) 
C13 0.0538(11) 0.0478(10) 0.0318(8) 0.0123(8) 0.0128(8) 0.0027(8) 
C14 0.0268(7) 0.0227(7) 0.0331(7) 0.0020(6) 0.0042(6) 0.0056(5) 
C15 0.0269(7) 0.0214(6) 0.0285(7) 0.0034(5) -0.0017(6) 0.0031(5) 
C16 0.0282(7) 0.0179(6) 0.0246(7) 0.0042(5) 0.0023(5) 0.0006(5) 
C17 0.0286(7) 0.0150(6) 0.0259(7) 0.0004(5) 0.0019(5) 0.0006(5) 
C18 0.0304(7) 0.0192(6) 0.0275(7) -0.0003(5) 0.0045(6) 0.0043(5) 
C19 0.0279(8) 0.0371(9) 0.0539(10) 0.0040(8) 0.0101(7) 0.0069(7) 
C20 0.0354(8) 0.0335(8) 0.0381(9) 0.0033(7) -0.0116(7) 0.0015(7) 
C21 0.0398(8) 0.0272(7) 0.0264(7) 0.0035(6) 0.0088(6) -0.0018(6) 
C22 0.0293(7) 0.0215(7) 0.0360(8) -0.0018(6) -0.0006(6) -0.0031(6) 
C23 0.0510(10) 0.0294(8) 0.0295(8) -0.0047(6) 0.0095(7) 0.0048(7) 
C24 0.0172(6) 0.0221(6) 0.0217(6) -0.0007(5) 0.0012(5) 0.0026(5) 
C25 0.0202(6) 0.0244(7) 0.0225(6) -0.0025(5) 0.0014(5) 0.0011(5) 
C26 0.0251(7) 0.0361(8) 0.0234(7) 0.0029(6) 0.0050(5) -0.0020(6) 
C27 0.0268(7) 0.0462(9) 0.0199(7) -0.0040(6) 0.0046(5) 0.0021(6) 
C28 0.0266(7) 0.0319(7) 0.0261(7) -0.0089(6) -0.0015(5) 0.0028(6) 
C29 0.0222(6) 0.0243(7) 0.0270(7) -0.0005(6) 0.0004(5) 0.0012(5) 
C30 0.0201(6) 0.0193(6) 0.0263(7) -0.0009(5) 0.0035(5) -0.0006(5) 
C31 0.0225(6) 0.0260(7) 0.0257(7) 0.0005(5) 0.0026(5) 0.0022(5) 
C32 0.0266(7) 0.0334(8) 0.0280(7) -0.0008(6) 0.0107(6) 0.0005(6) 
C33 0.0192(7) 0.0417(9) 0.0393(8) -0.0025(7) 0.0090(6) 0.0045(6) 
C34 0.0233(7) 0.0397(9) 0.0332(8) 0.0021(6) 0.0007(6) 0.0095(6) 
C35 0.0246(7) 0.0258(7) 0.0256(7) 0.0018(5) 0.0044(5) 0.0023(5) 
C36 0.0213(6) 0.0243(6) 0.0195(6) -0.0001(5) 0.0020(5) 0.0022(5) 
C37 0.0224(6) 0.0274(7) 0.0227(6) 0.0003(5) 0.0041(5) 0.0004(5) 
C38 0.0234(7) 0.0394(8) 0.0224(7) 0.0015(6) 0.0025(5) 0.0106(6) 
C39 0.0371(8) 0.0280(7) 0.0226(7) 0.0045(6) 0.0035(6) 0.0121(6) 
C40 0.0365(8) 0.0234(7) 0.0236(7) 0.0025(5) 0.0042(6) 0.0019(6) 
C41 0.0227(6) 0.0255(7) 0.0243(7) 0.0000(5) 0.0012(5) 0.0011(5) 
C42 0.0628(13) 0.0686(15) 0.0363(10) 0.0043(10) -0.0041(9) -0.0129(11) 
C43 0.0567(12) 0.0911(17) 0.0320(9) -0.0140(10) 0.0123(8) -0.0323(12) 
C44 0.0452(11) 0.0632(14) 0.0726(15) -0.0258(12) 0.0144(10) -0.0067(10) 
C45 0.0596(13) 0.0533(12) 0.0510(11) 0.0062(9) 0.0057(10) -0.0041(10) 
C46 0.0669(13) 0.0578(12) 0.0345(9) -0.0047(9) 0.0144(9) -0.0098(10) 
C47 0.0594(13) 0.0540(12) 0.0504(11) -0.0031(9) 0.0079(10) -0.0004(10) 

_refine_ls_extinction_method 
    'None'
_oxford_refine_ls_scale 3.850(2) 
loop_
 _geom_bond_atom_site_label_1
 _geom_bond_site_symmetry_1
 _geom_bond_atom_site_label_2
 _geom_bond_site_symmetry_2
 _geom_bond_distance
 _geom_bond_publ_flag
Ti1 . N1 . 2.1242(12)    yes
Ti1 . N2 . 2.1620(11)    yes
Ti1 . N3 . 2.0576(11)    yes
Ti1 . O1 . 1.8549(10)    yes
Ti1 . F1 . 2.2903(8)    yes
Ti1 . C14 . 2.3951(14)    yes
Ti1 . C15 . 2.3530(14)    yes
Ti1 . C16 . 2.3770(13)    yes
Ti1 . C17 . 2.4004(13)    yes
Ti1 . C18 . 2.4225(14)    yes
N1 . O1 . 1.4392(14)    yes
N1 . B1 . 1.5850(18)    yes
N1 . H1 . 0.888(9)    no
N2 . C1 . 1.3231(18)    yes
N2 . C8 . 1.4790(17)    yes
N3 . C1 . 1.3438(18)    yes
N3 . C11 . 1.4717(17)    yes
B1 . C24 . 1.6466(19)    yes
B1 . C30 . 1.6422(19)    yes
B1 . C36 . 1.652(2)    yes
F1 . C25 . 1.3814(16)    yes
F2 . C26 . 1.3440(18)    yes
F3 . C27 . 1.3369(17)    yes
F4 . C28 . 1.3379(17)    yes
F5 . C29 . 1.3455(17)    yes
F6 . C31 . 1.3565(16)    yes
F7 . C32 . 1.3396(17)    yes
F8 . C33 . 1.3399(17)    yes
F9 . C34 . 1.3413(18)    yes
F10 . C35 . 1.3532(16)    yes
F11 . C37 . 1.3562(17)    yes
F12 . C38 . 1.3441(17)    yes
F13 . C39 . 1.3361(17)    yes
F14 . C40 . 1.3382(18)    yes
F15 . C41 . 1.3428(16)    yes
C1 . C2 . 1.5073(18)    yes
C2 . C3 . 1.388(2)    yes
C2 . C7 . 1.390(2)    yes
C3 . C4 . 1.397(2)    yes
C3 . H31 . 0.949    no
C4 . C5 . 1.377(3)    yes
C4 . H41 . 0.952    no
C5 . C6 . 1.379(3)    yes
C5 . H51 . 0.970    no
C6 . C7 . 1.390(2)    yes
C6 . H61 . 0.950    no
C7 . H71 . 0.954    no
C8 . C9 . 1.520(2)    yes
C8 . C10 . 1.529(2)    yes
C8 . H81 . 0.991    no
C9 . H93 . 0.978    no
C9 . H92 . 1.004    no
C9 . H91 . 1.000    no
C10 . H101 . 0.971    no
C10 . H102 . 0.993    no
C10 . H103 . 0.996    no
C11 . C12 . 1.522(2)    yes
C11 . C13 . 1.527(2)    yes
C11 . H111 . 1.010    no
C12 . H121 . 0.981    no
C12 . H122 . 0.985    no
C12 . H123 . 0.977    no
C13 . H133 . 1.005    no
C13 . H132 . 0.985    no
C13 . H131 . 0.999    no
C14 . C15 . 1.415(2)    yes
C14 . C18 . 1.413(2)    yes
C14 . C19 . 1.496(2)    yes
C15 . C16 . 1.425(2)    yes
C15 . C20 . 1.502(2)    yes
C16 . C17 . 1.417(2)    yes
C16 . C21 . 1.499(2)    yes
C17 . C18 . 1.422(2)    yes
C17 . C22 . 1.4985(19)    yes
C18 . C23 . 1.499(2)    yes
C19 . H191 . 0.967    no
C19 . H192 . 0.980    no
C19 . H193 . 0.973    no
C20 . H203 . 0.962    no
C20 . H202 . 0.970    no
C20 . H201 . 0.983    no
C21 . H213 . 0.973    no
C21 . H212 . 0.963    no
C21 . H211 . 0.981    no
C22 . H221 . 0.978    no
C22 . H222 . 0.968    no
C22 . H223 . 0.988    no
C23 . H233 . 0.975    no
C23 . H232 . 0.962    no
C23 . H231 . 0.972    no
C24 . C25 . 1.3785(19)    yes
C24 . C29 . 1.3950(19)    yes
C25 . C26 . 1.3841(19)    yes
C26 . C27 . 1.374(2)    yes
C27 . C28 . 1.384(2)    yes
C28 . C29 . 1.378(2)    yes
C30 . C31 . 1.386(2)    yes
C30 . C35 . 1.3842(19)    yes
C31 . C32 . 1.385(2)    yes
C32 . C33 . 1.379(2)    yes
C33 . C34 . 1.370(2)    yes
C34 . C35 . 1.391(2)    yes
C36 . C37 . 1.3913(19)    yes
C36 . C41 . 1.395(2)    yes
C37 . C38 . 1.383(2)    yes
C38 . C39 . 1.375(2)    yes
C39 . C40 . 1.376(2)    yes
C40 . C41 . 1.385(2)    yes
C42 . C43 . 1.363(3)    yes
C42 . C47 . 1.368(3)    yes
C42 . H421 . 0.978    no
C43 . C44 . 1.380(4)    yes
C43 . H431 . 0.943    no
C44 . C45 . 1.390(3)    yes
C44 . H441 . 0.936    no
C45 . C46 . 1.381(3)    yes
C45 . H451 . 0.959    no
C46 . C47 . 1.374(3)    yes
C46 . H461 . 0.955    no
C47 . H471 . 0.961    no
loop_
 _geom_angle_atom_site_label_1
 _geom_angle_site_symmetry_1
 _geom_angle_atom_site_label_2
 _geom_angle_site_symmetry_2
 _geom_angle_atom_site_label_3
 _geom_angle_site_symmetry_3
 _geom_angle
 _geom_angle_publ_flag
N1 . Ti1 . N2 . 96.43(4)    yes
N1 . Ti1 . N3 . 87.48(5)    yes
N2 . Ti1 . N3 . 63.23(4)    yes
N1 . Ti1 . O1 . 41.72(4)    yes
N2 . Ti1 . O1 . 136.46(4)    yes
N3 . Ti1 . O1 . 96.82(5)    yes
N1 . Ti1 . F1 . 75.54(4)    yes
N2 . Ti1 . F1 . 84.88(4)    yes
N3 . Ti1 . F1 . 142.02(4)    yes
O1 . Ti1 . F1 . 92.63(4)    yes
N1 . Ti1 . C14 . 118.24(5)    yes
N2 . Ti1 . C14 . 145.06(5)    yes
N3 . Ti1 . C14 . 111.22(5)    yes
O1 . Ti1 . C14 . 77.01(5)    yes
F1 . Ti1 . C14 . 106.74(4)    yes
N1 . Ti1 . C15 . 122.44(5)    yes
N2 . Ti1 . C15 . 128.44(5)    yes
N3 . Ti1 . C15 . 140.74(5)    yes
O1 . Ti1 . C15 . 92.15(5)    yes
F1 . Ti1 . C15 . 75.07(4)    yes
N1 . Ti1 . C16 . 149.91(5)    yes
N2 . Ti1 . C16 . 94.79(5)    yes
N3 . Ti1 . C16 . 122.41(5)    yes
O1 . Ti1 . C16 . 127.19(5)    yes
F1 . Ti1 . C16 . 77.78(4)    yes
N1 . Ti1 . C17 . 172.74(5)    yes
N2 . Ti1 . C17 . 87.87(5)    yes
N3 . Ti1 . C17 . 89.26(5)    yes
O1 . Ti1 . C17 . 132.52(5)    yes
F1 . Ti1 . C17 . 110.77(4)    yes
N1 . Ti1 . C18 . 138.69(5)    yes
N2 . Ti1 . C18 . 114.68(5)    yes
N3 . Ti1 . C18 . 83.49(5)    yes
O1 . Ti1 . C18 . 99.54(5)    yes
F1 . Ti1 . C18 . 130.99(4)    yes
C14 . Ti1 . C15 . 34.67(5)    yes
C14 . Ti1 . C16 . 57.54(5)    yes
C15 . Ti1 . C16 . 35.08(5)    yes
C14 . Ti1 . C17 . 57.20(5)    yes
C15 . Ti1 . C17 . 57.79(5)    yes
C16 . Ti1 . C17 . 34.50(5)    yes
C14 . Ti1 . C18 . 34.09(5)    yes
C15 . Ti1 . C18 . 57.31(5)    yes
C16 . Ti1 . C18 . 57.13(5)    yes
C17 . Ti1 . C18 . 34.30(5)    yes
Ti1 . N1 . O1 . 59.07(6)    yes
Ti1 . N1 . B1 . 139.51(9)    yes
O1 . N1 . B1 . 112.26(10)    yes
Ti1 . N1 . H1 . 108.9(13)    no
O1 . N1 . H1 . 105.9(13)    no
B1 . N1 . H1 . 111.4(13)    no
Ti1 . N2 . C1 . 90.10(8)    yes
Ti1 . N2 . C8 . 149.10(9)    yes
C1 . N2 . C8 . 120.33(11)    yes
Ti1 . N3 . C1 . 94.10(8)    yes
Ti1 . N3 . C11 . 136.49(9)    yes
C1 . N3 . C11 . 127.51(12)    yes
N1 . O1 . Ti1 . 79.21(6)    yes
N1 . B1 . C24 . 112.44(11)    yes
N1 . B1 . C30 . 105.97(10)    yes
C24 . B1 . C30 . 113.26(11)    yes
N1 . B1 . C36 . 106.15(10)    yes
C24 . B1 . C36 . 105.98(10)    yes
C30 . B1 . C36 . 112.94(11)    yes
Ti1 . F1 . C25 . 141.83(8)    yes
N3 . C1 . N2 . 112.21(12)    yes
N3 . C1 . C2 . 124.26(12)    yes
N2 . C1 . C2 . 123.52(12)    yes
C1 . C2 . C3 . 120.88(13)    yes
C1 . C2 . C7 . 119.77(13)    yes
C3 . C2 . C7 . 119.33(14)    yes
C2 . C3 . C4 . 119.81(16)    yes
C2 . C3 . H31 . 119.7    no
C4 . C3 . H31 . 120.5    no
C3 . C4 . C5 . 120.45(17)    yes
C3 . C4 . H41 . 119.0    no
C5 . C4 . H41 . 120.5    no
C4 . C5 . C6 . 119.91(15)    yes
C4 . C5 . H51 . 119.1    no
C6 . C5 . H51 . 121.0    no
C5 . C6 . C7 . 120.16(17)    yes
C5 . C6 . H61 . 120.9    no
C7 . C6 . H61 . 118.9    no
C2 . C7 . C6 . 120.33(16)    yes
C2 . C7 . H71 . 119.6    no
C6 . C7 . H71 . 120.1    no
N2 . C8 . C9 . 111.19(11)    yes
N2 . C8 . C10 . 112.18(11)    yes
C9 . C8 . C10 . 110.04(12)    yes
N2 . C8 . H81 . 107.1    no
C9 . C8 . H81 . 107.7    no
C10 . C8 . H81 . 108.5    no
C8 . C9 . H93 . 108.7    no
C8 . C9 . H92 . 110.6    no
H93 . C9 . H92 . 109.0    no
C8 . C9 . H91 . 110.1    no
H93 . C9 . H91 . 109.2    no
H92 . C9 . H91 . 109.2    no
C8 . C10 . H101 . 107.5    no
C8 . C10 . H102 . 111.2    no
H101 . C10 . H102 . 109.4    no
C8 . C10 . H103 . 108.7    no
H101 . C10 . H103 . 110.5    no
H102 . C10 . H103 . 109.5    no
N3 . C11 . C12 . 114.21(13)    yes
N3 . C11 . C13 . 113.17(13)    yes
C12 . C11 . C13 . 110.80(15)    yes
N3 . C11 . H111 . 105.5    no
C12 . C11 . H111 . 107.6    no
C13 . C11 . H111 . 104.8    no
C11 . C12 . H121 . 110.2    no
C11 . C12 . H122 . 109.0    no
H121 . C12 . H122 . 108.6    no
C11 . C12 . H123 . 111.7    no
H121 . C12 . H123 . 108.4    no
H122 . C12 . H123 . 108.9    no
C11 . C13 . H133 . 107.4    no
C11 . C13 . H132 . 109.4    no
H133 . C13 . H132 . 109.0    no
C11 . C13 . H131 . 110.9    no
H133 . C13 . H131 . 110.2    no
H132 . C13 . H131 . 109.9    no
Ti1 . C14 . C15 . 71.04(8)    yes
Ti1 . C14 . C18 . 74.02(8)    yes
C15 . C14 . C18 . 108.21(13)    yes
Ti1 . C14 . C19 . 123.39(10)    yes
C15 . C14 . C19 . 125.37(14)    yes
C18 . C14 . C19 . 126.33(15)    yes
Ti1 . C15 . C14 . 74.29(8)    yes
Ti1 . C15 . C16 . 73.38(8)    yes
C14 . C15 . C16 . 107.91(13)    yes
Ti1 . C15 . C20 . 120.59(10)    yes
C14 . C15 . C20 . 124.72(14)    yes
C16 . C15 . C20 . 127.30(14)    yes
Ti1 . C16 . C15 . 71.55(8)    yes
Ti1 . C16 . C17 . 73.66(8)    yes
C15 . C16 . C17 . 107.86(12)    yes
Ti1 . C16 . C21 . 123.62(10)    yes
C15 . C16 . C21 . 125.11(13)    yes
C17 . C16 . C21 . 126.91(13)    yes
Ti1 . C17 . C16 . 71.84(8)    yes
Ti1 . C17 . C18 . 73.70(8)    yes
C16 . C17 . C18 . 107.87(12)    yes
Ti1 . C17 . C22 . 122.27(9)    yes
C16 . C17 . C22 . 127.71(13)    yes
C18 . C17 . C22 . 124.37(13)    yes
Ti1 . C18 . C17 . 72.00(8)    yes
Ti1 . C18 . C14 . 71.89(8)    yes
C17 . C18 . C14 . 108.14(13)    yes
Ti1 . C18 . C23 . 128.46(10)    yes
C17 . C18 . C23 . 126.14(14)    yes
C14 . C18 . C23 . 125.18(14)    yes
C14 . C19 . H191 . 110.1    no
C14 . C19 . H192 . 109.6    no
H191 . C19 . H192 . 108.4    no
C14 . C19 . H193 . 109.8    no
H191 . C19 . H193 . 107.4    no
H192 . C19 . H193 . 111.4    no
C15 . C20 . H203 . 109.6    no
C15 . C20 . H202 . 109.2    no
H203 . C20 . H202 . 110.4    no
C15 . C20 . H201 . 109.6    no
H203 . C20 . H201 . 108.4    no
H202 . C20 . H201 . 109.7    no
C16 . C21 . H213 . 109.9    no
C16 . C21 . H212 . 109.8    no
H213 . C21 . H212 . 108.1    no
C16 . C21 . H211 . 111.6    no
H213 . C21 . H211 . 107.9    no
H212 . C21 . H211 . 109.4    no
C17 . C22 . H221 . 110.0    no
C17 . C22 . H222 . 111.4    no
H221 . C22 . H222 . 108.3    no
C17 . C22 . H223 . 110.5    no
H221 . C22 . H223 . 109.5    no
H222 . C22 . H223 . 107.1    no
C18 . C23 . H233 . 108.9    no
C18 . C23 . H232 . 106.4    no
H233 . C23 . H232 . 111.1    no
C18 . C23 . H231 . 109.2    no
H233 . C23 . H231 . 109.7    no
H232 . C23 . H231 . 111.6    no
B1 . C24 . C25 . 126.27(12)    yes
B1 . C24 . C29 . 120.75(12)    yes
C25 . C24 . C29 . 112.95(12)    yes
F1 . C25 . C24 . 120.57(12)    yes
F1 . C25 . C26 . 114.01(12)    yes
C24 . C25 . C26 . 125.40(13)    yes
C25 . C26 . F2 . 120.65(14)    yes
C25 . C26 . C27 . 118.87(14)    yes
F2 . C26 . C27 . 120.48(13)    yes
F3 . C27 . C26 . 120.71(15)    yes
F3 . C27 . C28 . 120.31(14)    yes
C26 . C27 . C28 . 118.98(13)    yes
C27 . C28 . F4 . 119.50(13)    yes
C27 . C28 . C29 . 119.49(14)    yes
F4 . C28 . C29 . 121.01(14)    yes
C24 . C29 . F5 . 119.48(12)    yes
C24 . C29 . C28 . 124.32(14)    yes
F5 . C29 . C28 . 116.19(13)    yes
B1 . C30 . C31 . 119.97(12)    yes
B1 . C30 . C35 . 126.03(12)    yes
C31 . C30 . C35 . 113.74(12)    yes
F6 . C31 . C30 . 119.62(12)    yes
F6 . C31 . C32 . 115.79(13)    yes
C30 . C31 . C32 . 124.59(13)    yes
C31 . C32 . F7 . 121.01(14)    yes
C31 . C32 . C33 . 118.86(14)    yes
F7 . C32 . C33 . 120.13(13)    yes
F8 . C33 . C32 . 120.26(14)    yes
F8 . C33 . C34 . 120.37(15)    yes
C32 . C33 . C34 . 119.36(13)    yes
F9 . C34 . C33 . 119.95(14)    yes
F9 . C34 . C35 . 120.45(14)    yes
C33 . C34 . C35 . 119.59(14)    yes
F10 . C35 . C34 . 115.27(13)    yes
F10 . C35 . C30 . 120.90(12)    yes
C34 . C35 . C30 . 123.83(14)    yes
B1 . C36 . C37 . 121.16(12)    yes
B1 . C36 . C41 . 125.48(12)    yes
C37 . C36 . C41 . 113.26(12)    yes
F11 . C37 . C36 . 119.44(12)    yes
F11 . C37 . C38 . 115.98(12)    yes
C36 . C37 . C38 . 124.57(14)    yes
F12 . C38 . C37 . 120.89(14)    yes
F12 . C38 . C39 . 119.85(13)    yes
C37 . C38 . C39 . 119.27(13)    yes
F13 . C39 . C38 . 121.22(14)    yes
F13 . C39 . C40 . 119.53(14)    yes
C38 . C39 . C40 . 119.25(13)    yes
F14 . C40 . C39 . 119.14(13)    yes
F14 . C40 . C41 . 121.30(14)    yes
C39 . C40 . C41 . 119.55(14)    yes
C36 . C41 . C40 . 124.08(13)    yes
C36 . C41 . F15 . 121.13(12)    yes
C40 . C41 . F15 . 114.79(13)    yes
C43 . C42 . C47 . 120.7(2)    yes
C43 . C42 . H421 . 119.3    no
C47 . C42 . H421 . 120.0    no
C42 . C43 . C44 . 119.79(19)    yes
C42 . C43 . H431 . 119.3    no
C44 . C43 . H431 . 120.9    no
C43 . C44 . C45 . 120.1(2)    yes
C43 . C44 . H441 . 120.5    no
C45 . C44 . H441 . 119.4    no
C44 . C45 . C46 . 119.1(2)    yes
C44 . C45 . H451 . 119.9    no
C46 . C45 . H451 . 121.0    no
C45 . C46 . C47 . 120.13(19)    yes
C45 . C46 . H461 . 119.8    no
C47 . C46 . H461 . 120.0    no
C46 . C47 . C42 . 120.1(2)    yes
C46 . C47 . H471 . 120.4    no
C42 . C47 . H471 . 119.5    no

#===end
